# Supplementary material for: N-Glycomic and Transcriptomic Changes Associated with CDX1 mRNA Expression in Colorectal Cancer Cell Lines
Source: Cells. 2019 Mar 22;8(3):273. doi: 10.3390/cells8030273 (PMC6468459; doi:10.3390/cells8030273)
Supplement: Supplementary file 1 [file cells-08-00273-s001.xlsx]

## Sheet: S1_CellLines
Supplemental Table S1: Overview of cell lines. Information on investigated cell lineson CDX1 and CDX2 mRNA expression as well as on characteristics of the orinin such as tumor site, grade, differentiation, gender, and age. Cell lines were further tested for ability of lumen formation, replication error status (RER), APC, P53, KRAS, BRAF, and PIK3CA status with 1 = wild type, 2 = mutant, n.a. = no…
Cell lines	CDX1 mRNA	CDX2 mRNA	Tumor	Duke's/grade	Differentiation	Gender	Age	Lumen Formation?	RER	APC	P53	Bcat	KRAS	BRAF	PIK3CA
HCA46	3308.59	1322.64	sigmoid colon adenocarcinoma	C	poorly	female	53	Lumen	- ve	2	2	2	1	1	2
HCC56	4115.35	394.087	colon adenocarcinoma	n.a.	moderately	n.a.	n.a.	Dense	n.a.	n.a.	n.a.	n.a.	n.a.	n.a.	n.a.
GP2D	3058.48	383.308	colon adenocarcinoma	B	poorly	female	71	Intermediate	+ ve	2	1	2	2	2	2
PCJW	2598.75	352.285	colon adenocarcinoma	C	poorly	female	30	Intermediate	- ve	2	2	1	1	1	1
LS174T	1147.36	246.775	colon adenocarcinoma	B/ grade I	well	female	58	Intermediate	+ ve	1	1	2	2	1	2
LIM1863	2862.38	205.648	colon adenocarcinoma	C/ grade III	poorly	female	74	Lumen	- ve	2	2	1	1	1	1
SW403	2964.14	190.343	colon adenocarcinoma	C/grade III	n.a.	female	51	Intermediate	- ve	2	2	1	2	2	1
RCM1	1152.22	49.3473	colon adenocarcinoma	n.a.	n.a.	female	73	Intermediate	- ve	1	2		2	1	1
ISRECO1	32.0984	19.1557	colon adenocarcinoma	n.a.	n.a.	n.a.	n.a.	n.a.	n.a.	n.a.	n.a.	n.a.	n.a.	n.a.	n.a.
VACO429	28.6877	15.6627	colon adenocarcinoma	n.a.	n.a.	n.a.	n.a.	Dense	- ve	2	2	1	1	1	2
HCT116	59.9393	12.6429	colon adenocarcinoma	grade IV	poorly	male	adult	Dense	+ ve	1	1	2	2	1	2
CC20	59.5063	8.22845	sigmoid colon adenocarcinoma	B	well	n.a.	n.a.	Network/stellate	- ve	1	2	1	1	1	1
CAR1	49.3487	7.85521	colon adenocarcinoma	n.a.	n.a.	n.a.	n.a.	Dense	- ve	1	2	n.a.	1	1	1
COLO678	16.2146	5.41702	colon adenocarcinoma, metastatic lymph node	n.a.	n.a.	male	69	Dense	- ve	2	1	1	2	1	1
HDC8	29.3057	5.0403	colon adenocarcinoma	C / grade III	n.a.	male	81	Intermediate	- ve	2	2	1	2	1	1
OXCO1	49.6926	4.11043	colon adenocarcinoma	n.a.	n.a.	n.a.	n.a.	n.a.	- ve	2	2	1	1	2	1
AVG high	2650.91	442.154
AVG low	40.5992	14.1622
Foldchange high/low	65.2947	31.2207

## Sheet: S2_Peaklist-MSMS
Supplemental Table S2: Peaklist and fragmentation information. In total, 221 N-glycans were detected which are listed with m/z value and compositions. Compositions were confirmed by MS/MS experiments and fragment ions are given according to the nomenclature of Domon & Costello (Domon, B.; Costello, C. E. Glycoconjugate Journal 1988, 5, 397-409.) Compositions marked with '±1 monosaccharide' are co…
m/z [M+Na]+	Composition 1	Composition 2	Fragment ions	Structural information	Sample
1257.42	H5N2		± one monosaccharide		all
1419.48	H6N2		347: Y-Hex2-B, Hex2-B, Z-Hex2-C; 429.05: Z-HexNAc2; 447.02: Y-HexNAc2; 509.02: Y-Hex3-B, Z-Hex3-C, Hex3-B; 527.04: Y-Hex3-C, Hex3-C; 591.06: YZ-Hex1HexNAc2; 653.05: Z-Hex4-B; 671.11: Y-Hex4-B, Z-Hex4-C; 712.09: Y-Hex3HexNAc1-B, Z-Hex3HexNAc1-C; 730.02: Y-Hex3HexNAc1-C; 753.13: YZ-Hex2HexNAc2, ZY-Hex2HexNAc2; 833.14: Y-Hex5-B, Y-Hex5-B, Z-Hex5-C, Z-Hex5-C; 874.19: Y-Hex4HexNAc1-B, Z-Hex4HexNAc1-C;…	high-mannose	LS174T, GP2D
1444.51	H4N3F1		± one monosaccharide		HCA46
1460.5	H5N3
1485.53	H3N4F1		225.94: Y-HexNAc1-B, Z-HexNAc1-C, HexNAc1-B, YZ-HexNAc1, ZY-HexNAc1; 388.03: Hex1HexNAc1-B; 406.03: Hex1HexNAc1-C; 550.01: Y-Hex2HexNAc1-B, Z-Hex2HexNAc1-C; 593.06: Y-HexNAc2dHex1; 712.06: Y-Hex3HexNAc1-B, Z-Hex3HexNAc1-C; 753.07: Y-Hex2HexNAc2-B, Z-Hex2HexNAc2-C; 915.19: Y-Hex3HexNAc2-B, Hex3HexNAc2-B, Z-Hex3HexNAc2-C; 933.19: Y-Hex3HexNAc2-C, Hex3HexNAc2-C; 1118.31: Hex3HexNAc3-B, YZ-Hex3HexNAc…	core-fucose	HCA46
1542.56	H3N5
1581.53	H7N2		± one monosaccharide		all
1590.57	H4N3F2
1606.56	H5N3F1
1617.58	H4N3E1
1622.55	H6N3
1631.59	H3N4F2		± one monosaccharide		HDC8
1647.59	H4N4F1		225.91: Y-HexNAc1-B, Z-HexNAc1-C, HexNAc1-B, Y-HexNAc1-B, Z-HexNAc1-C, YZ-HexNAc1, ZY-HexNAc1; 387.95: Hex1HexNAc1-B, Hex1HexNAc1-B, Y-Hex1HexNAc1-B, Z-Hex1HexNAc1-C; 446.96: YY-HexNAc2; 549.96: Y-Hex2HexNAc1-B, Z-Hex2HexNAc1-C, Hex2HexNAc1-B; 568.06: Y-Hex2HexNAc1-C, Hex2HexNAc1-C; 592.98: Y-HexNAc2dHex1; 693.97: Z-Hex3HexNAc1-B, Z-Hex3HexNAc1-B; 712.03: Y-Hex3HexNAc1-B, Y-Hex3HexNAc1-B, Z-Hex3H…	core-fucose	PCJW
1663.58	H5N4		± one monosaccharide		PCJW
1688.61	H3N5F1		± one monosaccharide		HDC8
1704.61	H4N5
1743.58	H8N2
1752.62	H5N3F2		± one monosaccharide		HDC8
1763.63	H4N3E1F1
1768.61	H6N3F1
1779.63	H5N3E1
1793.64	H4N4F2		± one monosaccharide		LIM1863, HCA46, PCJW, P16
1809.64	H5N4F1		± one monosaccharide		OXCO1, HDC8, LS174T, PCJW, LIM1863, HCA46, GP2D
1820.66	H4N4E1
1825.63	H6N4
1834.67	H3N5F2
1850.67	H4N5F1		± one monosaccharide		LIM1863, HCA46
1863.65	H4N3L1F2
1866.66	H5N5
1879.64	H5N3L1F1
1891.69	H3N6F1
1905.63	H9N2
1914.67	H6N3F2
1930.67	H7N3F1
1936.67	H5N4L1
1941.68	H6N3E1
1955.7	H5N4F2		370.04: Z-Hex1HexNAc1-B, Z-Hex1HexNAc1-B; 387.93: Y-Hex1HexNAc1-B, Hex1HexNAc1-B, Y-Hex1HexNAc1-B, Z-Hex1HexNAc1-C, Z-Hex1HexNAc1-C; 533.94: Z-Hex1HexNAc1dHex1-C, Hex1HexNAc1dHex1-B, Y-Hex1HexNAc1dHex1-B; 549.97: Y-Hex2HexNAc1-B, Hex2HexNAc1-B, Z-Hex2HexNAc1-C; 696.05: Hex2HexNAc1dHex1-B; 712.02: Y-Hex3HexNAc1-B, Z-Hex3HexNAc1-C; 858.16: Y-Hex3HexNAc1dHex1-B, Z-Hex3HexNAc1dHex1-C; 874.07: Y-Hex4H…	core-fucose + antenna-fucose	LS174T
1966.71	H4N4E1F1		± one monosaccharide		OXCO1, HDC8
1971.69	H6N4F1
1982.71	H5N4E1		387.73: Hex1HexNAc1-B, Y-Hex1HexNAc1-B, Y-Hex1HexNAc1-B, Z-Hex1HexNAc1-C, Z-Hex1HexNAc1-C; 503.71: Hex1(α2,6)NeuAc1-B; 549.68: Hex2HexNAc1-B, Y-Hex2HexNAc1-B, Z-Hex2HexNAc1-C; 706.78: Hex1HexNAc1(α2,6)NeuAc1-B; 712.69: Y-Hex3HexNAc1-B, Z-Hex3HexNAc1-C; 770.8: YY-Hex2HexNAc2; 868.82: Hex2HexNAc1(α2,6)NeuAc1-B; 873.79: Y-Hex4HexNAc1-B, Z-Hex4HexNAc1-C; 1076.9: Y-Hex4HexNAc2-B, Y-Hex4HexNAc2-B, Z-He…		VACO429
1996.72	H4N5F2
2012.72	H5N5F1
2023.73	H4N5E1
2028.71	H6N5		± one monosaccharide		HCT116
2037.75	H3N6F2
2041.7	H6N3L1F1
2053.75	H4N6F1
2067.69	H10N2
2082.72	H5N4L1F1
2087.74	H6N3E1F1
2101.76	H5N4F3		± one monosaccharide		HDC8, SW403, LS174T, GP2D, HCA46
2117.75	H6N4F2		± one monosaccharide		LS174T
2123.75	H4N5L1F1
2128.77	H5N4E1F1		342.1: (α2,6)NeuAc1-B; 387.83: Hex1HexNAc1-B, Y-Hex1HexNAc1-B, Y-Hex1HexNAc1-B, Z-Hex1HexNAc1-C, Z-Hex1HexNAc1-C; 549.9: Hex2HexNAc1-B, Y-Hex2HexNAc1-B, Z-Hex2HexNAc1-C; 706.94: Hex1HexNAc1(α2,6)NeuAc1-B; 711.98: Y-Hex3HexNAc1-B, Z-Hex3HexNAc1-C; 874.03: Y-Hex4HexNAc1-B, Z-Hex4HexNAc1-C; 915.05: Y-Hex3HexNAc2-B, Z-Hex3HexNAc2-C; 933.09: Y-Hex3HexNAc2-C; 1077.19: Y-Hex4HexNAc2-B, Y-Hex4HexNAc2-B, …	core-fucose	HDC8, ISRECO1
2142.78	H4N5F3
2158.78	H5N5F2		± one monosaccharide		HDC8, PCJW
2169.79	H4N5E1F1
2174.77	H6N5F1
2183.81	H3N6F3
2185.79	H5N5E1		± one monosaccharide		HCT116
2199.8	H4N6F2
2209.75	H5N4L2
2215.8	H5N6F1
2228.78	H5N4L1F2		± one monosaccharide		HDC8, LS174T
2247.81	H5N4F4		387.83: Y-Hex1HexNAc1-B, Z-Hex1HexNAc1-C; 534.06: Z-Hex1HexNAc1dHex1-C, Z-Hex1HexNAc1dHex1-C, Hex1HexNAc1dHex1-B, Y-Hex1HexNAc1dHex1-B, Y-Hex1HexNAc1dHex1-B, Y-Hex1HexNAc1dHex1-B, Z-Hex1HexNAc1dHex1-C; 549.92: Y-Hex2HexNAc1-B, Z-Hex2HexNAc1-C; 679.97: Hex1HexNAc1dHex2-B; 1223.22: Y-Hex4HexNAc2dHex1-B, Z-Hex4HexNAc2dHex1-C; 1444.43: YY-Hex4HexNAc3dHex1, YY-Hex4HexNAc3dHex1; 1590.49: YY-Hex4HexNAc3…	core-fucose + antenna-fucose	GP2D
2255.79	H5N4L1E1		± one monosaccharide		PCJW, HCT116
2274.82	H5N4E1F2		388: Y-Hex1HexNAc1-B,Y-Hex1HexNAc1-B,Y-Hex1HexNAc1-B,Z-Hex1HexNAc1-C,Z-Hex1HexNAc1-C,Z-Hex1HexNAc1-C; 550.12: Y-Hex2HexNAc1-B,Y-Hex2HexNAc1-B,Z-Hex2HexNAc1-C,Z-Hex2HexNAc1-C; 707.05: Hex1HexNAc1(α2,6)NeuAc1-B; 1282.26: YY-Hex3HexNAc3dHex1,YY-Hex3HexNAc3dHex1,YY-Hex3HexNAc3dHex1,YY-Hex3HexNAc3dHex1; 1590.4: Y-Hex4HexNAc3dHex2; 1763.57: Y-Hex4HexNAc3(α2,6)NeuAc1dHex1,Y-Hex4HexNAc3(α2,6)NeuAc1dHex1-…	core-fucose + antenna-fucose	HDC8, ISRECO1
2290.82	H6N4E1F1		387.73: Y-Hex1HexNAc1-B, Y-Hex1HexNAc1-B, Y-Hex1HexNAc1-B, Z-Hex1HexNAc1-C, Z-Hex1HexNAc1-C, Z-Hex1HexNAc1-C; 549.75: Hex2HexNAc1-B, Y-Hex2HexNAc1-B, Y-Hex2HexNAc1-B, Z-Hex2HexNAc1-C, Z-Hex2HexNAc1-C; 706.78: Hex1HexNAc1(α2,6)NeuAc1-B; 711.76: Hex3HexNAc1-B; 873.84: Y-Hex4HexNAc1-B, Z-Hex4HexNAc1-C; 1035.97: Y-Hex5HexNAc1-B, Z-Hex5HexNAc1-C; 1239.01: Y-Hex5HexNAc2-B, Y-Hex5HexNAc2-B, Z-Hex5HexNAc…	hybrid or blood group B	HDC8, SW403
2301.83	H5N4E2	H6N5L1	± one monosaccharide		PCJW, CC20
2304.83	H5N5F3		± one monosaccharide		COLO678
2320.83	H6N5F2		± one monosaccharide		COLO678, ISRECO1
2331.85	H5N5E1F1		387.86: Hex1HexNAc1-B, Y-Hex1HexNAc1-B, Y-Hex1HexNAc1-B, Y-Hex1HexNAc1-B, Z-Hex1HexNAc1-C, Z-Hex1HexNAc1-C, Z-Hex1HexNAc1-C; 504.06: Hex1(α2,6)NeuAc1-B; 550.1: Y-Hex2HexNAc1-B, Y-Hex2HexNAc1-B, Z-Hex2HexNAc1-C, Z-Hex2HexNAc1-C; 706.95: Hex1HexNAc1(α2,6)NeuAc1-B; 752.92: Hex2HexNAc2-B; 869.07: Hex2HexNAc1(α2,6)NeuAc1-B; 915.69: Y-Hex3HexNAc2-B, Z-Hex3HexNAc2-C; 932.88: Y-Hex3HexNAc2-C; 1077.08: Y-…	core-fucose	HDC8, SW403
2347.84	H6N5E1		387.86: Hex1HexNAc1-B, Y-Hex1HexNAc1-B, Y-Hex1HexNAc1-B, Z-Hex1HexNAc1-C, Z-Hex1HexNAc1-C; 549.88: Y-Hex2HexNAc1-B, Y-Hex2HexNAc1-B, Z-Hex2HexNAc1-C, Z-Hex2HexNAc1-C; 706.94: Hex1HexNAc1(α2,6)NeuAc1-B; 752.88: Y-Hex2HexNAc2-B, Z-Hex2HexNAc2-C, ZY-Hex2HexNAc2, YZ-Hex2HexNAc2; 914.89: Hex3HexNAc2-B; 1077.04: Y-Hex4HexNAc2-B, Z-Hex4HexNAc2-C; 1117.97: YZ-Hex3HexNAc3, ZY-Hex3HexNAc3, ZY-Hex3HexNAc3, …		HCT116, VACO429
2355.81	H5N4L2F1
2361.86	H5N6F2
2372.87	H4N6E1F1
2374.84	H5N4L1F3
2377.85	H6N6F1		± one monosaccharide		HCA46, SW403
2393.85	H7N6	H5N4F5	± one monosaccharide		HCA46, HCT116, SW403
2401.85	H5N4L1E1F1
2420.88	H5N4E1F3		387.81: Y-Hex1HexNAc1-B,Y-Hex1HexNAc1-B,Z-Hex1HexNAc1-C,Z-Hex1HexNAc1-C; 405.83: Y-Hex1HexNAc1-C,Y-Hex1HexNAc1-C; 706.81: Hex1HexNAc1(α2,6)NeuAc1-B; 1396.16: Y-Hex4HexNAc2(α2,6)NeuAc1-B,Z-Hex4HexNAc2(α2,6)NeuAc1-C; 1590.19: Y-Hex4HexNAc3dHex2-C,YY-Hex4HexNAc3dHex2,YY-Hex4HexNAc3dHex2,YY-Hex4HexNAc3dHex2; 1763.22: Y-Hex4HexNAc3(α2,6)NeuAc1dHex1,Y-Hex4HexNAc3(α2,6)NeuAc1dHex1-C; 1966.59: YY-Hex4Hex…	core-fucose + antenna-fucose	ISRECO1
2447.89	H5N4E2F1	H6N5L1F1	± one monosaccharide		OXCO1, HDC8
2450.89	H5N5F4		± one monosaccharide		SW403, HCA46
2458.87	H5N5L1E1
2466.89	H6N5F3		387.83: Y-Hex1HexNAc1-B,Z-Hex1HexNAc1-C; 533.79: Z-Hex1HexNAc1dHex1-C,Hex1HexNAc1dHex1-B,Y-Hex1HexNAc1dHex1-B; 549.85: Y-Hex2HexNAc1-B,Z-Hex2HexNAc1-C; 568.14: Y-Hex2HexNAc1-C; 590.97: YZ-Hex1HexNAc2; 696.01: Y-Hex2HexNAc1dHex1-B,Hex2HexNAc1dHex1-B,Z-Hex2HexNAc1dHex1-C; 753.12: ZY-Hex2HexNAc2,YZ-Hex2HexNAc2; 2122.27: ZZ-Hex5HexNAc5dHex2,ZZ-Hex5HexNAc5dHex2,ZZ-Hex5HexNAc5dHex2,ZZ-Hex5HexNAc5dHex2,…	core-fucose? + antenna-fucose	GP2D
2477.9	H5N5E1F2		342.1: (α2,6)NeuAc1-B; 387.85: Y-Hex1HexNAc1-B, Y-Hex1HexNAc1-B, Y-Hex1HexNAc1-B, Y-Hex1HexNAc1-B, Z-Hex1HexNAc1-C, Z-Hex1HexNAc1-C, Z-Hex1HexNAc1-C, Z-Hex1HexNAc1-C; 504.08: Hex1(α2,6)NeuAc1-B; 533.83: Hex1HexNAc1dHex1-B; 549.83: Y-Hex2HexNAc1-B, Z-Hex2HexNAc1-C; 707: Hex1HexNAc1(α2,6)NeuAc1-B; 752.88: Y-Hex2HexNAc2-B, Z-Hex2HexNAc2-C; 868.92: Hex2HexNAc1(α2,6)NeuAc1-B; 899.04: Hex2HexNAc2dHex1-…	core-fucose + antenna-fucose	SW403
2493.9	H6N5E1F1		370.27: Z-Hex1HexNAc1-B, Z-Hex1HexNAc1-B; 387.84: Hex1HexNAc1-B, Y-Hex1HexNAc1-B, Y-Hex1HexNAc1-B, Z-Hex1HexNAc1-C, Z-Hex1HexNAc1-C; 550.02: Y-Hex2HexNAc1-B, Y-Hex2HexNAc1-B, Z-Hex2HexNAc1-C, Z-Hex2HexNAc1-C; 706.93: Hex1HexNAc1(α2,6)NeuAc1-B; 752.89: Y-Hex2HexNAc2-B, Z-Hex2HexNAc2-C; 915.1: Hex3HexNAc2-B; 1077.13: Y-Hex4HexNAc2-B, Z-Hex4HexNAc2-C; 1239.08: Y-Hex5HexNAc2-B, Z-Hex5HexNAc2-C; 1280.…	core-fucose	HDC8
2504.91	H5N5E2	H6N6L1
2507.91	H5N6F3
2523.91	H6N6F2
2534.92	H5N6E1F1		± one monosaccharide		HDC8
2539.9	H7N6F1		387.97: Y-Hex1HexNAc1-B, Hex1HexNAc1-B, Z-Hex1HexNAc1-C; 533.86: Hex1HexNAc1dHex1-B; 549.8: Y-Hex2HexNAc1-B, Z-Hex2HexNAc1-C; 590.9: YZ-Hex1HexNAc2; 752.88: Y-Hex2HexNAc2-B, Z-Hex2HexNAc2-C; 899.17: Z-Hex2HexNAc2dHex1-C, Y-Hex2HexNAc2dHex1-B, Y-Hex2HexNAc2dHex1-B, Z-Hex2HexNAc2dHex1-C; 933.06: Y-Hex3HexNAc2-C, Hex3HexNAc2-C; 1077.2: Y-Hex4HexNAc2-B, Z-Hex4HexNAc2-C; 1118.36: ZY-Hex3HexNAc3, YZ-He…	core-fucose/ antenna fucose (isomers)	HDC8, GP2D
2550.92	H6N6E1		± one monosaccharide		HCT116
2564.94	H5N7F2
2574.88	H6N5L2
2577.92	H5N5L1F3
2580.93	H6N7F1
2593.91	H6N5L1F2
2596.93	H7N7
2612.95	H6N5F4		387.91: Y-Hex1HexNAc1-B, Z-Hex1HexNAc1-C; 533.95: Z-Hex1HexNAc1dHex1-C, Hex1HexNAc1dHex1-B, Y-Hex1HexNAc1dHex1-B; 549.93: Y-Hex2HexNAc1-B, Z-Hex2HexNAc1-C; 899.08: YZ-Hex2HexNAc2dHex1, ZY-Hex2HexNAc2dHex1; 1590.31: Y-Hex4HexNAc3dHex2-C, YY-Hex4HexNAc3dHex2, YY-Hex4HexNAc3dHex2; 1896.45: Y-Hex6HexNAc3dHex2-B, Y-Hex6HexNAc3dHex2-B, Z-Hex6HexNAc3dHex2-C, Z-Hex6HexNAc3dHex2-C; 1955.65: YY-Hex5HexNAc4…	core-fucose + antenna-fucose	LS174T
2620.93	H6N5L1E1		± one monosaccharide		VACO429
2623.96	H5N5E1F3		387.74: Y-Hex1HexNAc1-B, Y-Hex1HexNAc1-B, Z-Hex1HexNAc1-C, Z-Hex1HexNAc1-C; 549.73: Y-Hex2HexNAc1-B, Z-Hex2HexNAc1-C; 1396.15: Y-Hex4HexNAc2(α2,6)NeuAc1-B, Z-Hex4HexNAc2(α2,6)NeuAc1-C; 1485.26: YY-Hex3HexNAc4dHex1, YY-Hex3HexNAc4dHex1; 1647.34: YY-Hex4HexNAc4dHex1; 1793.43: Y-Hex4HexNAc4dHex2-C, YY-Hex4HexNAc4dHex2, YY-Hex4HexNAc4dHex2, YY-Hex4HexNAc4dHex2; 1939.61: Y-Hex4HexNAc4dHex3, YY-Hex4Hex…	core-fucose + antenna-fucose	SW403
2639.96	H6N5E1F2		387.91: Y-Hex1HexNAc1-B,Hex1HexNAc1-B,Y-Hex1HexNAc1-B,Y-Hex1HexNAc1-B,Z-Hex1HexNAc1-C,Z-Hex1HexNAc1-C,Z-Hex1HexNAc1-C; 549.78: Y-Hex2HexNAc1-B,Y-Hex2HexNAc1-B,Z-Hex2HexNAc1-C,Z-Hex2HexNAc1-C; 706.98: Hex1HexNAc1(α2,6)NeuAc1-B; 933.38: Y-Hex3HexNAc2-C; 1647.6: YY-Hex4HexNAc4dHex1,YY-Hex4HexNAc4dHex1,YY-Hex4HexNAc4dHex1; 1809.52: Y-Hex5HexNAc4dHex1-C,YY-Hex5HexNAc4dHex1,YY-Hex5HexNAc4dHex1,YY-Hex5H…	core-fucose + antenna-fucose	ISRECO1
2650.94	H5N5E2F1		341.87: (α2,6)NeuAc1-B; 387.82: Y-Hex1HexNAc1-B, Y-Hex1HexNAc1-B, Z-Hex1HexNAc1-C, Z-Hex1HexNAc1-C; 503.86: Hex1(α2,6)NeuAc1-B; 522: Hex1(α2,6)NeuAc1-C; 550.05: Y-Hex2HexNAc1-B, Z-Hex2HexNAc1-C; 707: Hex1HexNAc1(α2,6)NeuAc1-B; 869.07: Hex2HexNAc1(α2,6)NeuAc1-B; 1234.29: Y-Hex3HexNAc2(α2,6)NeuAc1-B, Z-Hex3HexNAc2(α2,6)NeuAc1-C; 1282.23: YY-Hex3HexNAc3dHex1; 1396.38: Y-Hex4HexNAc2(α2,6)NeuAc1-B, Z-…	core-fucose	SW403
2653.97	H5N6F4
2660.93	H9N5F1
2666.97	H6N5E2	H7N6L1	± one monosaccharide		HCT116
2669.97	H6N6F3		± one monosaccharide		COLO678, HDC8
2685.96	H7N6F2		± one monosaccharide		ISRECO1
2696.98	H6N6E1F1
2704.95	H5N5L2F2
2710.99	H5N7F3
2712.97	H7N6E1		387.88: Hex1HexNAc1-B, Y-Hex1HexNAc1-B, Z-Hex1HexNAc1-C; 549.83: Y-Hex2HexNAc1-B, Z-Hex2HexNAc1-C; 706.96: Hex1HexNAc1(α2,6)NeuAc1-B; 914.95: Hex3HexNAc2-B, Y-Hex3HexNAc2-B, Z-Hex3HexNAc2-C; 1077.1: Y-Hex4HexNAc2-B, Z-Hex4HexNAc2-C; 1234.32: Hex3HexNAc2(α2,6)NeuAc1-B; 1280.12: Y-Hex4HexNAc3-B, Z-Hex4HexNAc3-C; 1298.28: Y-Hex4HexNAc3-C; 1617.38: Y-Hex4HexNAc3(α2,6)NeuAc1-C; 1663.37: YY-Hex5HexNAc4…		HCT116, VACO429
2720.98	H6N5L2F1
2726.99	H6N7F2
2739.97	H6N5L1F3		± one monosaccharide		COLO678, HDC8
2742.98	H7N7F1		± one monosaccharide		HCA46
2750.99	H5N5L1E1F2		± one monosaccharide		PCJW
2758.98	H6N5F5	H8N7	369.96: Z-Hex1HexNAc1-B; 387.84: Y-Hex1HexNAc1-B,Z-Hex1HexNAc1-C; 533.88: Z-Hex1HexNAc1dHex1-C,Z-Hex1HexNAc1dHex1-C,Hex1HexNAc1dHex1-B,Y-Hex1HexNAc1dHex1-B,Y-Hex1HexNAc1dHex1-B,Y-Hex1HexNAc1dHex1-B,Z-Hex1HexNAc1dHex1-C; 549.94: Y-Hex2HexNAc1-B,Z-Hex2HexNAc1-C; 567.98: Y-Hex2HexNAc1-C; 858.03: Y-Hex3HexNAc1dHex1-B,Z-Hex3HexNAc1dHex1-C; 898.92: ZY-Hex2HexNAc2dHex1,YZ-Hex2HexNAc2dHex1; 1061.11: Y-He…	core-fucose + antenna-fucose (Lewis B/Y)	HCT116, GP2D
2766.98	H6N5L1E1F1		± one monosaccharide		ISRECO1
2786.01	H6N5E1F3		387.85: Y-Hex1HexNAc1-B,Y-Hex1HexNAc1-B,Y-Hex1HexNAc1-B,Z-Hex1HexNAc1-C,Z-Hex1HexNAc1-C,Z-Hex1HexNAc1-C; 406: Y-Hex1HexNAc1-C,Y-Hex1HexNAc1-C,Y-Hex1HexNAc1-C; 533.86: Hex1HexNAc1dHex1-B; 549.97: Y-Hex2HexNAc1-B,Z-Hex2HexNAc1-C; 706.94: Hex1HexNAc1(α2,6)NeuAc1-B; 1763.29: YY-Hex4HexNAc3(α2,6)NeuAc1dHex1; 2101.57: Y-Hex5HexNAc4dHex3; 2418.39: Hex6HexNAc4(α2,6)NeuAc1dHex2-B; 2448.48: Z-Hex6HexNAc5dH…	core-fucose + antenna-fucose	ISRECO1
2797.03	H5N5E2F2	H6N6L1F2	± one monosaccharide		PCJW
2812.99	H6N5E2F1	H7N6L1F1	± one monosaccharide		ISRECO1, CAR1, HCA46
2816.02	H6N6F4
2832.02	H7N6F3
2843.04	H6N6E1F2		370: Z-Hex1HexNAc1-B, Z-Hex1HexNAc1-B, Z-Hex1HexNAc1-B; 387.84: Y-Hex1HexNAc1-B, Hex1HexNAc1-B, Y-Hex1HexNAc1-B, Y-Hex1HexNAc1-B, Z-Hex1HexNAc1-C, Z-Hex1HexNAc1-C, Z-Hex1HexNAc1-C; 503.82: Hex1(α2,6)NeuAc1-B; 533.93: Hex1HexNAc1dHex1-B; 549.79: Y-Hex2HexNAc1-B, Z-Hex2HexNAc1-C; 706.91: Hex1HexNAc1(α2,6)NeuAc1-B; 752.86: Y-Hex2HexNAc2-B, Z-Hex2HexNAc2-C; 868.89: Y-Hex2HexNAc1(α2,6)NeuAc1-B, Z-Hex2…	core-fucose + antenna-fucose	SW403
2847.97	H6N5L3
2859.03	H7N6E1F1		387.8: Hex1HexNAc1-B, Y-Hex1HexNAc1-B, Z-Hex1HexNAc1-C; 549.86: Y-Hex2HexNAc1-B, Z-Hex2HexNAc1-C; 706.95: Hex1HexNAc1(α2,6)NeuAc1-B; 752.86: Y-Hex2HexNAc2-B, Z-Hex2HexNAc2-C; 914.88: Hex3HexNAc2-B, Y-Hex3HexNAc2-B, Z-Hex3HexNAc2-C; 933.16: Hex3HexNAc2-C, Y-Hex3HexNAc2-C; 1077.01: Y-Hex4HexNAc2-B, Z-Hex4HexNAc2-C; 1604.37: Y-Hex6HexNAc3-B, Z-Hex6HexNAc3-C; 1807.46: Y-Hex6HexNAc4-B, Y-Hex6HexNAc4-B…	core-fucose	HDC8
2870.05	H6N6E2	H7N7L1
2873.05	H6N7F3
2886.03	H6N5L1F4
2889.04	H7N7F2
2894.01	H6N5L2E1
2905.04	H6N5F6	H8N7F1	387.79: Y-Hex1HexNAc1-B,Z-Hex1HexNAc1-C; 405.8: Y-Hex1HexNAc1-C; 533.89: Z-Hex1HexNAc1dHex1-C,Z-Hex1HexNAc1dHex1-C,Hex1HexNAc1dHex1-B,Y-Hex1HexNAc1dHex1-B,Y-Hex1HexNAc1dHex1-B,Y-Hex1HexNAc1dHex1-B,Z-Hex1HexNAc1dHex1-C; 549.68: Y-Hex2HexNAc1-B,Z-Hex2HexNAc1-C; 680.01: Hex1HexNAc1dHex2-B; 695.84: Hex2HexNAc1dHex1-B; 857.86: Y-Hex3HexNAc1dHex1-B,Z-Hex3HexNAc1dHex1-C; 898.95: ZY-Hex2HexNAc2dHex1,YZ-H…	core-fucose + antenna-fucose (Lewis B/Y)	GP2D
2932.07	H6N5E1F4		± one monosaccharide		HCA46, HCC56
2940.05	H6N5L1E2	H7N6L2
2946.06	H7N8F1
2959.05	H7N6L1F2	H6N5E2F2	± one monosaccharide		HDC8
2962.06	H6N6F5	H8N8	387.73: Y-Hex1HexNAc1-B,Z-Hex1HexNAc1-C; 549.77: Y-Hex2HexNAc1-B,Z-Hex2HexNAc1-C; 1793.52: YY-Hex4HexNAc4dHex2,YY-Hex4HexNAc4dHex2; 2158.81: YY-Hex5HexNAc5dHex2,YY-Hex5HexNAc5dHex2,YY-Hex5HexNAc5dHex2; 2304.66: Y-Hex5HexNAc5dHex3-C,YY-Hex5HexNAc5dHex3,YY-Hex5HexNAc5dHex3,YY-Hex5HexNAc5dHex3,Y-Hex5HexNAc5dHex3,YY-Hex5HexNAc5dHex3,YY-Hex5HexNAc5dHex3,YY-Hex5HexNAc5dHex3,YY-Hex5HexNAc5dHex3,YY-Hex5H…		GP2D
2978.08	H7N6F4		387.8: Y-Hex1HexNAc1-B, Hex1HexNAc1-B, Z-Hex1HexNAc1-C; 549.77: Y-Hex2HexNAc1-B, Z-Hex2HexNAc1-C; 899.06: Z-Hex2HexNAc2dHex1-C, Y-Hex2HexNAc2dHex1-B, Y-Hex2HexNAc2dHex1-B, Z-Hex2HexNAc2dHex1-C; 915.08: Y-Hex3HexNAc2-B, Z-Hex3HexNAc2-C; 2464.76: Y-Hex7HexNAc5dHex2-B, Y-Hex7HexNAc5dHex2-B, Z-Hex7HexNAc5dHex2-C, Z-Hex7HexNAc5dHex2-C; 2466.81: YY-Hex6HexNAc5dHex3, Y-Hex6HexNAc5dHex3, YY-Hex6HexNAc5dH…	core-fucose? + antenna-fucose	LS174T
2986.06	H7N6L1E1		± one monosaccharide		HCT116
2989.09	H6N6E1F3		387.94: Y-Hex1HexNAc1-B, Y-Hex1HexNAc1-B, Y-Hex1HexNAc1-B, Z-Hex1HexNAc1-C, Z-Hex1HexNAc1-C, Z-Hex1HexNAc1-C; 503.71: Hex1(α2,6)NeuAc1-B; 533.82: Hex1HexNAc1dHex1-B; 696.23: Y-Hex2HexNAc1dHex1-B, Z-Hex2HexNAc1dHex1-C; 707.07: Hex1HexNAc1(α2,6)NeuAc1-B; 752.98: Y-Hex2HexNAc2-B, Z-Hex2HexNAc2-C; 1966.72: YY-Hex4HexNAc4(α2,6)NeuAc1dHex1; 2158.83: YY-Hex5HexNAc5dHex2, YY-Hex5HexNAc5dHex2, Y-Hex5HexNA…	core-fucose + antenna-fucose	SW403
2994.03	H6N5L3F1
3005.09	H7N6E1F2		370.09: Z-Hex1HexNAc1-B,Z-Hex1HexNAc1-B; 387.87: Y-Hex1HexNAc1-B,Hex1HexNAc1-B,Y-Hex1HexNAc1-B,Z-Hex1HexNAc1-C,Z-Hex1HexNAc1-C; 405.94: Y-Hex1HexNAc1-C,Hex1HexNAc1-C,Y-Hex1HexNAc1-C; 550: Y-Hex2HexNAc1-B,Z-Hex2HexNAc1-C; 706.86: Hex1HexNAc1(α2,6)NeuAc1-B; 752.8: Y-Hex2HexNAc2-B,Z-Hex2HexNAc2-C; 914.99: Y-Hex3HexNAc2-B,Y-Hex3HexNAc2-B,Z-Hex3HexNAc2-C,Z-Hex3HexNAc2-C; 1955.69: YY-Hex5HexNAc4dHex2,Y…	core-fucose + antenna-fucose	HDC8, ISRECO1
3019.1	H6N7F4
3032.1	H7N6E2	H8N7L1	± one monosaccharide		HCT116
3035.1	H7N7F3
3040.07	H6N5L2E1F1
3051.09	H8N7F2
3059.1	H6N5L1E1F3		± one monosaccharide		HCC56
3078.1	H8N7E1		370.11: Z-Hex1HexNAc1-B, Z-Hex1HexNAc1-B, Z-Hex1HexNAc1-B; 387.87: Y-Hex1HexNAc1-B, Z-Hex1HexNAc1-C, Y-Hex1HexNAc1-B, Z-Hex1HexNAc1-C, Hex1HexNAc1-B, Y-Hex1HexNAc1-B, Z-Hex1HexNAc1-C; 549.68: Y-Hex2HexNAc1-B, Z-Hex2HexNAc1-C, Y-Hex2HexNAc1-B, Z-Hex2HexNAc1-C; 707.02: Hex1HexNAc1(α2,6)NeuAc1-B; 752.91: Y-Hex2HexNAc2-B, Y-Hex2HexNAc2-B, Z-Hex2HexNAc2-C, Z-Hex2HexNAc2-C; 914.88: Hex3HexNAc2-B, Y-Hex…		VACO429
3086.11	H7N6L2F1	H6N5L1E2F1
3092.12	H7N8F2
3108.12	H8N8F1	H6N6F6	± one monosaccharide		GP2D
3124.11	H7N6F5	H9N8	387.87: Y-Hex1HexNAc1-B, Z-Hex1HexNAc1-C; 1410.25: ZY-Hex3HexNAc3dHex2, YZ-Hex3HexNAc3dHex2; 2263.74: Y-Hex6HexNAc4dHex3-C; 2779.58: ZZ-Hex6HexNAc6dHex4, ZZ-Hex6HexNAc6dHex4, ZZ-Hex6HexNAc6dHex4, ZZ-Hex6HexNAc6dHex4, ZZ-Hex6HexNAc6dHex4; 2795.77: ZZ-Hex7HexNAc6dHex3, ZZ-Hex7HexNAc6dHex3, ZZ-Hex7HexNAc6dHex3; 2832.17: YY-Hex7HexNAc6dHex3, YY-Hex7HexNAc6dHex3, YY-Hex7HexNAc6dHex3; 2961.96: Y-Hex6He…	core-fucose + antenna-fucose	LS174T
3132.12	H7N6L1E1F1		± one monosaccharide		ISRECO1
3151.15	H7N6E1F3		370.02: Z-Hex1HexNAc1-B,Z-Hex1HexNAc1-B; 387.92: Y-Hex1HexNAc1-B,Hex1HexNAc1-B,Y-Hex1HexNAc1-B,Z-Hex1HexNAc1-C,Z-Hex1HexNAc1-C; 504.1: Hex1(α2,6)NeuAc1-B; 549.77: Y-Hex2HexNAc1-B,Z-Hex2HexNAc1-C; 707.18: Hex1HexNAc1(α2,6)NeuAc1-B; 915.04: Y-Hex3HexNAc2-B,Z-Hex3HexNAc2-C; 1955.74: YY-Hex5HexNAc4dHex2; 2128.75: YY-Hex5HexNAc4(α2,6)NeuAc1dHex1; 2254.82: Z-Hex6HexNAc4(α2,6)NeuAc1dHex1-B; 2466.8: Y-He…	core-fucose + antenna-fucose	ISRECO1
3162.16	H6N6E2F2	H7N7L1F2	± one monosaccharide		HCC56
3165.14	H8N9
3178.16	H7N6E2F1	H8N7L1F1	± one monosaccharide		ISRECO1, GP2D
3181.16	H7N7F4
3197.15	H8N7F3
3213.14	H7N6L3
3224.16	H8N7E1F1
3232.13	H7N6L2F2
3238.18	H7N8F3
3254.17	H8N8F2
3262.18	H6N6L1E1F3
3270.17	H9N8F1
3278.21	H7N6L1E1F2
3297.2	H7N6E1F4
3305.18	H7N6L1E2	H8N7L2
3327.19	H9N9	H7N7F5
3343.21	H8N7F4
3351.23	H8N7L1E1	H7N6E3	± one monosaccharide		HCT116
3359.19	H7N6L3F1
3370.17	H8N7E1F2
3384.24	H7N8F4
3397.23	H8N7E2	H9N8L1	± one monosaccharide		HCT116
3400.23	H8N8F3
3405.2	H7N6L2E1F1
3416.23	H9N8F2
3424.27	H7N6L1E1F3
3443.24	H9N8E1
3451.24	H7N6L1E2F1	H8N7L2F1
3473.25	H9N9F1
3489.24	H10N9	H8N7F5
3497.28	H7N6E3F1	H8N7L1E1F1
3500.22	H7N7E1F4
3505.22	H7N6L3F2
3516.28	H8N7E1F3
3532.23	H7N6L3E1
3546.29	H8N8F4
3562.28	H9N8F3
3570.28	H7N6L1E1F4
3578.27	H7N6L2E2	H8N7L3
3589.29	H9N8E1F1
3619.31	H9N9F2
3624.31	H7N6L1E3	H8N7L2E1
3632.24	H7N6L4F1
3635.3	H10N9F1
3678.32	H6N5L2E3F1	H7N6L3E1F1
3692.32	H8N8F5	H10N10
3697.32	H7N6L2E1F3
3708.34	H9N8F4
3716.36	H8N7E3	H9N8E1L1
3724.33	H7N6L2E2F1
3762.36	H9N8E2	H10N9L1
3765.36	H9N9F3
3781.36	H10N9F2
3808.37	H10N9E1
3838.38	H10N10F1
3843.38	H7N6L2E1F4
3854.4	H9N8F5
3897.36	H8N7L3E1
3911.42	H9N9F4
3927.42	H10N9F3
3943.36	H8N7L2E2	H9N8L3
3984.44	H10N10F2
3989.41	H9N8L2E1
220	220	33	81

## Sheet: S3_Traits AVG
Supplemental Table S3: Relative abundance of derived traits. Derived traits were calculated according to Supplemental Table S4 and averaged per cell line. The total average of CDX1 high vs. CDX1 low expressing cells was calculated. An increase (green) or decrease (red) of a derived traits for CDX1 high expressing cell lines is expressed as fold change. P-values were calculated using a Mann-Whitne…
					Type			Mannoses	Antennarity (in complex type only)									Hex/HexNAc	Fucosylation			Sialylation			sialyl Lewis		Gal or NeuAc per antenna				NeuAc/Gal			Fucosylation per antenna								Galactosylation per antenna
CellLine	TechnRepl	MALDIspot	CDX1 mRNA	CDX2 mRNA	M	Hy	C	MM	A1	A2	A3	A4	ALN	CA2	CA3	CA4	N≥7	N≥H	CF	CFc	CFa	CS	CL	CE	CLF	CLFa	AG	AS	AL	AE	GS	GL	GE	A2F	A3F	A4F	ALNF	A2Fa	A3Fa	A4Fa	ALNFa	A2G	A3G	A4G	A2F0G	A3F0G	A4F0G	A2FG	A3FG
GP2D	Trait_AVG	L5	High	High	32.0838	5.1471	61.7026	7.78177	0.2545	8.81515	16.4623	16.6974	12.3395	10.3951	13.9772	12.2022	30.7114	24.0841	78.8509	27.4874	51.3635	17.7601	9.7971	10.4869	6.24095	3.8062	71.4403	20.1862	10.7004	10.0381	27.9241	15.5754	13.7764	83.2165	84.0965	85.5192	64.9741	50.6936	57.8375	60.7042	36.6893	78.6771	72.3693	66.8735	90.2766	74.9181	96.5232	76.2122	71.9529
HCA46	Trait_AVG	L11	High	High	29.7742	2.93577	66.1203	7.85296	0.35885	9.46563	19.7081	19.0649	2.70667	10.3652	13.1641	11.6439	27.2838	31.2273	85.8572	34.3516	51.5055	19.955	9.03709	12.9209	6.0188	4.19472	69.0036	17.4466	7.16392	10.6127	24.8639	11.1619	16.1076	83.0645	87.1842	90.8947	65.1645	38.6155	52.5282	55.0583	42.5895	76.7655	68.4532	66.5678	86.6073	75.2947	94.0539	74.693	67.4302
HCC56	Trait_AVG	P21	High	High	47.4094	4.18165	47.0104	7.78359	0.6986	8.52035	16.6149	13.3625	1.77	14.5433	16.1358	13.8407	20.0076	32.5424	80.4841	23.3755	57.1086	28.1819	12.1928	21.3315	7.6624	4.52395	74.3013	32.4857	11.7799	21.6408	43.2991	17.1303	28.5739	80.3381	84.4865	87.1981	51.4269	48.8568	60.238	67.6068	29.0838	82.8213	74.1791	68.9557	87.5353	80.5774	95.8978	81.636	73.0058
LIM1863	Trait_AVG	K21	High	High	29.7595	3.4053	66.0278	7.65146	0.2535	8.5816	20.8683	17.3337	4.5574	10.1788	14.798	10.5081	31.0025	41.1973	79.4956	23.0493	56.4463	21.3109	12.5604	12.1291	6.8836	4.3457	69.996	20.8032	9.96585	11.4884	29.4604	16.115	16.1592	69.666	80.7852	85.8471	45.6607	30.2155	55.1829	66.012	31.1683	71.483	70.3392	68.5853	81.611	85.394	94.5064	66.5572	66.7767
SW403	Trait_AVG	L1	High	High	42.4301	6.5488	49.9629	7.76852	0.5129	9.21305	16.8299	13.9401	6.5069	10.7109	11.5028	9.8139	21.9493	34.9111	78.309	28.3442	49.9649	21.3836	9.09655	15.1427	5.7456	2.9683	68.3003	23.2471	8.84875	14.8496	34.4567	12.9663	22.2769	74.9634	84.1959	83.9467	53.1432	37.6581	55.4922	60.6618	28.689	67.2403	69.717	67.5089	71.3625	72.8725	95.3132	65.9578	69.1122
PCJW	Trait_AVG	K17	High	High	28.8292	4.0111	66.3727	7.64669	0.3575	11.6086	29.6463	15.011	3.4231	15.3138	19.2187	10.6867	18.266	40.5271	74.3791	24.5445	49.8346	29.9777	16.6461	18.3715	8.3225	4.8763	71.4483	26.5378	11.939	15.4374	36.6333	19.194	21.0977	64.1418	77.761	83.2505	50.8244	23.593	53.9919	63.0438	32.8295	72.7588	70.2441	71.5416	84.3374	86.9252	95.6931	65.5247	65.2287
RCM1	Trait_AVG	L15	High	Low	28.3476	2.801	68.207	7.96547	0.1986	7.33125	18.5569	17.0459	4.91595	9.12389	12.414	10.3866	38.812	41.3215	77.5414	20.5375	57.0039	20.3116	11.6061	11.573	6.78415	4.1838	69.5729	21.1916	9.4772	12.4337	30.0551	15.7113	17.4202	68.9333	83.1596	84.7729	48.8688	31.2349	59.579	67.7375	29.641	73.543	69.2793	67.8473	83.775	82.3655	92.3015	68.4089	66.6262
LS174T	Trait_AVG	I1	High	High	46.464	3.3438	49.2711	8.08022	0.2159	8.6019	13.1839	12.6136	12.2461	14.8333	15.1752	13.8594	28.5514	15.3242	80.289	20.1227	60.1664	12.5052	7.89795	6.1946	5.39745	3.86465	82.438	19.6759	13.4323	6.5042	24.0258	16.8754	7.8519	82.8947	88.4012	90.3361	60.4221	60.9368	73.517	69.3918	36.0555	90.395	80.6244	79.1717	92.7703	77.3799	97.4636	89.7937	81.0221
HCT116	Trait_AVG	I15	Low	Low	48.508	2.8544	47.8209	8.10029	0.304	12.0876	13.8846	12.3642	6.528	18.6671	22.2151	23.0265	26.7737	14.3819	28.5078	6.6502	21.8576	34.2556	17.2629	26.8247	3.1733	1.9737	88.3606	42.7188	16.7063	27.0338	48.1651	21.0204	30.2102	13.9163	28.827	33.0573	18.4748	6.45615	19.8555	25.4528	14.9962	93.7061	86.3164	85.6435	97.7157	93.662	99.3081	70.1701	67.701
CC20	Trait_AVG	J21	Low	Low	37.5741	1.9386	59.8066	7.93461	0.2674	13.7053	20.3935	17.4688	5.29935	24.3225	38.8602	29.6617	15.0657	10.3013	81.0555	60.5475	20.508	43.4003	32.961	25.3352	26.4155	2.2484	89.6927	50.6942	35.6362	23.3225	56.4596	42.1662	25.5296	79.0413	80.1641	88.0859	61.6985	9.2815	13.1639	26.7996	24.9457	94.2283	91.1796	84.1163	95.5588	91.8902	97.6989	93.8614	90.9942
OXCO1	Trait_AVG	J7	Low	Low	29.9275	3.4384	65.613	7.86025	0.2721	18.0687	20.3072	19.9519	4.68245	28.6762	34.5402	28.2071	11.95	9.04206	86.9811	63.3828	23.5984	44.0005	35.2851	20.2305	30.5829	3.52015	87.6985	45.5429	34.6536	18.2658	52.1323	42.0707	20.3862	85.7876	87.0822	92.8321	64.6907	15.2794	16.9	31.8487	24.1485	94.7208	88.6113	80.1501	94.1412	83.6029	97.5266	94.798	89.3471
CAR1	Trait_AVG	J11	Low	Low	50.3372	3.0279	45.7798	7.70943	0.2953	9.18575	12.0568	15.043	6.2252	17.5231	20.9213	25.2253	20.5713	13.533	80.5448	43.0562	37.4885	26.1142	19.8854	11.427	15.3425	4.30725	82.2863	43.749	33.777	13.6352	53.0409	42.2782	16.4711	79.9813	77.1597	88.0042	69.1182	29.5003	33.9103	39.3916	38.428	87.6224	79.3064	81.4257	93.2572	81.9069	96.4645	86.1833	78.5092
VACO429	Trait_AVG	K3	Low	Low	42.7123	3.6661	52.6777	7.88635	0.4865	10.9055	13.5686	15.6062	8.80295	17.2629	18.1369	19.9281	25.3448	12.9763	45.1959	12.8875	32.3085	32.3563	15.5364	24.5028	4.20125	2.5412	77.0196	35.7769	15.0338	21.901	45.9108	21.5101	27.7238	32.7302	46.0068	53.816	24.7461	14.5908	27.5201	42.8362	18.7231	86.6141	77.4368	70.2812	95.8636	86.4445	98.8166	68.0273	66.8662
ISRECO1	Trait_AVG	K7	Low	Low	38.3746	4.038	56.4179	8.029	0.6751	11.0254	14.4655	20.2396	7.34925	16.7058	22.7855	28.329	19.4876	11.3856	84.3697	39.164	45.2057	36.1037	18.1079	27.5065	14.0294	3.7229	82.523	38.877	19.3662	23.6273	47.1169	25.4443	28.0826	81.638	84.4758	91.0733	68.4905	35.8772	37.8814	51.2483	41.3667	88.7537	83.789	78.3003	92.1114	78.8399	97.243	87.941	84.6609
COLO678	Trait_AVG	K15	Low	Low	34.4171	3.1134	61.4336	7.43733	0.2692	14.3324	17.9152	17.5042	5.70535	22.5993	24.8674	22.3892	20.1264	21.1564	84.0977	40.6824	43.4153	33.1121	26.0509	12.7012	20.9987	6.27755	85.899	38.4468	30.2664	12.9486	44.7323	37.0252	14.9577	85.0514	84.0359	88.9885	68.1456	38.9957	42.5396	40.5066	34.1852	92.7013	83.1298	82.9082	95.1998	84.3017	94.7495	92.2395	82.9162
HDC8	Trait_AVG	J19	Low	Low	27.6716	3.2355	67.9717	6.49122	0.4471	14.1049	19.1092	21.3978	9.3204	17.3403	22.3434	25.3911	20.6051	14.0093	86.1002	48.382	37.7182	36.0757	17.6281	25.7528	13.6311	4.09385	83.3398	31.3669	15.37	18.6627	37.5508	19.213	22.3625	84.3881	85.8666	91.6673	77.7154	28.3785	35.4514	38.4612	42.4983	86.4777	80.1264	84.0312	92.4895	79.9197	96.0046	85.4794	80.1638
AVG CDX1 high					35.6372	4.04681	59.3343	7.81634	0.356294	9.01719	18.9838	15.6336	6.0582	11.933	14.5482	11.6177	27.073	32.6419	79.4008	25.2266	54.1742	21.4233	11.1043	13.5188	6.63193	4.09545	72.0626	22.6968	10.4134	12.8756	31.3398	15.5912	17.908	75.9023	83.7588	86.4707	55.0606	40.2255	58.5458	63.777	33.3432	76.7105	71.9007	69.6315	84.7844	79.4659	95.2191	73.5979	70.1443
AVG CDX1 low					38.6903	3.16404	57.1901	7.68106	0.377088	12.9269	16.4626	17.447	6.73912	20.3871	25.5838	25.2697	19.9906	13.3482	72.1066	39.3441	32.7625	35.6773	22.8397	21.7851	16.0468	3.58562	84.6024	40.8966	25.1012	19.9246	48.1386	31.341	23.2155	67.8168	71.7023	78.4406	56.635	22.2949	28.4028	37.0681	29.9114	90.6031	83.737	80.8571	94.5421	85.071	97.2265	84.8375	80.1448
Fold change high/low					0.921089	1.279	1.03749	1.01761	0.944857	0.69755	1.15315	0.896066	0.898961	0.585322	0.568651	0.459747	1.35429	2.4454	1.10116	0.641178	1.65354	0.600473	0.486183	0.620552	0.413286	1.14219	0.851779	0.55498	0.414857	0.646217	0.651033	0.497469	0.771382	1.11923	1.16815	1.10237	0.972202	1.80425	2.06127	1.72054	1.11473	0.846666	0.85865	0.861167	0.89679	0.934113	0.979354	0.867517	0.87522
P-value (MW.test)					0.382284	0.234499	0.441803	0.798446	0.505361	0.0029526	0.441803	0.160528	0.278632	0.0001554	0.0003108	0.0001554	0.0271617	0.0003108	0.234499	0.104895	0.0001554	0.000621601	0.0003108	0.0281274	0.104895	0.160528	0.000621601	0.0003108	0.0001554	0.0104118	0.0003108	0.0001554	0.130381	0.645377	0.278632	0.328205	0.234499	0.0206682	0.0001554	0.0001554	0.573737	0.0018648	0.0010878	0.0010878	0.000621601	0.104895	0.0206682	0.0379176	0.0281274
P-value (MW.test, bonferroni)					1	1	1	1	1	0.218493	1	1	1	0.0114996	0.0229992	0.0114996	1	0.0229992	1	1	0.0114996	0.0459984	0.0229992	1	1	1	0.0459984	0.0229992	0.0114996	0.770474	0.0229992	0.0114996	9.64817	1	1	1	1	1.52945	0.0114996	0.0114996	1	0.137995	0.0804973	0.0804973	0.0459984	1	1	1	1
[truncated: 28 more columns]

## Sheet: S4_TraitCalculations
Supplemental Table S4: Derived trait calculation. Derived traits were calculated using SPSS based on the given formulas. H, Hex = hexose; N, HexNAc = N-acetylhexosamine; E, (α2,6)NeuAc = (α2,6)N-acetylneuraminic acid; L, (α2,3)NeuAc = (α2,3)N-acetylneuraminic acid; F, dHex = fucose.
COMPUTE T = (1 * (H5N2 + H6N2 + H4N3F1 + H5N3 + H3N4F1 + H3N5 + H7N2 + H4N3F2 + H5N3F1 + H4N3E1 + H6N3 + H3N4F2 + H4N4F1 + H5N4 + H3N5F1 + H4N5 + H8N2 + H5N3F2 + H4N3E1F1 + H6N3F1 + H5N3E1 + H4N4F2 + H5N4F1 + H4N4E1 + H6N4 + H3N5F2 + H4N5F1 + H4N3L1F2
+ H5N5 + H5N3L1F1 + H3N6F1 + H9N2 + H6N3F2 + H7N3F1 + H5N4L1 + H6N3E1 + H5N4F2 + H4N4E1F1 + H6N4F1 + H5N4E1 + H4N5F2 + H5N5F1 + H4N5E1 + H6N5 + H3N6F2 + H6N3L1F1 + H4N6F1 + H10N2 + H5N4L1F1 + H6N3E1F1 + H6N4F2 + H4N5L1F1 + H5N4E1F1 + H4N5F3 + H5N5F2 +
H4N5E1F1 + H6N5F1 + H3N6F3 + H5N5E1 + H4N6F2 + H5N4L2 + H5N6F1 + H5N4L1F2 + H5N4F4 + H5N4L1E1 + H5N4E1F2 + H6N4E1F1 + H5N4E2 + H5N5F3 + H6N5F2 + H5N5E1F1 + H6N5E1 + H5N4L2F1 + H5N6F2 + H4N6E1F1 + H5N4L1F3 + H6N6F1 + H7N6 + H5N4L1E1F1 + H5N4E1F3 +
H5N4E2F1 + H5N5F4 + H5N5L1E1 + H6N5F3 + H5N5E1F2 + H6N5E1F1 + H5N5E2 + H5N6F3 + H6N6F2 + H5N6E1F1 + H7N6F1 + H6N6E1 + H5N7F2 + H6N5L2 + H5N5L1F3 + H6N7F1 + H6N5L1F2 + H7N7 + H6N5F4 + H6N5L1E1 + H5N5E1F3 + H6N5E1F2 + H6N6L1F1 + H5N6F4 + H9N5F1 + H6N5E2
+ H6N6F3 + H7N6F2 + H6N6E1F1 + H5N5L2F2 + H5N7F3 + H7N6E1 + H5N4L1E2F1 + H6N7F2 + H6N5L1F3 + H7N7F1 + H5N5L1E1F2 + H8N7 + H6N5L1E1F1 + H6N5E1F3 + H5N5E2F2 + H7N6L1F1 + H6N6F4 + H7N6F3 + H6N6E1F2 + H6N5L3 + H7N6E1F1 + H6N6E2 + H6N7F3 + H6N5L1F4 +
H7N7F2 + H6N5L2E1 + H8N7F1 + H6N5E1F4 + H6N5L1E2 + H7N8F1 + H7N6L1F2 + H8N8 + H7N6F4 + H7N6L1E1 + H6N6E1F3 + H6N5L3F1 + H7N6E1F2 + H6N7F4 + H7N6E2 + H7N7F3 + H6N5L2E1F1 + H8N7F2 + H6N5L1E1F3 + H8N7E1 + H6N5L1E2F1 + H7N8F2 + H8N8F1 + H5N5L3F3 + H9N8 +
H6N6E1F4 + H7N6E1F3 + H6N6E2F2 + H8N9 + H7N7F4 + H8N7F3 + H6N5L2E2 + H8N7E1F1 + H7N6L2F2 + H7N8F3 + H8N8F2 + H6N6L1E1F3 + H9N8F1 + H6N5E3F2 + H7N6E1F4 + H7N6L1E2 + H9N9 + H8N7F4 + H7N6E3 + H6N5L2E2F1 + H8N7E1F2 + H7N8F4 + H8N7E2 + H8N8F3 + H7N6L2E1F1
+ H9N8F2 + H6N5E3F3 + H9N8E1 + H7N6L1E2F1 + H9N9F1 + H10N9 + H7N6E3F1 + H7N6L3F2 + H8N7E1F3 + H7N6L3E1 + H8N8F4 + H9N8F3 + H7N6L2E2 + H9N8E1F1 + H9N9F2 + H7N6L1E3 + H7N6L4F1 + H10N9F1 + H6N5L2E3F1 + H10N10 + H9N8F4 + H8N7E3 + H7N6L2E2F1 + H9N8E2 +
H9N9F3 + H10N9F2 + H10N9E1 + H10N10F1 + H9N8F5 + H8N7L3E1 + H10N9F3 + H8N7L2E2 + H10N10F2 + H9N8L2E1)) / (1).
EXECUTE.
COMPUTE M = (1 * (H5N2 + H6N2 + H7N2 + H8N2 + H9N2 + H10N2)) / (1 * (H5N2 + H6N2 + H4N3F1 + H5N3 + H3N4F1 + H3N5 + H7N2 + H4N3F2 + H5N3F1 + H4N3E1 + H6N3 + H3N4F2 + H4N4F1 + H5N4 + H3N5F1 + H4N5 + H8N2 + H5N3F2 + H4N3E1F1 + H6N3F1 + H5N3E1 + H4N4F2 +
H5N4F1 + H4N4E1 + H6N4 + H3N5F2 + H4N5F1 + H4N3L1F2 + H5N5 + H5N3L1F1 + H3N6F1 + H9N2 + H6N3F2 + H7N3F1 + H5N4L1 + H6N3E1 + H5N4F2 + H4N4E1F1 + H6N4F1 + H5N4E1 + H4N5F2 + H5N5F1 + H4N5E1 + H6N5 + H3N6F2 + H6N3L1F1 + H4N6F1 + H10N2 + H5N4L1F1 +
H6N3E1F1 + H6N4F2 + H4N5L1F1 + H5N4E1F1 + H4N5F3 + H5N5F2 + H4N5E1F1 + H6N5F1 + H3N6F3 + H5N5E1 + H4N6F2 + H5N4L2 + H5N6F1 + H5N4L1F2 + H5N4F4 + H5N4L1E1 + H5N4E1F2 + H6N4E1F1 + H5N4E2 + H5N5F3 + H6N5F2 + H5N5E1F1 + H6N5E1 + H5N4L2F1 + H5N6F2 +
H4N6E1F1 + H5N4L1F3 + H6N6F1 + H7N6 + H5N4L1E1F1 + H5N4E1F3 + H5N4E2F1 + H5N5F4 + H5N5L1E1 + H6N5F3 + H5N5E1F2 + H6N5E1F1 + H5N5E2 + H5N6F3 + H6N6F2 + H5N6E1F1 + H7N6F1 + H6N6E1 + H5N7F2 + H6N5L2 + H5N5L1F3 + H6N7F1 + H6N5L1F2 + H7N7 + H6N5F4 +
H6N5L1E1 + H5N5E1F3 + H6N5E1F2 + H6N6L1F1 + H5N6F4 + H9N5F1 + H6N5E2 + H6N6F3 + H7N6F2 + H6N6E1F1 + H5N5L2F2 + H5N7F3 + H7N6E1 + H5N4L1E2F1 + H6N7F2 + H6N5L1F3 + H7N7F1 + H5N5L1E1F2 + H8N7 + H6N5L1E1F1 + H6N5E1F3 + H5N5E2F2 + H7N6L1F1 + H6N6F4 +
H7N6F3 + H6N6E1F2 + H6N5L3 + H7N6E1F1 + H6N6E2 + H6N7F3 + H6N5L1F4 + H7N7F2 + H6N5L2E1 + H8N7F1 + H6N5E1F4 + H6N5L1E2 + H7N8F1 + H7N6L1F2 + H8N8 + H7N6F4 + H7N6L1E1 + H6N6E1F3 + H6N5L3F1 + H7N6E1F2 + H6N7F4 + H7N6E2 + H7N7F3 + H6N5L2E1F1 + H8N7F2 +
H6N5L1E1F3 + H8N7E1 + H6N5L1E2F1 + H7N8F2 + H8N8F1 + H5N5L3F3 + H9N8 + H6N6E1F4 + H7N6E1F3 + H6N6E2F2 + H8N9 + H7N7F4 + H8N7F3 + H6N5L2E2 + H8N7E1F1 + H7N6L2F2 + H7N8F3 + H8N8F2 + H6N6L1E1F3 + H9N8F1 + H6N5E3F2 + H7N6E1F4 + H7N6L1E2 + H9N9 + H8N7F4 +
H7N6E3 + H6N5L2E2F1 + H8N7E1F2 + H7N8F4 + H8N7E2 + H8N8F3 + H7N6L2E1F1 + H9N8F2 + H6N5E3F3 + H9N8E1 + H7N6L1E2F1 + H9N9F1 + H10N9 + H7N6E3F1 + H7N6L3F2 + H8N7E1F3 + H7N6L3E1 + H8N8F4 + H9N8F3 + H7N6L2E2 + H9N8E1F1 + H9N9F2 + H7N6L1E3 + H7N6L4F1 +
H10N9F1 + H6N5L2E3F1 + H10N10 + H9N8F4 + H8N7E3 + H7N6L2E2F1 + H9N8E2 + H9N9F3 + H10N9F2 + H10N9E1 + H10N10F1 + H9N8F5 + H8N7L3E1 + H10N9F3 + H8N7L2E2 + H10N10F2 + H9N8L2E1)).
EXECUTE.
COMPUTE Hy = (1 * (H5N3 + H5N3F1 + H6N3 + H5N3F2 + H6N3F1 + H5N3E1 + H6N4 + H5N3L1F1 + H6N3F2 + H6N3E1 + H6N4F1 + H6N3L1F1 + H6N3E1F1 + H6N4F2 + H6N4E1F1)) / (1 * (H5N2 + H6N2 + H4N3F1 + H5N3 + H3N4F1 + H3N5 + H7N2 + H4N3F2 + H5N3F1 + H4N3E1 + H6N3 +
H3N4F2 + H4N4F1 + H5N4 + H3N5F1 + H4N5 + H8N2 + H5N3F2 + H4N3E1F1 + H6N3F1 + H5N3E1 + H4N4F2 + H5N4F1 + H4N4E1 + H6N4 + H3N5F2 + H4N5F1 + H4N3L1F2 + H5N5 + H5N3L1F1 + H3N6F1 + H9N2 + H6N3F2 + H7N3F1 + H5N4L1 + H6N3E1 + H5N4F2 + H4N4E1F1 + H6N4F1 +
H5N4E1 + H4N5F2 + H5N5F1 + H4N5E1 + H6N5 + H3N6F2 + H6N3L1F1 + H4N6F1 + H10N2 + H5N4L1F1 + H6N3E1F1 + H6N4F2 + H4N5L1F1 + H5N4E1F1 + H4N5F3 + H5N5F2 + H4N5E1F1 + H6N5F1 + H3N6F3 + H5N5E1 + H4N6F2 + H5N4L2 + H5N6F1 + H5N4L1F2 + H5N4F4 + H5N4L1E1 +
H5N4E1F2 + H6N4E1F1 + H5N4E2 + H5N5F3 + H6N5F2 + H5N5E1F1 + H6N5E1 + H5N4L2F1 + H5N6F2 + H4N6E1F1 + H5N4L1F3 + H6N6F1 + H7N6 + H5N4L1E1F1 + H5N4E1F3 + H5N4E2F1 + H5N5F4 + H5N5L1E1 + H6N5F3 + H5N5E1F2 + H6N5E1F1 + H5N5E2 + H5N6F3 + H6N6F2 + H5N6E1F1 +
H7N6F1 + H6N6E1 + H5N7F2 + H6N5L2 + H5N5L1F3 + H6N7F1 + H6N5L1F2 + H7N7 + H6N5F4 + H6N5L1E1 + H5N5E1F3 + H6N5E1F2 + H6N6L1F1 + H5N6F4 + H9N5F1 + H6N5E2 + H6N6F3 + H7N6F2 + H6N6E1F1 + H5N5L2F2 + H5N7F3 + H7N6E1 + H5N4L1E2F1 + H6N7F2 + H6N5L1F3 + H7N7F1
+ H5N5L1E1F2 + H8N7 + H6N5L1E1F1 + H6N5E1F3 + H5N5E2F2 + H7N6L1F1 + H6N6F4 + H7N6F3 + H6N6E1F2 + H6N5L3 + H7N6E1F1 + H6N6E2 + H6N7F3 + H6N5L1F4 + H7N7F2 + H6N5L2E1 + H8N7F1 + H6N5E1F4 + H6N5L1E2 + H7N8F1 + H7N6L1F2 + H8N8 + H7N6F4 + H7N6L1E1 +
H6N6E1F3 + H6N5L3F1 + H7N6E1F2 + H6N7F4 + H7N6E2 + H7N7F3 + H6N5L2E1F1 + H8N7F2 + H6N5L1E1F3 + H8N7E1 + H6N5L1E2F1 + H7N8F2 + H8N8F1 + H5N5L3F3 + H9N8 + H6N6E1F4 + H7N6E1F3 + H6N6E2F2 + H8N9 + H7N7F4 + H8N7F3 + H6N5L2E2 + H8N7E1F1 + H7N6L2F2 + H7N8F3
+ H8N8F2 + H6N6L1E1F3 + H9N8F1 + H6N5E3F2 + H7N6E1F4 + H7N6L1E2 + H9N9 + H8N7F4 + H7N6E3 + H6N5L2E2F1 + H8N7E1F2 + H7N8F4 + H8N7E2 + H8N8F3 + H7N6L2E1F1 + H9N8F2 + H6N5E3F3 + H9N8E1 + H7N6L1E2F1 + H9N9F1 + H10N9 + H7N6E3F1 + H7N6L3F2 + H8N7E1F3 +
H7N6L3E1 + H8N8F4 + H9N8F3 + H7N6L2E2 + H9N8E1F1 + H9N9F2 + H7N6L1E3 + H7N6L4F1 + H10N9F1 + H6N5L2E3F1 + H10N10 + H9N8F4 + H8N7E3 + H7N6L2E2F1 + H9N8E2 + H9N9F3 + H10N9F2 + H10N9E1 + H10N10F1 + H9N8F5 + H8N7L3E1 + H10N9F3 + H8N7L2E2 + H10N10F2 +
H9N8L2E1)).
EXECUTE.
COMPUTE C = (1 * (H3N4F1 + H3N5 + H3N4F2 + H4N4F1 + H5N4 + H3N5F1 + H4N5 + H4N4F2 + H5N4F1 + H4N4E1 + H3N5F2 + H4N5F1 + H5N5 + H3N6F1 + H5N4L1 + H5N4F2 + H4N4E1F1 + H5N4E1 + H4N5F2 + H5N5F1 + H4N5E1 + H6N5 + H3N6F2 + H4N6F1 + H5N4L1F1 + H4N5L1F1 +
H5N4E1F1 + H4N5F3 + H5N5F2 + H4N5E1F1 + H6N5F1 + H3N6F3 + H5N5E1 + H4N6F2 + H5N4L2 + H5N6F1 + H5N4L1F2 + H5N4F4 + H5N4L1E1 + H5N4E1F2 + H5N4E2 + H5N5F3 + H6N5F2 + H5N5E1F1 + H6N5E1 + H5N4L2F1 + H5N6F2 + H4N6E1F1 + H5N4L1F3 + H6N6F1 + H7N6 + H5N4L1E1F1
+ H5N4E1F3 + H5N4E2F1 + H5N5F4 + H5N5L1E1 + H6N5F3 + H5N5E1F2 + H6N5E1F1 + H5N5E2 + H5N6F3 + H6N6F2 + H5N6E1F1 + H7N6F1 + H6N6E1 + H5N7F2 + H6N5L2 + H5N5L1F3 + H6N7F1 + H6N5L1F2 + H7N7 + H6N5F4 + H6N5L1E1 + H5N5E1F3 + H6N5E1F2 + H6N6L1F1 + H5N6F4 +
H6N5E2 + H6N6F3 + H7N6F2 + H6N6E1F1 + H5N5L2F2 + H5N7F3 + H7N6E1 + H5N4L1E2F1 + H6N7F2 + H6N5L1F3 + H7N7F1 + H5N5L1E1F2 + H8N7 + H6N5L1E1F1 + H6N5E1F3 + H5N5E2F2 + H7N6L1F1 + H6N6F4 + H7N6F3 + H6N6E1F2 + H6N5L3 + H7N6E1F1 + H6N6E2 + H6N7F3 + H6N5L1F4
+ H7N7F2 + H6N5L2E1 + H8N7F1 + H6N5E1F4 + H6N5L1E2 + H7N8F1 + H7N6L1F2 + H8N8 + H7N6F4 + H7N6L1E1 + H6N6E1F3 + H6N5L3F1 + H7N6E1F2 + H6N7F4 + H7N6E2 + H7N7F3 + H6N5L2E1F1 + H8N7F2 + H6N5L1E1F3 + H8N7E1 + H6N5L1E2F1 + H7N8F2 + H8N8F1 + H5N5L3F3 + H9N8
+ H6N6E1F4 + H7N6E1F3 + H6N6E2F2 + H8N9 + H7N7F4 + H8N7F3 + H6N5L2E2 + H8N7E1F1 + H7N6L2F2 + H7N8F3 + H8N8F2 + H6N6L1E1F3 + H9N8F1 + H6N5E3F2 + H7N6E1F4 + H7N6L1E2 + H9N9 + H8N7F4 + H7N6E3 + H6N5L2E2F1 + H8N7E1F2 + H7N8F4 + H8N7E2 + H8N8F3 +
H7N6L2E1F1 + H9N8F2 + H6N5E3F3 + H9N8E1 + H7N6L1E2F1 + H9N9F1 + H10N9 + H7N6E3F1 + H7N6L3F2 + H8N7E1F3 + H7N6L3E1 + H8N8F4 + H9N8F3 + H7N6L2E2 + H9N8E1F1 + H9N9F2 + H7N6L1E3 + H7N6L4F1 + H10N9F1 + H6N5L2E3F1 + H10N10 + H9N8F4 + H8N7E3 + H7N6L2E2F1 +
H9N8E2 + H9N9F3 + H10N9F2 + H10N9E1 + H10N10F1 + H9N8F5 + H8N7L3E1 + H10N9F3 + H8N7L2E2 + H10N10F2 + H9N8L2E1)) / (1 * (H5N2 + H6N2 + H4N3F1 + H5N3 + H3N4F1 + H3N5 + H7N2 + H4N3F2 + H5N3F1 + H4N3E1 + H6N3 + H3N4F2 + H4N4F1 + H5N4 + H3N5F1 + H4N5 +
H8N2 + H5N3F2 + H4N3E1F1 + H6N3F1 + H5N3E1 + H4N4F2 + H5N4F1 + H4N4E1 + H6N4 + H3N5F2 + H4N5F1 + H4N3L1F2 + H5N5 + H5N3L1F1 + H3N6F1 + H9N2 + H6N3F2 + H7N3F1 + H5N4L1 + H6N3E1 + H5N4F2 + H4N4E1F1 + H6N4F1 + H5N4E1 + H4N5F2 + H5N5F1 + H4N5E1 + H6N5 +
H3N6F2 + H6N3L1F1 + H4N6F1 + H10N2 + H5N4L1F1 + H6N3E1F1 + H6N4F2 + H4N5L1F1 + H5N4E1F1 + H4N5F3 + H5N5F2 + H4N5E1F1 + H6N5F1 + H3N6F3 + H5N5E1 + H4N6F2 + H5N4L2 + H5N6F1 + H5N4L1F2 + H5N4F4 + H5N4L1E1 + H5N4E1F2 + H6N4E1F1 + H5N4E2 + H5N5F3 + H6N5F2
+ H5N5E1F1 + H6N5E1 + H5N4L2F1 + H5N6F2 + H4N6E1F1 + H5N4L1F3 + H6N6F1 + H7N6 + H5N4L1E1F1 + H5N4E1F3 + H5N4E2F1 + H5N5F4 + H5N5L1E1 + H6N5F3 + H5N5E1F2 + H6N5E1F1 + H5N5E2 + H5N6F3 + H6N6F2 + H5N6E1F1 + H7N6F1 + H6N6E1 + H5N7F2 + H6N5L2 + H5N5L1F3 +
H6N7F1 + H6N5L1F2 + H7N7 + H6N5F4 + H6N5L1E1 + H5N5E1F3 + H6N5E1F2 + H6N6L1F1 + H5N6F4 + H9N5F1 + H6N5E2 + H6N6F3 + H7N6F2 + H6N6E1F1 + H5N5L2F2 + H5N7F3 + H7N6E1 + H5N4L1E2F1 + H6N7F2 + H6N5L1F3 + H7N7F1 + H5N5L1E1F2 + H8N7 + H6N5L1E1F1 + H6N5E1F3 +
H5N5E2F2 + H7N6L1F1 + H6N6F4 + H7N6F3 + H6N6E1F2 + H6N5L3 + H7N6E1F1 + H6N6E2 + H6N7F3 + H6N5L1F4 + H7N7F2 + H6N5L2E1 + H8N7F1 + H6N5E1F4 + H6N5L1E2 + H7N8F1 + H7N6L1F2 + H8N8 + H7N6F4 + H7N6L1E1 + H6N6E1F3 + H6N5L3F1 + H7N6E1F2 + H6N7F4 + H7N6E2 +
H7N7F3 + H6N5L2E1F1 + H8N7F2 + H6N5L1E1F3 + H8N7E1 + H6N5L1E2F1 + H7N8F2 + H8N8F1 + H5N5L3F3 + H9N8 + H6N6E1F4 + H7N6E1F3 + H6N6E2F2 + H8N9 + H7N7F4 + H8N7F3 + H6N5L2E2 + H8N7E1F1 + H7N6L2F2 + H7N8F3 + H8N8F2 + H6N6L1E1F3 + H9N8F1 + H6N5E3F2 +
H7N6E1F4 + H7N6L1E2 + H9N9 + H8N7F4 + H7N6E3 + H6N5L2E2F1 + H8N7E1F2 + H7N8F4 + H8N7E2 + H8N8F3 + H7N6L2E1F1 + H9N8F2 + H6N5E3F3 + H9N8E1 + H7N6L1E2F1 + H9N9F1 + H10N9 + H7N6E3F1 + H7N6L3F2 + H8N7E1F3 + H7N6L3E1 + H8N8F4 + H9N8F3 + H7N6L2E2 + H9N8E1F1
+ H9N9F2 + H7N6L1E3 + H7N6L4F1 + H10N9F1 + H6N5L2E3F1 + H10N10 + H9N8F4 + H8N7E3 + H7N6L2E2F1 + H9N8E2 + H9N9F3 + H10N9F2 + H10N9E1 + H10N10F1 + H9N8F5 + H8N7L3E1 + H10N9F3 + H8N7L2E2 + H10N10F2 + H9N8L2E1)).
EXECUTE.
COMPUTE A1 = (1 * (H4N3E1 + H4N3E1F1 + H4N3L1F2)) / (1 * (H5N2 + H6N2 + H4N3F1 + H5N3 + H3N4F1 + H3N5 + H7N2 + H4N3F2 + H5N3F1 + H4N3E1 + H6N3 + H3N4F2 + H4N4F1 + H5N4 + H3N5F1 + H4N5 + H8N2 + H5N3F2 + H4N3E1F1 + H6N3F1 + H5N3E1 + H4N4F2 + H5N4F1 +
H4N4E1 + H6N4 + H3N5F2 + H4N5F1 + H4N3L1F2 + H5N5 + H5N3L1F1 + H3N6F1 + H9N2 + H6N3F2 + H7N3F1 + H5N4L1 + H6N3E1 + H5N4F2 + H4N4E1F1 + H6N4F1 + H5N4E1 + H4N5F2 + H5N5F1 + H4N5E1 + H6N5 + H3N6F2 + H6N3L1F1 + H4N6F1 + H10N2 + H5N4L1F1 + H6N3E1F1 +
H6N4F2 + H4N5L1F1 + H5N4E1F1 + H4N5F3 + H5N5F2 + H4N5E1F1 + H6N5F1 + H3N6F3 + H5N5E1 + H4N6F2 + H5N4L2 + H5N6F1 + H5N4L1F2 + H5N4F4 + H5N4L1E1 + H5N4E1F2 + H6N4E1F1 + H5N4E2 + H5N5F3 + H6N5F2 + H5N5E1F1 + H6N5E1 + H5N4L2F1 + H5N6F2 + H4N6E1F1 +
H5N4L1F3 + H6N6F1 + H7N6 + H5N4L1E1F1 + H5N4E1F3 + H5N4E2F1 + H5N5F4 + H5N5L1E1 + H6N5F3 + H5N5E1F2 + H6N5E1F1 + H5N5E2 + H5N6F3 + H6N6F2 + H5N6E1F1 + H7N6F1 + H6N6E1 + H5N7F2 + H6N5L2 + H5N5L1F3 + H6N7F1 + H6N5L1F2 + H7N7 + H6N5F4 + H6N5L1E1 +
H5N5E1F3 + H6N5E1F2 + H6N6L1F1 + H5N6F4 + H9N5F1 + H6N5E2 + H6N6F3 + H7N6F2 + H6N6E1F1 + H5N5L2F2 + H5N7F3 + H7N6E1 + H5N4L1E2F1 + H6N7F2 + H6N5L1F3 + H7N7F1 + H5N5L1E1F2 + H8N7 + H6N5L1E1F1 + H6N5E1F3 + H5N5E2F2 + H7N6L1F1 + H6N6F4 + H7N6F3 +
H6N6E1F2 + H6N5L3 + H7N6E1F1 + H6N6E2 + H6N7F3 + H6N5L1F4 + H7N7F2 + H6N5L2E1 + H8N7F1 + H6N5E1F4 + H6N5L1E2 + H7N8F1 + H7N6L1F2 + H8N8 + H7N6F4 + H7N6L1E1 + H6N6E1F3 + H6N5L3F1 + H7N6E1F2 + H6N7F4 + H7N6E2 + H7N7F3 + H6N5L2E1F1 + H8N7F2 + H6N5L1E1F3
+ H8N7E1 + H6N5L1E2F1 + H7N8F2 + H8N8F1 + H5N5L3F3 + H9N8 + H6N6E1F4 + H7N6E1F3 + H6N6E2F2 + H8N9 + H7N7F4 + H8N7F3 + H6N5L2E2 + H8N7E1F1 + H7N6L2F2 + H7N8F3 + H8N8F2 + H6N6L1E1F3 + H9N8F1 + H6N5E3F2 + H7N6E1F4 + H7N6L1E2 + H9N9 + H8N7F4 + H7N6E3 +
H6N5L2E2F1 + H8N7E1F2 + H7N8F4 + H8N7E2 + H8N8F3 + H7N6L2E1F1 + H9N8F2 + H6N5E3F3 + H9N8E1 + H7N6L1E2F1 + H9N9F1 + H10N9 + H7N6E3F1 + H7N6L3F2 + H8N7E1F3 + H7N6L3E1 + H8N8F4 + H9N8F3 + H7N6L2E2 + H9N8E1F1 + H9N9F2 + H7N6L1E3 + H7N6L4F1 + H10N9F1 +
H6N5L2E3F1 + H10N10 + H9N8F4 + H8N7E3 + H7N6L2E2F1 + H9N8E2 + H9N9F3 + H10N9F2 + H10N9E1 + H10N10F1 + H9N8F5 + H8N7L3E1 + H10N9F3 + H8N7L2E2 + H10N10F2 + H9N8L2E1)).
EXECUTE.
COMPUTE A2 = (1 * (H3N4F1 + H3N4F2 + H4N4F1 + H5N4 + H4N4F2 + H5N4F1 + H4N4E1 + H6N4 + H5N4L1 + H5N4F2 + H4N4E1F1 + H6N4F1 + H5N4E1 + H5N4L1F1 + H6N4F2 + H5N4E1F1 + H5N4L2 + H5N4L1F2 + H5N4F4 + H5N4L1E1 + H5N4E1F2 + H6N4E1F1 + H5N4E2 + H5N4L2F1 +
H5N4L1F3 + H5N4L1E1F1 + H5N4E1F3 + H5N4E2F1 + H5N4L1E2F1)) / (1 * (H5N2 + H6N2 + H4N3F1 + H5N3 + H3N4F1 + H3N5 + H7N2 + H4N3F2 + H5N3F1 + H4N3E1 + H6N3 + H3N4F2 + H4N4F1 + H5N4 + H3N5F1 + H4N5 + H8N2 + H5N3F2 + H4N3E1F1 + H6N3F1 + H5N3E1 + H4N4F2 +
H5N4F1 + H4N4E1 + H6N4 + H3N5F2 + H4N5F1 + H4N3L1F2 + H5N5 + H5N3L1F1 + H3N6F1 + H9N2 + H6N3F2 + H7N3F1 + H5N4L1 + H6N3E1 + H5N4F2 + H4N4E1F1 + H6N4F1 + H5N4E1 + H4N5F2 + H5N5F1 + H4N5E1 + H6N5 + H3N6F2 + H6N3L1F1 + H4N6F1 + H10N2 + H5N4L1F1 +
H6N3E1F1 + H6N4F2 + H4N5L1F1 + H5N4E1F1 + H4N5F3 + H5N5F2 + H4N5E1F1 + H6N5F1 + H3N6F3 + H5N5E1 + H4N6F2 + H5N4L2 + H5N6F1 + H5N4L1F2 + H5N4F4 + H5N4L1E1 + H5N4E1F2 + H6N4E1F1 + H5N4E2 + H5N5F3 + H6N5F2 + H5N5E1F1 + H6N5E1 + H5N4L2F1 + H5N6F2 +
H4N6E1F1 + H5N4L1F3 + H6N6F1 + H7N6 + H5N4L1E1F1 + H5N4E1F3 + H5N4E2F1 + H5N5F4 + H5N5L1E1 + H6N5F3 + H5N5E1F2 + H6N5E1F1 + H5N5E2 + H5N6F3 + H6N6F2 + H5N6E1F1 + H7N6F1 + H6N6E1 + H5N7F2 + H6N5L2 + H5N5L1F3 + H6N7F1 + H6N5L1F2 + H7N7 + H6N5F4 +
H6N5L1E1 + H5N5E1F3 + H6N5E1F2 + H6N6L1F1 + H5N6F4 + H9N5F1 + H6N5E2 + H6N6F3 + H7N6F2 + H6N6E1F1 + H5N5L2F2 + H5N7F3 + H7N6E1 + H5N4L1E2F1 + H6N7F2 + H6N5L1F3 + H7N7F1 + H5N5L1E1F2 + H8N7 + H6N5L1E1F1 + H6N5E1F3 + H5N5E2F2 + H7N6L1F1 + H6N6F4 +
H7N6F3 + H6N6E1F2 + H6N5L3 + H7N6E1F1 + H6N6E2 + H6N7F3 + H6N5L1F4 + H7N7F2 + H6N5L2E1 + H8N7F1 + H6N5E1F4 + H6N5L1E2 + H7N8F1 + H7N6L1F2 + H8N8 + H7N6F4 + H7N6L1E1 + H6N6E1F3 + H6N5L3F1 + H7N6E1F2 + H6N7F4 + H7N6E2 + H7N7F3 + H6N5L2E1F1 + H8N7F2 +
H6N5L1E1F3 + H8N7E1 + H6N5L1E2F1 + H7N8F2 + H8N8F1 + H5N5L3F3 + H9N8 + H6N6E1F4 + H7N6E1F3 + H6N6E2F2 + H8N9 + H7N7F4 + H8N7F3 + H6N5L2E2 + H8N7E1F1 + H7N6L2F2 + H7N8F3 + H8N8F2 + H6N6L1E1F3 + H9N8F1 + H6N5E3F2 + H7N6E1F4 + H7N6L1E2 + H9N9 + H8N7F4 +
H7N6E3 + H6N5L2E2F1 + H8N7E1F2 + H7N8F4 + H8N7E2 + H8N8F3 + H7N6L2E1F1 + H9N8F2 + H6N5E3F3 + H9N8E1 + H7N6L1E2F1 + H9N9F1 + H10N9 + H7N6E3F1 + H7N6L3F2 + H8N7E1F3 + H7N6L3E1 + H8N8F4 + H9N8F3 + H7N6L2E2 + H9N8E1F1 + H9N9F2 + H7N6L1E3 + H7N6L4F1 +
H10N9F1 + H6N5L2E3F1 + H10N10 + H9N8F4 + H8N7E3 + H7N6L2E2F1 + H9N8E2 + H9N9F3 + H10N9F2 + H10N9E1 + H10N10F1 + H9N8F5 + H8N7L3E1 + H10N9F3 + H8N7L2E2 + H10N10F2 + H9N8L2E1)).
EXECUTE.
COMPUTE A3 = (1 * (H3N5 + H3N5F1 + H4N5 + H3N5F2 + H4N5F1 + H5N5 + H4N5F2 + H5N5F1 + H4N5E1 + H6N5 + H4N5L1F1 + H4N5F3 + H5N5F2 + H4N5E1F1 + H6N5F1 + H5N5E1 + H5N5F3 + H6N5F2 + H5N5E1F1 + H6N5E1 + H5N5F4 + H5N5L1E1 + H6N5F3 + H5N5E1F2 + H6N5E1F1 +
H5N5E2 + H6N5L2 + H5N5L1F3 + H6N5L1F2 + H6N5F4 + H6N5L1E1 + H5N5E1F3 + H6N5E1F2 + H9N5F1 + H6N5E2 + H5N5L2F2 + H6N5L1F3 + H5N5L1E1F2 + H6N5L1E1F1 + H6N5E1F3 + H5N5E2F2 + H6N5L3 + H6N5L1F4 + H6N5L2E1 + H6N5E1F4 + H6N5L1E2 + H6N5L3F1 + H6N5L2E1F1 +
H6N5L1E1F3 + H6N5L1E2F1 + H5N5L3F3 + H6N5L2E2 + H6N5E3F2 + H6N5L2E2F1 + H6N5E3F3 + H6N5L2E3F1)) / (1 * (H5N2 + H6N2 + H4N3F1 + H5N3 + H3N4F1 + H3N5 + H7N2 + H4N3F2 + H5N3F1 + H4N3E1 + H6N3 + H3N4F2 + H4N4F1 + H5N4 + H3N5F1 + H4N5 + H8N2 + H5N3F2 +
H4N3E1F1 + H6N3F1 + H5N3E1 + H4N4F2 + H5N4F1 + H4N4E1 + H6N4 + H3N5F2 + H4N5F1 + H4N3L1F2 + H5N5 + H5N3L1F1 + H3N6F1 + H9N2 + H6N3F2 + H7N3F1 + H5N4L1 + H6N3E1 + H5N4F2 + H4N4E1F1 + H6N4F1 + H5N4E1 + H4N5F2 + H5N5F1 + H4N5E1 + H6N5 + H3N6F2 + H6N3L1F1
+ H4N6F1 + H10N2 + H5N4L1F1 + H6N3E1F1 + H6N4F2 + H4N5L1F1 + H5N4E1F1 + H4N5F3 + H5N5F2 + H4N5E1F1 + H6N5F1 + H3N6F3 + H5N5E1 + H4N6F2 + H5N4L2 + H5N6F1 + H5N4L1F2 + H5N4F4 + H5N4L1E1 + H5N4E1F2 + H6N4E1F1 + H5N4E2 + H5N5F3 + H6N5F2 + H5N5E1F1 +
H6N5E1 + H5N4L2F1 + H5N6F2 + H4N6E1F1 + H5N4L1F3 + H6N6F1 + H7N6 + H5N4L1E1F1 + H5N4E1F3 + H5N4E2F1 + H5N5F4 + H5N5L1E1 + H6N5F3 + H5N5E1F2 + H6N5E1F1 + H5N5E2 + H5N6F3 + H6N6F2 + H5N6E1F1 + H7N6F1 + H6N6E1 + H5N7F2 + H6N5L2 + H5N5L1F3 + H6N7F1 +
H6N5L1F2 + H7N7 + H6N5F4 + H6N5L1E1 + H5N5E1F3 + H6N5E1F2 + H6N6L1F1 + H5N6F4 + H9N5F1 + H6N5E2 + H6N6F3 + H7N6F2 + H6N6E1F1 + H5N5L2F2 + H5N7F3 + H7N6E1 + H5N4L1E2F1 + H6N7F2 + H6N5L1F3 + H7N7F1 + H5N5L1E1F2 + H8N7 + H6N5L1E1F1 + H6N5E1F3 + H5N5E2F2
+ H7N6L1F1 + H6N6F4 + H7N6F3 + H6N6E1F2 + H6N5L3 + H7N6E1F1 + H6N6E2 + H6N7F3 + H6N5L1F4 + H7N7F2 + H6N5L2E1 + H8N7F1 + H6N5E1F4 + H6N5L1E2 + H7N8F1 + H7N6L1F2 + H8N8 + H7N6F4 + H7N6L1E1 + H6N6E1F3 + H6N5L3F1 + H7N6E1F2 + H6N7F4 + H7N6E2 + H7N7F3 +
H6N5L2E1F1 + H8N7F2 + H6N5L1E1F3 + H8N7E1 + H6N5L1E2F1 + H7N8F2 + H8N8F1 + H5N5L3F3 + H9N8 + H6N6E1F4 + H7N6E1F3 + H6N6E2F2 + H8N9 + H7N7F4 + H8N7F3 + H6N5L2E2 + H8N7E1F1 + H7N6L2F2 + H7N8F3 + H8N8F2 + H6N6L1E1F3 + H9N8F1 + H6N5E3F2 + H7N6E1F4 +
H7N6L1E2 + H9N9 + H8N7F4 + H7N6E3 + H6N5L2E2F1 + H8N7E1F2 + H7N8F4 + H8N7E2 + H8N8F3 + H7N6L2E1F1 + H9N8F2 + H6N5E3F3 + H9N8E1 + H7N6L1E2F1 + H9N9F1 + H10N9 + H7N6E3F1 + H7N6L3F2 + H8N7E1F3 + H7N6L3E1 + H8N8F4 + H9N8F3 + H7N6L2E2 + H9N8E1F1 + H9N9F2 +
H7N6L1E3 + H7N6L4F1 + H10N9F1 + H6N5L2E3F1 + H10N10 + H9N8F4 + H8N7E3 + H7N6L2E2F1 + H9N8E2 + H9N9F3 + H10N9F2 + H10N9E1 + H10N10F1 + H9N8F5 + H8N7L3E1 + H10N9F3 + H8N7L2E2 + H10N10F2 + H9N8L2E1)).
EXECUTE.
COMPUTE A4 = (1 * (H3N6F1 + H3N6F2 + H4N6F1 + H3N6F3 + H4N6F2 + H5N6F1 + H5N6F2 + H4N6E1F1 + H6N6F1 + H7N6 + H5N6F3 + H6N6F2 + H5N6E1F1 + H7N6F1 + H6N6E1 + H6N6L1F1 + H5N6F4 + H6N6F3 + H7N6F2 + H6N6E1F1 + H7N6E1 + H7N6L1F1 + H6N6F4 + H7N6F3 + H6N6E1F2
+ H7N6E1F1 + H6N6E2 + H7N6L1F2 + H7N6F4 + H7N6L1E1 + H6N6E1F3 + H7N6E1F2 + H7N6E2 + H6N6E1F4 + H7N6E1F3 + H6N6E2F2 + H7N6L2F2 + H6N6L1E1F3 + H7N6E1F4 + H7N6L1E2 + H7N6E3 + H7N6L2E1F1 + H7N6L1E2F1 + H7N6E3F1 + H7N6L3F2 + H7N6L3E1 + H7N6L2E2 + H7N6L1E3
+ H7N6L4F1 + H7N6L2E2F1)) / (1 * (H5N2 + H6N2 + H4N3F1 + H5N3 + H3N4F1 + H3N5 + H7N2 + H4N3F2 + H5N3F1 + H4N3E1 + H6N3 + H3N4F2 + H4N4F1 + H5N4 + H3N5F1 + H4N5 + H8N2 + H5N3F2 + H4N3E1F1 + H6N3F1 + H5N3E1 + H4N4F2 + H5N4F1 + H4N4E1 + H6N4 + H3N5F2 +
H4N5F1 + H4N3L1F2 + H5N5 + H5N3L1F1 + H3N6F1 + H9N2 + H6N3F2 + H7N3F1 + H5N4L1 + H6N3E1 + H5N4F2 + H4N4E1F1 + H6N4F1 + H5N4E1 + H4N5F2 + H5N5F1 + H4N5E1 + H6N5 + H3N6F2 + H6N3L1F1 + H4N6F1 + H10N2 + H5N4L1F1 + H6N3E1F1 + H6N4F2 + H4N5L1F1 + H5N4E1F1 +
H4N5F3 + H5N5F2 + H4N5E1F1 + H6N5F1 + H3N6F3 + H5N5E1 + H4N6F2 + H5N4L2 + H5N6F1 + H5N4L1F2 + H5N4F4 + H5N4L1E1 + H5N4E1F2 + H6N4E1F1 + H5N4E2 + H5N5F3 + H6N5F2 + H5N5E1F1 + H6N5E1 + H5N4L2F1 + H5N6F2 + H4N6E1F1 + H5N4L1F3 + H6N6F1 + H7N6 + H5N4L1E1F1
+ H5N4E1F3 + H5N4E2F1 + H5N5F4 + H5N5L1E1 + H6N5F3 + H5N5E1F2 + H6N5E1F1 + H5N5E2 + H5N6F3 + H6N6F2 + H5N6E1F1 + H7N6F1 + H6N6E1 + H5N7F2 + H6N5L2 + H5N5L1F3 + H6N7F1 + H6N5L1F2 + H7N7 + H6N5F4 + H6N5L1E1 + H5N5E1F3 + H6N5E1F2 + H6N6L1F1 + H5N6F4 +
H9N5F1 + H6N5E2 + H6N6F3 + H7N6F2 + H6N6E1F1 + H5N5L2F2 + H5N7F3 + H7N6E1 + H5N4L1E2F1 + H6N7F2 + H6N5L1F3 + H7N7F1 + H5N5L1E1F2 + H8N7 + H6N5L1E1F1 + H6N5E1F3 + H5N5E2F2 + H7N6L1F1 + H6N6F4 + H7N6F3 + H6N6E1F2 + H6N5L3 + H7N6E1F1 + H6N6E2 + H6N7F3 +
H6N5L1F4 + H7N7F2 + H6N5L2E1 + H8N7F1 + H6N5E1F4 + H6N5L1E2 + H7N8F1 + H7N6L1F2 + H8N8 + H7N6F4 + H7N6L1E1 + H6N6E1F3 + H6N5L3F1 + H7N6E1F2 + H6N7F4 + H7N6E2 + H7N7F3 + H6N5L2E1F1 + H8N7F2 + H6N5L1E1F3 + H8N7E1 + H6N5L1E2F1 + H7N8F2 + H8N8F1 +
H5N5L3F3 + H9N8 + H6N6E1F4 + H7N6E1F3 + H6N6E2F2 + H8N9 + H7N7F4 + H8N7F3 + H6N5L2E2 + H8N7E1F1 + H7N6L2F2 + H7N8F3 + H8N8F2 + H6N6L1E1F3 + H9N8F1 + H6N5E3F2 + H7N6E1F4 + H7N6L1E2 + H9N9 + H8N7F4 + H7N6E3 + H6N5L2E2F1 + H8N7E1F2 + H7N8F4 + H8N7E2 +
H8N8F3 + H7N6L2E1F1 + H9N8F2 + H6N5E3F3 + H9N8E1 + H7N6L1E2F1 + H9N9F1 + H10N9 + H7N6E3F1 + H7N6L3F2 + H8N7E1F3 + H7N6L3E1 + H8N8F4 + H9N8F3 + H7N6L2E2 + H9N8E1F1 + H9N9F2 + H7N6L1E3 + H7N6L4F1 + H10N9F1 + H6N5L2E3F1 + H10N10 + H9N8F4 + H8N7E3 +
H7N6L2E2F1 + H9N8E2 + H9N9F3 + H10N9F2 + H10N9E1 + H10N10F1 + H9N8F5 + H8N7L3E1 + H10N9F3 + H8N7L2E2 + H10N10F2 + H9N8L2E1)).
EXECUTE.
COMPUTE ALN = (1 * (H8N7 + H8N7F1 + H8N7F2 + H8N7E1 + H9N8 + H8N7F3 + H8N7E1F1 + H9N8F1 + H8N7F4 + H8N7E1F2 + H8N7E2 + H9N8F2 + H9N8E1 + H10N9 + H8N7E1F3 + H9N8F3 + H9N8E1F1 + H10N9F1 + H9N8F4 + H8N7E3 + H9N8E2 + H10N9F2 + H10N9E1 + H9N8F5 + H8N7L3E1
+ H10N9F3 + H8N7L2E2 + H9N8L2E1)) / (1 * (H5N2 + H6N2 + H4N3F1 + H5N3 + H3N4F1 + H3N5 + H7N2 + H4N3F2 + H5N3F1 + H4N3E1 + H6N3 + H3N4F2 + H4N4F1 + H5N4 + H3N5F1 + H4N5 + H8N2 + H5N3F2 + H4N3E1F1 + H6N3F1 + H5N3E1 + H4N4F2 + H5N4F1 + H4N4E1 + H6N4 +
H3N5F2 + H4N5F1 + H4N3L1F2 + H5N5 + H5N3L1F1 + H3N6F1 + H9N2 + H6N3F2 + H7N3F1 + H5N4L1 + H6N3E1 + H5N4F2 + H4N4E1F1 + H6N4F1 + H5N4E1 + H4N5F2 + H5N5F1 + H4N5E1 + H6N5 + H3N6F2 + H6N3L1F1 + H4N6F1 + H10N2 + H5N4L1F1 + H6N3E1F1 + H6N4F2 + H4N5L1F1 +
H5N4E1F1 + H4N5F3 + H5N5F2 + H4N5E1F1 + H6N5F1 + H3N6F3 + H5N5E1 + H4N6F2 + H5N4L2 + H5N6F1 + H5N4L1F2 + H5N4F4 + H5N4L1E1 + H5N4E1F2 + H6N4E1F1 + H5N4E2 + H5N5F3 + H6N5F2 + H5N5E1F1 + H6N5E1 + H5N4L2F1 + H5N6F2 + H4N6E1F1 + H5N4L1F3 + H6N6F1 + H7N6 +
H5N4L1E1F1 + H5N4E1F3 + H5N4E2F1 + H5N5F4 + H5N5L1E1 + H6N5F3 + H5N5E1F2 + H6N5E1F1 + H5N5E2 + H5N6F3 + H6N6F2 + H5N6E1F1 + H7N6F1 + H6N6E1 + H5N7F2 + H6N5L2 + H5N5L1F3 + H6N7F1 + H6N5L1F2 + H7N7 + H6N5F4 + H6N5L1E1 + H5N5E1F3 + H6N5E1F2 + H6N6L1F1 +
H5N6F4 + H9N5F1 + H6N5E2 + H6N6F3 + H7N6F2 + H6N6E1F1 + H5N5L2F2 + H5N7F3 + H7N6E1 + H5N4L1E2F1 + H6N7F2 + H6N5L1F3 + H7N7F1 + H5N5L1E1F2 + H8N7 + H6N5L1E1F1 + H6N5E1F3 + H5N5E2F2 + H7N6L1F1 + H6N6F4 + H7N6F3 + H6N6E1F2 + H6N5L3 + H7N6E1F1 + H6N6E2 +
H6N7F3 + H6N5L1F4 + H7N7F2 + H6N5L2E1 + H8N7F1 + H6N5E1F4 + H6N5L1E2 + H7N8F1 + H7N6L1F2 + H8N8 + H7N6F4 + H7N6L1E1 + H6N6E1F3 + H6N5L3F1 + H7N6E1F2 + H6N7F4 + H7N6E2 + H7N7F3 + H6N5L2E1F1 + H8N7F2 + H6N5L1E1F3 + H8N7E1 + H6N5L1E2F1 + H7N8F2 + H8N8F1
+ H5N5L3F3 + H9N8 + H6N6E1F4 + H7N6E1F3 + H6N6E2F2 + H8N9 + H7N7F4 + H8N7F3 + H6N5L2E2 + H8N7E1F1 + H7N6L2F2 + H7N8F3 + H8N8F2 + H6N6L1E1F3 + H9N8F1 + H6N5E3F2 + H7N6E1F4 + H7N6L1E2 + H9N9 + H8N7F4 + H7N6E3 + H6N5L2E2F1 + H8N7E1F2 + H7N8F4 + H8N7E2 +
H8N8F3 + H7N6L2E1F1 + H9N8F2 + H6N5E3F3 + H9N8E1 + H7N6L1E2F1 + H9N9F1 + H10N9 + H7N6E3F1 + H7N6L3F2 + H8N7E1F3 + H7N6L3E1 + H8N8F4 + H9N8F3 + H7N6L2E2 + H9N8E1F1 + H9N9F2 + H7N6L1E3 + H7N6L4F1 + H10N9F1 + H6N5L2E3F1 + H10N10 + H9N8F4 + H8N7E3 +
H7N6L2E2F1 + H9N8E2 + H9N9F3 + H10N9F2 + H10N9E1 + H10N10F1 + H9N8F5 + H8N7L3E1 + H10N9F3 + H8N7L2E2 + H10N10F2 + H9N8L2E1)).
EXECUTE.
COMPUTE CA1 = (1 * (0)) / (1 * (H3N4F1 + H3N5 + H3N4F2 + H4N4F1 + H5N4 + H3N5F1 + H4N5 + H4N4F2 + H5N4F1 + H4N4E1 + H3N5F2 + H4N5F1 + H5N5 + H3N6F1 + H5N4L1 + H5N4F2 + H4N4E1F1 + H5N4E1 + H4N5F2 + H5N5F1 + H4N5E1 + H6N5 + H3N6F2 + H4N6F1 + H5N4L1F1 +
H4N5L1F1 + H5N4E1F1 + H4N5F3 + H5N5F2 + H4N5E1F1 + H6N5F1 + H3N6F3 + H5N5E1 + H4N6F2 + H5N4L2 + H5N6F1 + H5N4L1F2 + H5N4F4 + H5N4L1E1 + H5N4E1F2 + H5N4E2 + H5N5F3 + H6N5F2 + H5N5E1F1 + H6N5E1 + H5N4L2F1 + H5N6F2 + H4N6E1F1 + H5N4L1F3 + H6N6F1 + H7N6 +
H5N4L1E1F1 + H5N4E1F3 + H5N4E2F1 + H5N5F4 + H5N5L1E1 + H6N5F3 + H5N5E1F2 + H6N5E1F1 + H5N5E2 + H5N6F3 + H6N6F2 + H5N6E1F1 + H7N6F1 + H6N6E1 + H5N7F2 + H6N5L2 + H5N5L1F3 + H6N7F1 + H6N5L1F2 + H7N7 + H6N5F4 + H6N5L1E1 + H5N5E1F3 + H6N5E1F2 + H6N6L1F1 +
H5N6F4 + H6N5E2 + H6N6F3 + H7N6F2 + H6N6E1F1 + H5N5L2F2 + H5N7F3 + H7N6E1 + H5N4L1E2F1 + H6N7F2 + H6N5L1F3 + H7N7F1 + H5N5L1E1F2 + H8N7 + H6N5L1E1F1 + H6N5E1F3 + H5N5E2F2 + H7N6L1F1 + H6N6F4 + H7N6F3 + H6N6E1F2 + H6N5L3 + H7N6E1F1 + H6N6E2 + H6N7F3 +
H6N5L1F4 + H7N7F2 + H6N5L2E1 + H8N7F1 + H6N5E1F4 + H6N5L1E2 + H7N8F1 + H7N6L1F2 + H8N8 + H7N6F4 + H7N6L1E1 + H6N6E1F3 + H6N5L3F1 + H7N6E1F2 + H6N7F4 + H7N6E2 + H7N7F3 + H6N5L2E1F1 + H8N7F2 + H6N5L1E1F3 + H8N7E1 + H6N5L1E2F1 + H7N8F2 + H8N8F1 +
H5N5L3F3 + H9N8 + H6N6E1F4 + H7N6E1F3 + H6N6E2F2 + H8N9 + H7N7F4 + H8N7F3 + H6N5L2E2 + H8N7E1F1 + H7N6L2F2 + H7N8F3 + H8N8F2 + H6N6L1E1F3 + H9N8F1 + H6N5E3F2 + H7N6E1F4 + H7N6L1E2 + H9N9 + H8N7F4 + H7N6E3 + H6N5L2E2F1 + H8N7E1F2 + H7N8F4 + H8N7E2 +
H8N8F3 + H7N6L2E1F1 + H9N8F2 + H6N5E3F3 + H9N8E1 + H7N6L1E2F1 + H9N9F1 + H10N9 + H7N6E3F1 + H7N6L3F2 + H8N7E1F3 + H7N6L3E1 + H8N8F4 + H9N8F3 + H7N6L2E2 + H9N8E1F1 + H9N9F2 + H7N6L1E3 + H7N6L4F1 + H10N9F1 + H6N5L2E3F1 + H10N10 + H9N8F4 + H8N7E3 +
H7N6L2E2F1 + H9N8E2 + H9N9F3 + H10N9F2 + H10N9E1 + H10N10F1 + H9N8F5 + H8N7L3E1 + H10N9F3 + H8N7L2E2 + H10N10F2 + H9N8L2E1)).
EXECUTE.
COMPUTE CA2 = (1 * (H3N4F1 + H3N4F2 + H4N4F1 + H5N4 + H4N4F2 + H5N4F1 + H4N4E1 + H5N4L1 + H5N4F2 + H4N4E1F1 + H5N4E1 + H5N4L1F1 + H5N4E1F1 + H5N4L2 + H5N4L1F2 + H5N4F4 + H5N4L1E1 + H5N4E1F2 + H5N4E2 + H5N4L2F1 + H5N4L1F3 + H5N4L1E1F1 + H5N4E1F3 +
H5N4E2F1 + H5N4L1E2F1)) / (1 * (H3N4F1 + H3N5 + H3N4F2 + H4N4F1 + H5N4 + H3N5F1 + H4N5 + H4N4F2 + H5N4F1 + H4N4E1 + H3N5F2 + H4N5F1 + H5N5 + H3N6F1 + H5N4L1 + H5N4F2 + H4N4E1F1 + H5N4E1 + H4N5F2 + H5N5F1 + H4N5E1 + H6N5 + H3N6F2 + H4N6F1 + H5N4L1F1 +
H4N5L1F1 + H5N4E1F1 + H4N5F3 + H5N5F2 + H4N5E1F1 + H6N5F1 + H3N6F3 + H5N5E1 + H4N6F2 + H5N4L2 + H5N6F1 + H5N4L1F2 + H5N4F4 + H5N4L1E1 + H5N4E1F2 + H5N4E2 + H5N5F3 + H6N5F2 + H5N5E1F1 + H6N5E1 + H5N4L2F1 + H5N6F2 + H4N6E1F1 + H5N4L1F3 + H6N6F1 + H7N6 +
H5N4L1E1F1 + H5N4E1F3 + H5N4E2F1 + H5N5F4 + H5N5L1E1 + H6N5F3 + H5N5E1F2 + H6N5E1F1 + H5N5E2 + H5N6F3 + H6N6F2 + H5N6E1F1 + H7N6F1 + H6N6E1 + H5N7F2 + H6N5L2 + H5N5L1F3 + H6N7F1 + H6N5L1F2 + H7N7 + H6N5F4 + H6N5L1E1 + H5N5E1F3 + H6N5E1F2 + H6N6L1F1 +
H5N6F4 + H6N5E2 + H6N6F3 + H7N6F2 + H6N6E1F1 + H5N5L2F2 + H5N7F3 + H7N6E1 + H5N4L1E2F1 + H6N7F2 + H6N5L1F3 + H7N7F1 + H5N5L1E1F2 + H8N7 + H6N5L1E1F1 + H6N5E1F3 + H5N5E2F2 + H7N6L1F1 + H6N6F4 + H7N6F3 + H6N6E1F2 + H6N5L3 + H7N6E1F1 + H6N6E2 + H6N7F3 +
H6N5L1F4 + H7N7F2 + H6N5L2E1 + H8N7F1 + H6N5E1F4 + H6N5L1E2 + H7N8F1 + H7N6L1F2 + H8N8 + H7N6F4 + H7N6L1E1 + H6N6E1F3 + H6N5L3F1 + H7N6E1F2 + H6N7F4 + H7N6E2 + H7N7F3 + H6N5L2E1F1 + H8N7F2 + H6N5L1E1F3 + H8N7E1 + H6N5L1E2F1 + H7N8F2 + H8N8F1 +
H5N5L3F3 + H9N8 + H6N6E1F4 + H7N6E1F3 + H6N6E2F2 + H8N9 + H7N7F4 + H8N7F3 + H6N5L2E2 + H8N7E1F1 + H7N6L2F2 + H7N8F3 + H8N8F2 + H6N6L1E1F3 + H9N8F1 + H6N5E3F2 + H7N6E1F4 + H7N6L1E2 + H9N9 + H8N7F4 + H7N6E3 + H6N5L2E2F1 + H8N7E1F2 + H7N8F4 + H8N7E2 +
H8N8F3 + H7N6L2E1F1 + H9N8F2 + H6N5E3F3 + H9N8E1 + H7N6L1E2F1 + H9N9F1 + H10N9 + H7N6E3F1 + H7N6L3F2 + H8N7E1F3 + H7N6L3E1 + H8N8F4 + H9N8F3 + H7N6L2E2 + H9N8E1F1 + H9N9F2 + H7N6L1E3 + H7N6L4F1 + H10N9F1 + H6N5L2E3F1 + H10N10 + H9N8F4 + H8N7E3 +
H7N6L2E2F1 + H9N8E2 + H9N9F3 + H10N9F2 + H10N9E1 + H10N10F1 + H9N8F5 + H8N7L3E1 + H10N9F3 + H8N7L2E2 + H10N10F2 + H9N8L2E1)).
EXECUTE.
COMPUTE CA3 = (1 * (H3N5 + H3N5F1 + H4N5 + H3N5F2 + H4N5F1 + H5N5 + H4N5F2 + H5N5F1 + H4N5E1 + H6N5 + H4N5L1F1 + H4N5F3 + H5N5F2 + H4N5E1F1 + H6N5F1 + H5N5E1 + H5N5F3 + H6N5F2 + H5N5E1F1 + H6N5E1 + H5N5F4 + H5N5L1E1 + H6N5F3 + H5N5E1F2 + H6N5E1F1 +
H5N5E2 + H6N5L2 + H5N5L1F3 + H6N5L1F2 + H6N5F4 + H6N5L1E1 + H5N5E1F3 + H6N5E1F2 + H6N5E2 + H5N5L2F2 + H6N5L1F3 + H5N5L1E1F2 + H6N5L1E1F1 + H6N5E1F3 + H5N5E2F2 + H6N5L3 + H6N5L1F4 + H6N5L2E1 + H6N5E1F4 + H6N5L1E2 + H6N5L3F1 + H6N5L2E1F1 + H6N5L1E1F3 +
H6N5L1E2F1 + H5N5L3F3 + H6N5L2E2 + H6N5E3F2 + H6N5L2E2F1 + H6N5E3F3 + H6N5L2E3F1)) / (1 * (H3N4F1 + H3N5 + H3N4F2 + H4N4F1 + H5N4 + H3N5F1 + H4N5 + H4N4F2 + H5N4F1 + H4N4E1 + H3N5F2 + H4N5F1 + H5N5 + H3N6F1 + H5N4L1 + H5N4F2 + H4N4E1F1 + H5N4E1 +
H4N5F2 + H5N5F1 + H4N5E1 + H6N5 + H3N6F2 + H4N6F1 + H5N4L1F1 + H4N5L1F1 + H5N4E1F1 + H4N5F3 + H5N5F2 + H4N5E1F1 + H6N5F1 + H3N6F3 + H5N5E1 + H4N6F2 + H5N4L2 + H5N6F1 + H5N4L1F2 + H5N4F4 + H5N4L1E1 + H5N4E1F2 + H5N4E2 + H5N5F3 + H6N5F2 + H5N5E1F1 +
H6N5E1 + H5N4L2F1 + H5N6F2 + H4N6E1F1 + H5N4L1F3 + H6N6F1 + H7N6 + H5N4L1E1F1 + H5N4E1F3 + H5N4E2F1 + H5N5F4 + H5N5L1E1 + H6N5F3 + H5N5E1F2 + H6N5E1F1 + H5N5E2 + H5N6F3 + H6N6F2 + H5N6E1F1 + H7N6F1 + H6N6E1 + H5N7F2 + H6N5L2 + H5N5L1F3 + H6N7F1 +
H6N5L1F2 + H7N7 + H6N5F4 + H6N5L1E1 + H5N5E1F3 + H6N5E1F2 + H6N6L1F1 + H5N6F4 + H6N5E2 + H6N6F3 + H7N6F2 + H6N6E1F1 + H5N5L2F2 + H5N7F3 + H7N6E1 + H5N4L1E2F1 + H6N7F2 + H6N5L1F3 + H7N7F1 + H5N5L1E1F2 + H8N7 + H6N5L1E1F1 + H6N5E1F3 + H5N5E2F2 +
H7N6L1F1 + H6N6F4 + H7N6F3 + H6N6E1F2 + H6N5L3 + H7N6E1F1 + H6N6E2 + H6N7F3 + H6N5L1F4 + H7N7F2 + H6N5L2E1 + H8N7F1 + H6N5E1F4 + H6N5L1E2 + H7N8F1 + H7N6L1F2 + H8N8 + H7N6F4 + H7N6L1E1 + H6N6E1F3 + H6N5L3F1 + H7N6E1F2 + H6N7F4 + H7N6E2 + H7N7F3 +
H6N5L2E1F1 + H8N7F2 + H6N5L1E1F3 + H8N7E1 + H6N5L1E2F1 + H7N8F2 + H8N8F1 + H5N5L3F3 + H9N8 + H6N6E1F4 + H7N6E1F3 + H6N6E2F2 + H8N9 + H7N7F4 + H8N7F3 + H6N5L2E2 + H8N7E1F1 + H7N6L2F2 + H7N8F3 + H8N8F2 + H6N6L1E1F3 + H9N8F1 + H6N5E3F2 + H7N6E1F4 +
H7N6L1E2 + H9N9 + H8N7F4 + H7N6E3 + H6N5L2E2F1 + H8N7E1F2 + H7N8F4 + H8N7E2 + H8N8F3 + H7N6L2E1F1 + H9N8F2 + H6N5E3F3 + H9N8E1 + H7N6L1E2F1 + H9N9F1 + H10N9 + H7N6E3F1 + H7N6L3F2 + H8N7E1F3 + H7N6L3E1 + H8N8F4 + H9N8F3 + H7N6L2E2 + H9N8E1F1 + H9N9F2 +
H7N6L1E3 + H7N6L4F1 + H10N9F1 + H6N5L2E3F1 + H10N10 + H9N8F4 + H8N7E3 + H7N6L2E2F1 + H9N8E2 + H9N9F3 + H10N9F2 + H10N9E1 + H10N10F1 + H9N8F5 + H8N7L3E1 + H10N9F3 + H8N7L2E2 + H10N10F2 + H9N8L2E1)).
EXECUTE.
COMPUTE CA4 = (1 * (H3N6F1 + H3N6F2 + H4N6F1 + H3N6F3 + H4N6F2 + H5N6F1 + H5N6F2 + H4N6E1F1 + H6N6F1 + H7N6 + H5N6F3 + H6N6F2 + H5N6E1F1 + H7N6F1 + H6N6E1 + H6N6L1F1 + H5N6F4 + H6N6F3 + H7N6F2 + H6N6E1F1 + H7N6E1 + H7N6L1F1 + H6N6F4 + H7N6F3 +
H6N6E1F2 + H7N6E1F1 + H6N6E2 + H7N6L1F2 + H7N6F4 + H7N6L1E1 + H6N6E1F3 + H7N6E1F2 + H7N6E2 + H6N6E1F4 + H7N6E1F3 + H6N6E2F2 + H7N6L2F2 + H6N6L1E1F3 + H7N6E1F4 + H7N6L1E2 + H7N6E3 + H7N6L2E1F1 + H7N6L1E2F1 + H7N6E3F1 + H7N6L3F2 + H7N6L3E1 + H7N6L2E2 +
H7N6L1E3 + H7N6L4F1 + H7N6L2E2F1)) / (1 * (H3N4F1 + H3N5 + H3N4F2 + H4N4F1 + H5N4 + H3N5F1 + H4N5 + H4N4F2 + H5N4F1 + H4N4E1 + H3N5F2 + H4N5F1 + H5N5 + H3N6F1 + H5N4L1 + H5N4F2 + H4N4E1F1 + H5N4E1 + H4N5F2 + H5N5F1 + H4N5E1 + H6N5 + H3N6F2 + H4N6F1 +
H5N4L1F1 + H4N5L1F1 + H5N4E1F1 + H4N5F3 + H5N5F2 + H4N5E1F1 + H6N5F1 + H3N6F3 + H5N5E1 + H4N6F2 + H5N4L2 + H5N6F1 + H5N4L1F2 + H5N4F4 + H5N4L1E1 + H5N4E1F2 + H5N4E2 + H5N5F3 + H6N5F2 + H5N5E1F1 + H6N5E1 + H5N4L2F1 + H5N6F2 + H4N6E1F1 + H5N4L1F3 +
H6N6F1 + H7N6 + H5N4L1E1F1 + H5N4E1F3 + H5N4E2F1 + H5N5F4 + H5N5L1E1 + H6N5F3 + H5N5E1F2 + H6N5E1F1 + H5N5E2 + H5N6F3 + H6N6F2 + H5N6E1F1 + H7N6F1 + H6N6E1 + H5N7F2 + H6N5L2 + H5N5L1F3 + H6N7F1 + H6N5L1F2 + H7N7 + H6N5F4 + H6N5L1E1 + H5N5E1F3 +
H6N5E1F2 + H6N6L1F1 + H5N6F4 + H6N5E2 + H6N6F3 + H7N6F2 + H6N6E1F1 + H5N5L2F2 + H5N7F3 + H7N6E1 + H5N4L1E2F1 + H6N7F2 + H6N5L1F3 + H7N7F1 + H5N5L1E1F2 + H8N7 + H6N5L1E1F1 + H6N5E1F3 + H5N5E2F2 + H7N6L1F1 + H6N6F4 + H7N6F3 + H6N6E1F2 + H6N5L3 +
H7N6E1F1 + H6N6E2 + H6N7F3 + H6N5L1F4 + H7N7F2 + H6N5L2E1 + H8N7F1 + H6N5E1F4 + H6N5L1E2 + H7N8F1 + H7N6L1F2 + H8N8 + H7N6F4 + H7N6L1E1 + H6N6E1F3 + H6N5L3F1 + H7N6E1F2 + H6N7F4 + H7N6E2 + H7N7F3 + H6N5L2E1F1 + H8N7F2 + H6N5L1E1F3 + H8N7E1 +
H6N5L1E2F1 + H7N8F2 + H8N8F1 + H5N5L3F3 + H9N8 + H6N6E1F4 + H7N6E1F3 + H6N6E2F2 + H8N9 + H7N7F4 + H8N7F3 + H6N5L2E2 + H8N7E1F1 + H7N6L2F2 + H7N8F3 + H8N8F2 + H6N6L1E1F3 + H9N8F1 + H6N5E3F2 + H7N6E1F4 + H7N6L1E2 + H9N9 + H8N7F4 + H7N6E3 + H6N5L2E2F1 +
H8N7E1F2 + H7N8F4 + H8N7E2 + H8N8F3 + H7N6L2E1F1 + H9N8F2 + H6N5E3F3 + H9N8E1 + H7N6L1E2F1 + H9N9F1 + H10N9 + H7N6E3F1 + H7N6L3F2 + H8N7E1F3 + H7N6L3E1 + H8N8F4 + H9N8F3 + H7N6L2E2 + H9N8E1F1 + H9N9F2 + H7N6L1E3 + H7N6L4F1 + H10N9F1 + H6N5L2E3F1 +
H10N10 + H9N8F4 + H8N7E3 + H7N6L2E2F1 + H9N8E2 + H9N9F3 + H10N9F2 + H10N9E1 + H10N10F1 + H9N8F5 + H8N7L3E1 + H10N9F3 + H8N7L2E2 + H10N10F2 + H9N8L2E1)).
EXECUTE.
COMPUTE CALN = (1 * (H8N7 + H8N7F1 + H8N7F2 + H8N7E1 + H9N8 + H8N7F3 + H8N7E1F1 + H9N8F1 + H8N7F4 + H8N7E1F2 + H8N7E2 + H9N8F2 + H9N8E1 + H10N9 + H8N7E1F3 + H9N8F3 + H9N8E1F1 + H10N9F1 + H9N8F4 + H8N7E3 + H9N8E2 + H10N9F2 + H10N9E1 + H9N8F5 + H8N7L3E1
+ H10N9F3 + H8N7L2E2 + H9N8L2E1)) / (1 * (H3N4F1 + H3N5 + H3N4F2 + H4N4F1 + H5N4 + H3N5F1 + H4N5 + H4N4F2 + H5N4F1 + H4N4E1 + H3N5F2 + H4N5F1 + H5N5 + H3N6F1 + H5N4L1 + H5N4F2 + H4N4E1F1 + H5N4E1 + H4N5F2 + H5N5F1 + H4N5E1 + H6N5 + H3N6F2 + H4N6F1 +
H5N4L1F1 + H4N5L1F1 + H5N4E1F1 + H4N5F3 + H5N5F2 + H4N5E1F1 + H6N5F1 + H3N6F3 + H5N5E1 + H4N6F2 + H5N4L2 + H5N6F1 + H5N4L1F2 + H5N4F4 + H5N4L1E1 + H5N4E1F2 + H5N4E2 + H5N5F3 + H6N5F2 + H5N5E1F1 + H6N5E1 + H5N4L2F1 + H5N6F2 + H4N6E1F1 + H5N4L1F3 +
H6N6F1 + H7N6 + H5N4L1E1F1 + H5N4E1F3 + H5N4E2F1 + H5N5F4 + H5N5L1E1 + H6N5F3 + H5N5E1F2 + H6N5E1F1 + H5N5E2 + H5N6F3 + H6N6F2 + H5N6E1F1 + H7N6F1 + H6N6E1 + H5N7F2 + H6N5L2 + H5N5L1F3 + H6N7F1 + H6N5L1F2 + H7N7 + H6N5F4 + H6N5L1E1 + H5N5E1F3 +
H6N5E1F2 + H6N6L1F1 + H5N6F4 + H6N5E2 + H6N6F3 + H7N6F2 + H6N6E1F1 + H5N5L2F2 + H5N7F3 + H7N6E1 + H5N4L1E2F1 + H6N7F2 + H6N5L1F3 + H7N7F1 + H5N5L1E1F2 + H8N7 + H6N5L1E1F1 + H6N5E1F3 + H5N5E2F2 + H7N6L1F1 + H6N6F4 + H7N6F3 + H6N6E1F2 + H6N5L3 +
H7N6E1F1 + H6N6E2 + H6N7F3 + H6N5L1F4 + H7N7F2 + H6N5L2E1 + H8N7F1 + H6N5E1F4 + H6N5L1E2 + H7N8F1 + H7N6L1F2 + H8N8 + H7N6F4 + H7N6L1E1 + H6N6E1F3 + H6N5L3F1 + H7N6E1F2 + H6N7F4 + H7N6E2 + H7N7F3 + H6N5L2E1F1 + H8N7F2 + H6N5L1E1F3 + H8N7E1 +
H6N5L1E2F1 + H7N8F2 + H8N8F1 + H5N5L3F3 + H9N8 + H6N6E1F4 + H7N6E1F3 + H6N6E2F2 + H8N9 + H7N7F4 + H8N7F3 + H6N5L2E2 + H8N7E1F1 + H7N6L2F2 + H7N8F3 + H8N8F2 + H6N6L1E1F3 + H9N8F1 + H6N5E3F2 + H7N6E1F4 + H7N6L1E2 + H9N9 + H8N7F4 + H7N6E3 + H6N5L2E2F1 +
H8N7E1F2 + H7N8F4 + H8N7E2 + H8N8F3 + H7N6L2E1F1 + H9N8F2 + H6N5E3F3 + H9N8E1 + H7N6L1E2F1 + H9N9F1 + H10N9 + H7N6E3F1 + H7N6L3F2 + H8N7E1F3 + H7N6L3E1 + H8N8F4 + H9N8F3 + H7N6L2E2 + H9N8E1F1 + H9N9F2 + H7N6L1E3 + H7N6L4F1 + H10N9F1 + H6N5L2E3F1 +
H10N10 + H9N8F4 + H8N7E3 + H7N6L2E2F1 + H9N8E2 + H9N9F3 + H10N9F2 + H10N9E1 + H10N10F1 + H9N8F5 + H8N7L3E1 + H10N9F3 + H8N7L2E2 + H10N10F2 + H9N8L2E1)).
EXECUTE.
COMPUTE CF = (1 * (H3N4F1 + H3N4F2 + H4N4F1 + H3N5F1 + H4N4F2 + H5N4F1 + H3N5F2 + H4N5F1 + H3N6F1 + H5N4F2 + H4N4E1F1 + H4N5F2 + H5N5F1 + H3N6F2 + H4N6F1 + H5N4L1F1 + H4N5L1F1 + H5N4E1F1 + H4N5F3 + H5N5F2 + H4N5E1F1 + H6N5F1 + H3N6F3 + H4N6F2 + H5N6F1
+ H5N4L1F2 + H5N4F4 + H5N4E1F2 + H5N5F3 + H6N5F2 + H5N5E1F1 + H5N4L2F1 + H5N6F2 + H4N6E1F1 + H5N4L1F3 + H6N6F1 + H5N4L1E1F1 + H5N4E1F3 + H5N4E2F1 + H5N5F4 + H6N5F3 + H5N5E1F2 + H6N5E1F1 + H5N6F3 + H6N6F2 + H5N6E1F1 + H7N6F1 + H5N7F2 + H5N5L1F3 +
H6N7F1 + H6N5L1F2 + H6N5F4 + H5N5E1F3 + H6N5E1F2 + H6N6L1F1 + H5N6F4 + H6N6F3 + H7N6F2 + H6N6E1F1 + H5N5L2F2 + H5N7F3 + H5N4L1E2F1 + H6N7F2 + H6N5L1F3 + H7N7F1 + H5N5L1E1F2 + H6N5L1E1F1 + H6N5E1F3 + H5N5E2F2 + H7N6L1F1 + H6N6F4 + H7N6F3 + H6N6E1F2 +
H7N6E1F1 + H6N7F3 + H6N5L1F4 + H7N7F2 + H8N7F1 + H6N5E1F4 + H7N8F1 + H7N6L1F2 + H7N6F4 + H6N6E1F3 + H6N5L3F1 + H7N6E1F2 + H6N7F4 + H7N7F3 + H6N5L2E1F1 + H8N7F2 + H6N5L1E1F3 + H6N5L1E2F1 + H7N8F2 + H8N8F1 + H5N5L3F3 + H6N6E1F4 + H7N6E1F3 + H6N6E2F2 +
H7N7F4 + H8N7F3 + H8N7E1F1 + H7N6L2F2 + H7N8F3 + H8N8F2 + H6N6L1E1F3 + H9N8F1 + H6N5E3F2 + H7N6E1F4 + H8N7F4 + H6N5L2E2F1 + H8N7E1F2 + H7N8F4 + H8N8F3 + H7N6L2E1F1 + H9N8F2 + H6N5E3F3 + H7N6L1E2F1 + H9N9F1 + H7N6E3F1 + H7N6L3F2 + H8N7E1F3 + H8N8F4 +
H9N8F3 + H9N8E1F1 + H9N9F2 + H7N6L4F1 + H10N9F1 + H6N5L2E3F1 + H9N8F4 + H7N6L2E2F1 + H9N9F3 + H10N9F2 + H10N10F1 + H9N8F5 + H10N9F3 + H10N10F2)) / (1 * (H3N4F1 + H3N5 + H3N4F2 + H4N4F1 + H5N4 + H3N5F1 + H4N5 + H4N4F2 + H5N4F1 + H4N4E1 + H3N5F2 +
H4N5F1 + H5N5 + H3N6F1 + H5N4L1 + H5N4F2 + H4N4E1F1 + H5N4E1 + H4N5F2 + H5N5F1 + H4N5E1 + H6N5 + H3N6F2 + H4N6F1 + H5N4L1F1 + H4N5L1F1 + H5N4E1F1 + H4N5F3 + H5N5F2 + H4N5E1F1 + H6N5F1 + H3N6F3 + H5N5E1 + H4N6F2 + H5N4L2 + H5N6F1 + H5N4L1F2 + H5N4F4 +
H5N4L1E1 + H5N4E1F2 + H5N4E2 + H5N5F3 + H6N5F2 + H5N5E1F1 + H6N5E1 + H5N4L2F1 + H5N6F2 + H4N6E1F1 + H5N4L1F3 + H6N6F1 + H7N6 + H5N4L1E1F1 + H5N4E1F3 + H5N4E2F1 + H5N5F4 + H5N5L1E1 + H6N5F3 + H5N5E1F2 + H6N5E1F1 + H5N5E2 + H5N6F3 + H6N6F2 + H5N6E1F1 +
H7N6F1 + H6N6E1 + H5N7F2 + H6N5L2 + H5N5L1F3 + H6N7F1 + H6N5L1F2 + H7N7 + H6N5F4 + H6N5L1E1 + H5N5E1F3 + H6N5E1F2 + H6N6L1F1 + H5N6F4 + H6N5E2 + H6N6F3 + H7N6F2 + H6N6E1F1 + H5N5L2F2 + H5N7F3 + H7N6E1 + H5N4L1E2F1 + H6N7F2 + H6N5L1F3 + H7N7F1 +
H5N5L1E1F2 + H8N7 + H6N5L1E1F1 + H6N5E1F3 + H5N5E2F2 + H7N6L1F1 + H6N6F4 + H7N6F3 + H6N6E1F2 + H6N5L3 + H7N6E1F1 + H6N6E2 + H6N7F3 + H6N5L1F4 + H7N7F2 + H6N5L2E1 + H8N7F1 + H6N5E1F4 + H6N5L1E2 + H7N8F1 + H7N6L1F2 + H8N8 + H7N6F4 + H7N6L1E1 + H6N6E1F3
+ H6N5L3F1 + H7N6E1F2 + H6N7F4 + H7N6E2 + H7N7F3 + H6N5L2E1F1 + H8N7F2 + H6N5L1E1F3 + H8N7E1 + H6N5L1E2F1 + H7N8F2 + H8N8F1 + H5N5L3F3 + H9N8 + H6N6E1F4 + H7N6E1F3 + H6N6E2F2 + H8N9 + H7N7F4 + H8N7F3 + H6N5L2E2 + H8N7E1F1 + H7N6L2F2 + H7N8F3 + H8N8F2
+ H6N6L1E1F3 + H9N8F1 + H6N5E3F2 + H7N6E1F4 + H7N6L1E2 + H9N9 + H8N7F4 + H7N6E3 + H6N5L2E2F1 + H8N7E1F2 + H7N8F4 + H8N7E2 + H8N8F3 + H7N6L2E1F1 + H9N8F2 + H6N5E3F3 + H9N8E1 + H7N6L1E2F1 + H9N9F1 + H10N9 + H7N6E3F1 + H7N6L3F2 + H8N7E1F3 + H7N6L3E1 +
H8N8F4 + H9N8F3 + H7N6L2E2 + H9N8E1F1 + H9N9F2 + H7N6L1E3 + H7N6L4F1 + H10N9F1 + H6N5L2E3F1 + H10N10 + H9N8F4 + H8N7E3 + H7N6L2E2F1 + H9N8E2 + H9N9F3 + H10N9F2 + H10N9E1 + H10N10F1 + H9N8F5 + H8N7L3E1 + H10N9F3 + H8N7L2E2 + H10N10F2 + H9N8L2E1)).
EXECUTE.
COMPUTE CFa = (1 * (H3N4F2 + H4N4F2 + H3N5F2 + H5N4F2 + H4N5F2 + H3N6F2 + H4N5F3 + H5N5F2 + H3N6F3 + H4N6F2 + H5N4L1F2 + H5N4F4 + H5N4E1F2 + H5N5F3 + H6N5F2 + H5N6F2 + H5N4L1F3 + H5N4E1F3 + H5N5F4 + H6N5F3 + H5N5E1F2 + H5N6F3 + H6N6F2 + H5N7F2 +
H5N5L1F3 + H6N5L1F2 + H6N5F4 + H5N5E1F3 + H6N5E1F2 + H5N6F4 + H6N6F3 + H7N6F2 + H5N5L2F2 + H5N7F3 + H6N7F2 + H6N5L1F3 + H5N5L1E1F2 + H6N5E1F3 + H5N5E2F2 + H6N6F4 + H7N6F3 + H6N6E1F2 + H6N7F3 + H6N5L1F4 + H7N7F2 + H6N5E1F4 + H7N6L1F2 + H7N6F4 +
H6N6E1F3 + H7N6E1F2 + H6N7F4 + H7N7F3 + H8N7F2 + H6N5L1E1F3 + H7N8F2 + H5N5L3F3 + H6N6E1F4 + H7N6E1F3 + H6N6E2F2 + H7N7F4 + H8N7F3 + H7N6L2F2 + H7N8F3 + H8N8F2 + H6N6L1E1F3 + H6N5E3F2 + H7N6E1F4 + H8N7F4 + H8N7E1F2 + H7N8F4 + H8N8F3 + H9N8F2 +
H6N5E3F3 + H7N6L3F2 + H8N7E1F3 + H8N8F4 + H9N8F3 + H9N9F2 + H9N8F4 + H9N9F3 + H10N9F2 + H9N8F5 + H10N9F3 + H10N10F2)) / (1 * (H3N4F1 + H3N5 + H3N4F2 + H4N4F1 + H5N4 + H3N5F1 + H4N5 + H4N4F2 + H5N4F1 + H4N4E1 + H3N5F2 + H4N5F1 + H5N5 + H3N6F1 + H5N4L1
+ H5N4F2 + H4N4E1F1 + H5N4E1 + H4N5F2 + H5N5F1 + H4N5E1 + H6N5 + H3N6F2 + H4N6F1 + H5N4L1F1 + H4N5L1F1 + H5N4E1F1 + H4N5F3 + H5N5F2 + H4N5E1F1 + H6N5F1 + H3N6F3 + H5N5E1 + H4N6F2 + H5N4L2 + H5N6F1 + H5N4L1F2 + H5N4F4 + H5N4L1E1 + H5N4E1F2 + H5N4E2 +
H5N5F3 + H6N5F2 + H5N5E1F1 + H6N5E1 + H5N4L2F1 + H5N6F2 + H4N6E1F1 + H5N4L1F3 + H6N6F1 + H7N6 + H5N4L1E1F1 + H5N4E1F3 + H5N4E2F1 + H5N5F4 + H5N5L1E1 + H6N5F3 + H5N5E1F2 + H6N5E1F1 + H5N5E2 + H5N6F3 + H6N6F2 + H5N6E1F1 + H7N6F1 + H6N6E1 + H5N7F2 +
H6N5L2 + H5N5L1F3 + H6N7F1 + H6N5L1F2 + H7N7 + H6N5F4 + H6N5L1E1 + H5N5E1F3 + H6N5E1F2 + H6N6L1F1 + H5N6F4 + H6N5E2 + H6N6F3 + H7N6F2 + H6N6E1F1 + H5N5L2F2 + H5N7F3 + H7N6E1 + H5N4L1E2F1 + H6N7F2 + H6N5L1F3 + H7N7F1 + H5N5L1E1F2 + H8N7 + H6N5L1E1F1 +
H6N5E1F3 + H5N5E2F2 + H7N6L1F1 + H6N6F4 + H7N6F3 + H6N6E1F2 + H6N5L3 + H7N6E1F1 + H6N6E2 + H6N7F3 + H6N5L1F4 + H7N7F2 + H6N5L2E1 + H8N7F1 + H6N5E1F4 + H6N5L1E2 + H7N8F1 + H7N6L1F2 + H8N8 + H7N6F4 + H7N6L1E1 + H6N6E1F3 + H6N5L3F1 + H7N6E1F2 + H6N7F4 +
H7N6E2 + H7N7F3 + H6N5L2E1F1 + H8N7F2 + H6N5L1E1F3 + H8N7E1 + H6N5L1E2F1 + H7N8F2 + H8N8F1 + H5N5L3F3 + H9N8 + H6N6E1F4 + H7N6E1F3 + H6N6E2F2 + H8N9 + H7N7F4 + H8N7F3 + H6N5L2E2 + H8N7E1F1 + H7N6L2F2 + H7N8F3 + H8N8F2 + H6N6L1E1F3 + H9N8F1 + H6N5E3F2
+ H7N6E1F4 + H7N6L1E2 + H9N9 + H8N7F4 + H7N6E3 + H6N5L2E2F1 + H8N7E1F2 + H7N8F4 + H8N7E2 + H8N8F3 + H7N6L2E1F1 + H9N8F2 + H6N5E3F3 + H9N8E1 + H7N6L1E2F1 + H9N9F1 + H10N9 + H7N6E3F1 + H7N6L3F2 + H8N7E1F3 + H7N6L3E1 + H8N8F4 + H9N8F3 + H7N6L2E2 +
H9N8E1F1 + H9N9F2 + H7N6L1E3 + H7N6L4F1 + H10N9F1 + H6N5L2E3F1 + H10N10 + H9N8F4 + H8N7E3 + H7N6L2E2F1 + H9N8E2 + H9N9F3 + H10N9F2 + H10N9E1 + H10N10F1 + H9N8F5 + H8N7L3E1 + H10N9F3 + H8N7L2E2 + H10N10F2 + H9N8L2E1)).
EXECUTE.
COMPUTE CS = (1 * (H4N4E1 + H5N4L1 + H4N4E1F1 + H5N4E1 +H4N5E1 + H5N4L1F1 + H4N5L1F1 + H5N4E1F1 + H4N5E1F1 +H5N5E1 +H5N4L2 + H5N4L1F2 + H5N4L1E1 + H5N4E1F2 + H5N4E2 + H5N5E1F1 + H6N5E1 + H5N4L2F1 + H4N6E1F1 + H5N4L1F3 + H5N4L1E1F1
+ H5N4E1F3 + H5N4E2F1 + H5N5L1E1 + H5N5E1F2 + H6N5E1F1 + H5N5E2 + H5N6E1F1 +H6N6E1 + H6N5L2 + H5N5L1F3 + H6N5L1F2 + H6N5L1E1 + H5N5E1F3 + H6N5E1F2 + H6N6L1F1 + H6N5E2 + H6N6E1F1 + H5N5L2F2 + H7N6E1 + H5N4L1E2F1 + H6N5L1F3 + H5N5L1E1F2 +
H6N5L1E1F1 + H6N5E1F3 + H5N5E2F2 + H7N6L1F1 + H6N6E1F2 + H6N5L3 + H7N6E1F1 + H6N6E2 + H6N5L1F4 + H6N5L2E1 + H6N5E1F4 + H6N5L1E2 +H7N6L1F2 +H7N6L1E1 + H6N6E1F3 + H6N5L3F1 + H7N6E1F2 + H7N6E2 + H6N5L2E1F1 +H6N5L1E1F3 + H8N7E1 + H6N5L1E2F1 + H5N5L3F3 +
+ H6N6E1F4 + H7N6E1F3 + H6N6E2F2 + H6N5L2E2 + H8N7E1F1 + H7N6L2F2 + H6N6L1E1F3 + H6N5E3F2 + H7N6E1F4 + H7N6L1E2 + H7N6E3 + H6N5L2E2F1 + H8N7E1F2 + H8N7E2 + H7N6L2E1F1 +H6N5E3F3 + H9N8E1 + H7N6L1E2F1 + H7N6E3F1 + H7N6L3F2 + H8N7E1F3 + H7N6L3E1 +
H7N6L2E2 + H9N8E1F1 + H7N6L1E3 + H7N6L4F1 + H6N5L2E3F1 + H8N7E3 + H7N6L2E2F1 + H9N8E2 + H10N9E1 + H8N7L3E1 + H8N7L2E2 + H9N8L2E1)) /
(1 * (H5N2 + H6N2 + H4N3F1 + H5N3 + H3N4F1 + H3N5 + H7N2 + H4N3F2 + H5N3F1 + H4N3E1 + H6N3 + H3N4F2 + H4N4F1 + H5N4 + H3N5F1 + H4N5 +
H8N2 + H5N3F2 + H4N3E1F1 + H6N3F1 + H5N3E1 + H4N4F2 + H5N4F1 + H4N4E1 + H6N4 + H3N5F2 + H4N5F1 + H4N3L1F2 + H5N5 + H5N3L1F1 + H3N6F1 + H9N2 + H6N3F2 + H7N3F1 + H5N4L1 + H6N3E1 + H5N4F2 + H4N4E1F1 + H6N4F1 + H5N4E1 + H4N5F2 + H5N5F1 + H4N5E1 + H6N5 +
H3N6F2 + H6N3L1F1 + H4N6F1 + H10N2 + H5N4L1F1 + H6N3E1F1 + H6N4F2 + H4N5L1F1 + H5N4E1F1 + H4N5F3 + H5N5F2 + H4N5E1F1 + H6N5F1 + H3N6F3 + H5N5E1 + H4N6F2 + H5N4L2 + H5N6F1 + H5N4L1F2 + H5N4F4 + H5N4L1E1 + H5N4E1F2 + H6N4E1F1 + H5N4E2 + H5N5F3 + H6N5F2
+ H5N5E1F1 + H6N5E1 + H5N4L2F1 + H5N6F2 + H4N6E1F1 + H5N4L1F3 + H6N6F1 + H7N6 + H5N4L1E1F1 + H5N4E1F3 + H5N4E2F1 + H5N5F4 + H5N5L1E1 + H6N5F3 + H5N5E1F2 + H6N5E1F1 + H5N5E2 + H5N6F3 + H6N6F2 + H5N6E1F1 + H7N6F1 + H6N6E1 + H5N7F2 + H6N5L2 + H5N5L1F3 +
H6N7F1 + H6N5L1F2 + H7N7 + H6N5F4 + H6N5L1E1 + H5N5E1F3 + H6N5E1F2 + H6N6L1F1 + H5N6F4 + H9N5F1 + H6N5E2 + H6N6F3 + H7N6F2 + H6N6E1F1 + H5N5L2F2 + H5N7F3 + H7N6E1 + H5N4L1E2F1 + H6N7F2 + H6N5L1F3 + H7N7F1 + H5N5L1E1F2 + H8N7 + H6N5L1E1F1 + H6N5E1F3 +
H5N5E2F2 + H7N6L1F1 + H6N6F4 + H7N6F3 + H6N6E1F2 + H6N5L3 + H7N6E1F1 + H6N6E2 + H6N7F3 + H6N5L1F4 + H7N7F2 + H6N5L2E1 + H8N7F1 + H6N5E1F4 + H6N5L1E2 + H7N8F1 + H7N6L1F2 + H8N8 + H7N6F4 + H7N6L1E1 + H6N6E1F3 + H6N5L3F1 + H7N6E1F2 + H6N7F4 + H7N6E2 +
H7N7F3 + H6N5L2E1F1 + H8N7F2 + H6N5L1E1F3 + H8N7E1 + H6N5L1E2F1 + H7N8F2 + H8N8F1 + H5N5L3F3 + H9N8 + H6N6E1F4 + H7N6E1F3 + H6N6E2F2 + H8N9 + H7N7F4 + H8N7F3 + H6N5L2E2 + H8N7E1F1 + H7N6L2F2 + H7N8F3 + H8N8F2 + H6N6L1E1F3 + H9N8F1 + H6N5E3F2 +
H7N6E1F4 + H7N6L1E2 + H9N9 + H8N7F4 + H7N6E3 + H6N5L2E2F1 + H8N7E1F2 + H7N8F4 + H8N7E2 + H8N8F3 + H7N6L2E1F1 + H9N8F2 + H6N5E3F3 + H9N8E1 + H7N6L1E2F1 + H9N9F1 + H10N9 + H7N6E3F1 + H7N6L3F2 + H8N7E1F3 + H7N6L3E1 + H8N8F4 + H9N8F3 + H7N6L2E2 + H9N8E1F1
+ H9N9F2 + H7N6L1E3 + H7N6L4F1 + H10N9F1 + H6N5L2E3F1 + H10N10 + H9N8F4 + H8N7E3 + H7N6L2E2F1 + H9N8E2 + H9N9F3 + H10N9F2 + H10N9E1 + H10N10F1 + H9N8F5 + H8N7L3E1 + H10N9F3 + H8N7L2E2 + H10N10F2 + H9N8L2E1)).
EXECUTE.
COMPUTE CL = (1 * (H5N4L1 + H5N4L1F1 + H4N5L1F1 + H5N4L2 + H5N4L1F2 + H5N4L1E1 + H5N4L2F1 + H5N4L1F3 + H5N4L1E1F1 + H5N5L1E1 + H6N5L2 + H5N5L1F3 + H6N5L1F2 + H6N5L1E1 + H6N6L1F1 + H5N5L2F2 + H5N4L1E2F1 + H6N5L1F3 + H5N5L1E1F2 + H6N5L1E1F1 +
H7N6L1F1 + H6N5L3 + H6N5L1F4 + H6N5L2E1 + H6N5L1E2 +H7N6L1F2 +H7N6L1E1 + H6N5L3F1 + H6N5L2E1F1 +H6N5L1E1F3 + H6N5L1E2F1 + H5N5L3F3 + + H6N6E1F4 + H6N5L2E2 + H7N6L2F2 + H6N6L1E1F3 + H7N6L1E2 + H6N5L2E2F1 +
H7N6L2E1F1 + H7N6L1E2F1 + H7N6L3F2 + H7N6L3E1 + H7N6L2E2 + H7N6L1E3 + H7N6L4F1 + H6N5L2E3F1 + H7N6L2E2F1 + H8N7L3E1 + H8N7L2E2 + H9N8L2E1)) /
(1 * (H5N2 + H6N2 + H4N3F1 + H5N3 + H3N4F1 + H3N5 + H7N2 + H4N3F2 + H5N3F1 + H4N3E1 + H6N3 + H3N4F2 + H4N4F1 + H5N4 + H3N5F1 + H4N5 +
H8N2 + H5N3F2 + H4N3E1F1 + H6N3F1 + H5N3E1 + H4N4F2 + H5N4F1 + H4N4E1 + H6N4 + H3N5F2 + H4N5F1 + H4N3L1F2 + H5N5 + H5N3L1F1 + H3N6F1 + H9N2 + H6N3F2 + H7N3F1 + H5N4L1 + H6N3E1 + H5N4F2 + H4N4E1F1 + H6N4F1 + H5N4E1 + H4N5F2 + H5N5F1 + H4N5E1 + H6N5 +
H3N6F2 + H6N3L1F1 + H4N6F1 + H10N2 + H5N4L1F1 + H6N3E1F1 + H6N4F2 + H4N5L1F1 + H5N4E1F1 + H4N5F3 + H5N5F2 + H4N5E1F1 + H6N5F1 + H3N6F3 + H5N5E1 + H4N6F2 + H5N4L2 + H5N6F1 + H5N4L1F2 + H5N4F4 + H5N4L1E1 + H5N4E1F2 + H6N4E1F1 + H5N4E2 + H5N5F3 + H6N5F2
+ H5N5E1F1 + H6N5E1 + H5N4L2F1 + H5N6F2 + H4N6E1F1 + H5N4L1F3 + H6N6F1 + H7N6 + H5N4L1E1F1 + H5N4E1F3 + H5N4E2F1 + H5N5F4 + H5N5L1E1 + H6N5F3 + H5N5E1F2 + H6N5E1F1 + H5N5E2 + H5N6F3 + H6N6F2 + H5N6E1F1 + H7N6F1 + H6N6E1 + H5N7F2 + H6N5L2 + H5N5L1F3 +
H6N7F1 + H6N5L1F2 + H7N7 + H6N5F4 + H6N5L1E1 + H5N5E1F3 + H6N5E1F2 + H6N6L1F1 + H5N6F4 + H9N5F1 + H6N5E2 + H6N6F3 + H7N6F2 + H6N6E1F1 + H5N5L2F2 + H5N7F3 + H7N6E1 + H5N4L1E2F1 + H6N7F2 + H6N5L1F3 + H7N7F1 + H5N5L1E1F2 + H8N7 + H6N5L1E1F1 + H6N5E1F3 +
H5N5E2F2 + H7N6L1F1 + H6N6F4 + H7N6F3 + H6N6E1F2 + H6N5L3 + H7N6E1F1 + H6N6E2 + H6N7F3 + H6N5L1F4 + H7N7F2 + H6N5L2E1 + H8N7F1 + H6N5E1F4 + H6N5L1E2 + H7N8F1 + H7N6L1F2 + H8N8 + H7N6F4 + H7N6L1E1 + H6N6E1F3 + H6N5L3F1 + H7N6E1F2 + H6N7F4 + H7N6E2 +
H7N7F3 + H6N5L2E1F1 + H8N7F2 + H6N5L1E1F3 + H8N7E1 + H6N5L1E2F1 + H7N8F2 + H8N8F1 + H5N5L3F3 + H9N8 + H6N6E1F4 + H7N6E1F3 + H6N6E2F2 + H8N9 + H7N7F4 + H8N7F3 + H6N5L2E2 + H8N7E1F1 + H7N6L2F2 + H7N8F3 + H8N8F2 + H6N6L1E1F3 + H9N8F1 + H6N5E3F2 +
H7N6E1F4 + H7N6L1E2 + H9N9 + H8N7F4 + H7N6E3 + H6N5L2E2F1 + H8N7E1F2 + H7N8F4 + H8N7E2 + H8N8F3 + H7N6L2E1F1 + H9N8F2 + H6N5E3F3 + H9N8E1 + H7N6L1E2F1 + H9N9F1 + H10N9 + H7N6E3F1 + H7N6L3F2 + H8N7E1F3 + H7N6L3E1 + H8N8F4 + H9N8F3 + H7N6L2E2 + H9N8E1F1
+ H9N9F2 + H7N6L1E3 + H7N6L4F1 + H10N9F1 + H6N5L2E3F1 + H10N10 + H9N8F4 + H8N7E3 + H7N6L2E2F1 + H9N8E2 + H9N9F3 + H10N9F2 + H10N9E1 + H10N10F1 + H9N8F5 + H8N7L3E1 + H10N9F3 + H8N7L2E2 + H10N10F2 + H9N8L2E1)).
EXECUTE.
COMPUTE CE = (1 * (H4N4E1 + H4N4E1F1 + H5N4E1 +H4N5E1 + H5N4E1F1 + H4N5E1F1 +H5N5E1 + H5N4L1E1 + H5N4E1F2 + H5N4E2 + H5N5E1F1 + H6N5E1 + H4N6E1F1 + H5N4L1E1F1
+ H5N4E1F3 + H5N4E2F1 + H5N5L1E1 + H5N5E1F2 + H6N5E1F1 + H5N5E2 + H5N6E1F1 +H6N6E1 + H6N5L1E1 + H5N5E1F3 + H6N5E1F2 + H6N5E2 + H6N6E1F1 + H7N6E1 + H5N4L1E2F1 + H5N5L1E1F2 +
H6N5L1E1F1 + H6N5E1F3 + H5N5E2F2 + H6N6E1F2 + H7N6E1F1 + H6N6E2 + H6N5L2E1 + H6N5E1F4 + H6N5L1E2 + H7N6L1E1 + H6N6E1F3 + H7N6E1F2 + H7N6E2 + H6N5L2E1F1 +H6N5L1E1F3 + H8N7E1 + H6N5L1E2F1 +
+ H6N6E1F4 + H7N6E1F3 + H6N6E2F2 + H6N5L2E2 + H8N7E1F1 + H6N6L1E1F3 + H6N5E3F2 + H7N6E1F4 + H7N6L1E2 + H7N6E3 + H6N5L2E2F1 + H8N7E1F2 + H8N7E2 + H7N6L2E1F1 +H6N5E3F3 + H9N8E1 + H7N6L1E2F1 + H7N6E3F1 + H8N7E1F3 + H7N6L3E1 +
H7N6L2E2 + H9N8E1F1 + H7N6L1E3 + H6N5L2E3F1 + H8N7E3 + H7N6L2E2F1 + H9N8E2 + H10N9E1 + H8N7L3E1 + H8N7L2E2 + H9N8L2E1)) /
(1 * (H5N2 + H6N2 + H4N3F1 + H5N3 + H3N4F1 + H3N5 + H7N2 + H4N3F2 + H5N3F1 + H4N3E1 + H6N3 + H3N4F2 + H4N4F1 + H5N4 + H3N5F1 + H4N5 +
H8N2 + H5N3F2 + H4N3E1F1 + H6N3F1 + H5N3E1 + H4N4F2 + H5N4F1 + H4N4E1 + H6N4 + H3N5F2 + H4N5F1 + H4N3L1F2 + H5N5 + H5N3L1F1 + H3N6F1 + H9N2 + H6N3F2 + H7N3F1 + H5N4L1 + H6N3E1 + H5N4F2 + H4N4E1F1 + H6N4F1 + H5N4E1 + H4N5F2 + H5N5F1 + H4N5E1 + H6N5 +
H3N6F2 + H6N3L1F1 + H4N6F1 + H10N2 + H5N4L1F1 + H6N3E1F1 + H6N4F2 + H4N5L1F1 + H5N4E1F1 + H4N5F3 + H5N5F2 + H4N5E1F1 + H6N5F1 + H3N6F3 + H5N5E1 + H4N6F2 + H5N4L2 + H5N6F1 + H5N4L1F2 + H5N4F4 + H5N4L1E1 + H5N4E1F2 + H6N4E1F1 + H5N4E2 + H5N5F3 + H6N5F2
+ H5N5E1F1 + H6N5E1 + H5N4L2F1 + H5N6F2 + H4N6E1F1 + H5N4L1F3 + H6N6F1 + H7N6 + H5N4L1E1F1 + H5N4E1F3 + H5N4E2F1 + H5N5F4 + H5N5L1E1 + H6N5F3 + H5N5E1F2 + H6N5E1F1 + H5N5E2 + H5N6F3 + H6N6F2 + H5N6E1F1 + H7N6F1 + H6N6E1 + H5N7F2 + H6N5L2 + H5N5L1F3 +
H6N7F1 + H6N5L1F2 + H7N7 + H6N5F4 + H6N5L1E1 + H5N5E1F3 + H6N5E1F2 + H6N6L1F1 + H5N6F4 + H9N5F1 + H6N5E2 + H6N6F3 + H7N6F2 + H6N6E1F1 + H5N5L2F2 + H5N7F3 + H7N6E1 + H5N4L1E2F1 + H6N7F2 + H6N5L1F3 + H7N7F1 + H5N5L1E1F2 + H8N7 + H6N5L1E1F1 + H6N5E1F3 +
H5N5E2F2 + H7N6L1F1 + H6N6F4 + H7N6F3 + H6N6E1F2 + H6N5L3 + H7N6E1F1 + H6N6E2 + H6N7F3 + H6N5L1F4 + H7N7F2 + H6N5L2E1 + H8N7F1 + H6N5E1F4 + H6N5L1E2 + H7N8F1 + H7N6L1F2 + H8N8 + H7N6F4 + H7N6L1E1 + H6N6E1F3 + H6N5L3F1 + H7N6E1F2 + H6N7F4 + H7N6E2 +
H7N7F3 + H6N5L2E1F1 + H8N7F2 + H6N5L1E1F3 + H8N7E1 + H6N5L1E2F1 + H7N8F2 + H8N8F1 + H5N5L3F3 + H9N8 + H6N6E1F4 + H7N6E1F3 + H6N6E2F2 + H8N9 + H7N7F4 + H8N7F3 + H6N5L2E2 + H8N7E1F1 + H7N6L2F2 + H7N8F3 + H8N8F2 + H6N6L1E1F3 + H9N8F1 + H6N5E3F2 +
H7N6E1F4 + H7N6L1E2 + H9N9 + H8N7F4 + H7N6E3 + H6N5L2E2F1 + H8N7E1F2 + H7N8F4 + H8N7E2 + H8N8F3 + H7N6L2E1F1 + H9N8F2 + H6N5E3F3 + H9N8E1 + H7N6L1E2F1 + H9N9F1 + H10N9 + H7N6E3F1 + H7N6L3F2 + H8N7E1F3 + H7N6L3E1 + H8N8F4 + H9N8F3 + H7N6L2E2 + H9N8E1F1
+ H9N9F2 + H7N6L1E3 + H7N6L4F1 + H10N9F1 + H6N5L2E3F1 + H10N10 + H9N8F4 + H8N7E3 + H7N6L2E2F1 + H9N8E2 + H9N9F3 + H10N9F2 + H10N9E1 + H10N10F1 + H9N8F5 + H8N7L3E1 + H10N9F3 + H8N7L2E2 + H10N10F2 + H9N8L2E1)).
EXECUTE.
COMPUTE CLF = (1 * (H5N4L1F1 + H4N5L1F1 + H5N4L1F2 + H5N4L2F1 + H5N4L1F3 + H5N4L1E1F1 + H5N5L1F3 + H6N5L1F2 + H6N6L1F1 + H5N5L2F2 + H5N4L1E2F1 + H6N5L1F3 + H5N5L1E1F2 + H6N5L1E1F1 +
H7N6L1F1 + H6N5L1F4 +H7N6L1F2 + H6N5L3F1 + H6N5L2E1F1 +H6N5L1E1F3 + H6N5L1E2F1 + H5N5L3F3 + + H6N6E1F4 + H7N6L2F2 + H6N6L1E1F3 + H6N5L2E2F1 +
H7N6L2E1F1 + H7N6L1E2F1 + H7N6L3F2 + H7N6L4F1 + H6N5L2E3F1 + H7N6L2E2F1)) /
(1 * (H5N2 + H6N2 + H4N3F1 + H5N3 + H3N4F1 + H3N5 + H7N2 + H4N3F2 + H5N3F1 + H4N3E1 + H6N3 + H3N4F2 + H4N4F1 + H5N4 + H3N5F1 + H4N5 +
H8N2 + H5N3F2 + H4N3E1F1 + H6N3F1 + H5N3E1 + H4N4F2 + H5N4F1 + H4N4E1 + H6N4 + H3N5F2 + H4N5F1 + H4N3L1F2 + H5N5 + H5N3L1F1 + H3N6F1 + H9N2 + H6N3F2 + H7N3F1 + H5N4L1 + H6N3E1 + H5N4F2 + H4N4E1F1 + H6N4F1 + H5N4E1 + H4N5F2 + H5N5F1 + H4N5E1 + H6N5 +
H3N6F2 + H6N3L1F1 + H4N6F1 + H10N2 + H5N4L1F1 + H6N3E1F1 + H6N4F2 + H4N5L1F1 + H5N4E1F1 + H4N5F3 + H5N5F2 + H4N5E1F1 + H6N5F1 + H3N6F3 + H5N5E1 + H4N6F2 + H5N4L2 + H5N6F1 + H5N4L1F2 + H5N4F4 + H5N4L1E1 + H5N4E1F2 + H6N4E1F1 + H5N4E2 + H5N5F3 + H6N5F2
+ H5N5E1F1 + H6N5E1 + H5N4L2F1 + H5N6F2 + H4N6E1F1 + H5N4L1F3 + H6N6F1 + H7N6 + H5N4L1E1F1 + H5N4E1F3 + H5N4E2F1 + H5N5F4 + H5N5L1E1 + H6N5F3 + H5N5E1F2 + H6N5E1F1 + H5N5E2 + H5N6F3 + H6N6F2 + H5N6E1F1 + H7N6F1 + H6N6E1 + H5N7F2 + H6N5L2 + H5N5L1F3 +
H6N7F1 + H6N5L1F2 + H7N7 + H6N5F4 + H6N5L1E1 + H5N5E1F3 + H6N5E1F2 + H6N6L1F1 + H5N6F4 + H9N5F1 + H6N5E2 + H6N6F3 + H7N6F2 + H6N6E1F1 + H5N5L2F2 + H5N7F3 + H7N6E1 + H5N4L1E2F1 + H6N7F2 + H6N5L1F3 + H7N7F1 + H5N5L1E1F2 + H8N7 + H6N5L1E1F1 + H6N5E1F3 +
H5N5E2F2 + H7N6L1F1 + H6N6F4 + H7N6F3 + H6N6E1F2 + H6N5L3 + H7N6E1F1 + H6N6E2 + H6N7F3 + H6N5L1F4 + H7N7F2 + H6N5L2E1 + H8N7F1 + H6N5E1F4 + H6N5L1E2 + H7N8F1 + H7N6L1F2 + H8N8 + H7N6F4 + H7N6L1E1 + H6N6E1F3 + H6N5L3F1 + H7N6E1F2 + H6N7F4 + H7N6E2 +
H7N7F3 + H6N5L2E1F1 + H8N7F2 + H6N5L1E1F3 + H8N7E1 + H6N5L1E2F1 + H7N8F2 + H8N8F1 + H5N5L3F3 + H9N8 + H6N6E1F4 + H7N6E1F3 + H6N6E2F2 + H8N9 + H7N7F4 + H8N7F3 + H6N5L2E2 + H8N7E1F1 + H7N6L2F2 + H7N8F3 + H8N8F2 + H6N6L1E1F3 + H9N8F1 + H6N5E3F2 +
H7N6E1F4 + H7N6L1E2 + H9N9 + H8N7F4 + H7N6E3 + H6N5L2E2F1 + H8N7E1F2 + H7N8F4 + H8N7E2 + H8N8F3 + H7N6L2E1F1 + H9N8F2 + H6N5E3F3 + H9N8E1 + H7N6L1E2F1 + H9N9F1 + H10N9 + H7N6E3F1 + H7N6L3F2 + H8N7E1F3 + H7N6L3E1 + H8N8F4 + H9N8F3 + H7N6L2E2 + H9N8E1F1
+ H9N9F2 + H7N6L1E3 + H7N6L4F1 + H10N9F1 + H6N5L2E3F1 + H10N10 + H9N8F4 + H8N7E3 + H7N6L2E2F1 + H9N8E2 + H9N9F3 + H10N9F2 + H10N9E1 + H10N10F1 + H9N8F5 + H8N7L3E1 + H10N9F3 + H8N7L2E2 + H10N10F2 + H9N8L2E1)).
EXECUTE.
COMPUTE CLFa = (1 * (H5N4L1F2 + H5N4L1F3 + H5N5L1F3 + H6N5L1F2 + H5N5L2F2 + H6N5L1F3 + H5N5L1E1F2 + H6N5L1F4 +H7N6L1F2 + H6N5L1E1F3 + H5N5L3F3 + + H6N6E1F4 + H7N6L2F2 + H6N6L1E1F3 + H7N6L3F2)) /
(1 * (H5N2 + H6N2 + H4N3F1 + H5N3 + H3N4F1 + H3N5 + H7N2 + H4N3F2 + H5N3F1 + H4N3E1 + H6N3 + H3N4F2 + H4N4F1 + H5N4 + H3N5F1 + H4N5 +
H8N2 + H5N3F2 + H4N3E1F1 + H6N3F1 + H5N3E1 + H4N4F2 + H5N4F1 + H4N4E1 + H6N4 + H3N5F2 + H4N5F1 + H4N3L1F2 + H5N5 + H5N3L1F1 + H3N6F1 + H9N2 + H6N3F2 + H7N3F1 + H5N4L1 + H6N3E1 + H5N4F2 + H4N4E1F1 + H6N4F1 + H5N4E1 + H4N5F2 + H5N5F1 + H4N5E1 + H6N5 +
H3N6F2 + H6N3L1F1 + H4N6F1 + H10N2 + H5N4L1F1 + H6N3E1F1 + H6N4F2 + H4N5L1F1 + H5N4E1F1 + H4N5F3 + H5N5F2 + H4N5E1F1 + H6N5F1 + H3N6F3 + H5N5E1 + H4N6F2 + H5N4L2 + H5N6F1 + H5N4L1F2 + H5N4F4 + H5N4L1E1 + H5N4E1F2 + H6N4E1F1 + H5N4E2 + H5N5F3 + H6N5F2
+ H5N5E1F1 + H6N5E1 + H5N4L2F1 + H5N6F2 + H4N6E1F1 + H5N4L1F3 + H6N6F1 + H7N6 + H5N4L1E1F1 + H5N4E1F3 + H5N4E2F1 + H5N5F4 + H5N5L1E1 + H6N5F3 + H5N5E1F2 + H6N5E1F1 + H5N5E2 + H5N6F3 + H6N6F2 + H5N6E1F1 + H7N6F1 + H6N6E1 + H5N7F2 + H6N5L2 + H5N5L1F3 +
H6N7F1 + H6N5L1F2 + H7N7 + H6N5F4 + H6N5L1E1 + H5N5E1F3 + H6N5E1F2 + H6N6L1F1 + H5N6F4 + H9N5F1 + H6N5E2 + H6N6F3 + H7N6F2 + H6N6E1F1 + H5N5L2F2 + H5N7F3 + H7N6E1 + H5N4L1E2F1 + H6N7F2 + H6N5L1F3 + H7N7F1 + H5N5L1E1F2 + H8N7 + H6N5L1E1F1 + H6N5E1F3 +
H5N5E2F2 + H7N6L1F1 + H6N6F4 + H7N6F3 + H6N6E1F2 + H6N5L3 + H7N6E1F1 + H6N6E2 + H6N7F3 + H6N5L1F4 + H7N7F2 + H6N5L2E1 + H8N7F1 + H6N5E1F4 + H6N5L1E2 + H7N8F1 + H7N6L1F2 + H8N8 + H7N6F4 + H7N6L1E1 + H6N6E1F3 + H6N5L3F1 + H7N6E1F2 + H6N7F4 + H7N6E2 +
H7N7F3 + H6N5L2E1F1 + H8N7F2 + H6N5L1E1F3 + H8N7E1 + H6N5L1E2F1 + H7N8F2 + H8N8F1 + H5N5L3F3 + H9N8 + H6N6E1F4 + H7N6E1F3 + H6N6E2F2 + H8N9 + H7N7F4 + H8N7F3 + H6N5L2E2 + H8N7E1F1 + H7N6L2F2 + H7N8F3 + H8N8F2 + H6N6L1E1F3 + H9N8F1 + H6N5E3F2 +
H7N6E1F4 + H7N6L1E2 + H9N9 + H8N7F4 + H7N6E3 + H6N5L2E2F1 + H8N7E1F2 + H7N8F4 + H8N7E2 + H8N8F3 + H7N6L2E1F1 + H9N8F2 + H6N5E3F3 + H9N8E1 + H7N6L1E2F1 + H9N9F1 + H10N9 + H7N6E3F1 + H7N6L3F2 + H8N7E1F3 + H7N6L3E1 + H8N8F4 + H9N8F3 + H7N6L2E2 + H9N8E1F1
+ H9N9F2 + H7N6L1E3 + H7N6L4F1 + H10N9F1 + H6N5L2E3F1 + H10N10 + H9N8F4 + H8N7E3 + H7N6L2E2F1 + H9N8E2 + H9N9F3 + H10N9F2 + H10N9E1 + H10N10F1 + H9N8F5 + H8N7L3E1 + H10N9F3 + H8N7L2E2 + H10N10F2 + H9N8L2E1)).
EXECUTE.
COMPUTE MM = (5 * (H5N2) + 6 * (H6N2) + 7 * (H7N2) + 8 * (H8N2) + 9 * (H9N2) + 10 * (H10N2)) / (1 * (H5N2 + H6N2 + H7N2 + H8N2 + H9N2 + H10N2)).
EXECUTE.
COMPUTE A2F = (1 * (H3N4F1 + H3N4F2 + H4N4F1 + H4N4F2 + H5N4F1 + H5N4F2 + H4N4E1F1 + H6N4F1 + H5N4L1F1 + H6N4F2 + H5N4E1F1 + H5N4L1F2 + H5N4F4 + H5N4E1F2 + H6N4E1F1 + H5N4L2F1 + H5N4L1F3 + H5N4L1E1F1 + H5N4E1F3 + H5N4E2F1 + H5N4L1E2F1)) / (1 * (H3N4F1
+ H3N4F2 + H4N4F1 + H5N4 + H4N4F2 + H5N4F1 + H4N4E1 + H6N4 + H5N4L1 + H5N4F2 + H4N4E1F1 + H6N4F1 + H5N4E1 + H5N4L1F1 + H6N4F2 + H5N4E1F1 + H5N4L2 + H5N4L1F2 + H5N4F4 + H5N4L1E1 + H5N4E1F2 + H6N4E1F1 + H5N4E2 + H5N4L2F1 + H5N4L1F3 + H5N4L1E1F1 +
H5N4E1F3 + H5N4E2F1 + H5N4L1E2F1)).
EXECUTE.
COMPUTE A3F = (1 * (H3N5F1 + H3N5F2 + H4N5F1 + H4N5F2 + H5N5F1 + H4N5L1F1 + H4N5F3 + H5N5F2 + H4N5E1F1 + H6N5F1 + H5N5F3 + H6N5F2 + H5N5E1F1 + H5N5F4 + H6N5F3 + H5N5E1F2 + H6N5E1F1 + H5N5L1F3 + H6N5L1F2 + H6N5F4 + H5N5E1F3 + H6N5E1F2 + H9N5F1 +
H5N5L2F2 + H6N5L1F3 + H5N5L1E1F2 + H6N5L1E1F1 + H6N5E1F3 + H5N5E2F2 + H6N5L1F4 + H6N5E1F4 + H6N5L3F1 + H6N5L2E1F1 + H6N5L1E1F3 + H6N5L1E2F1 + H5N5L3F3 + H6N5E3F2 + H6N5L2E2F1 + H6N5E3F3 + H6N5L2E3F1)) / (1 * (H3N5 + H3N5F1 + H4N5 + H3N5F2 + H4N5F1 +
H5N5 + H4N5F2 + H5N5F1 + H4N5E1 + H6N5 + H4N5L1F1 + H4N5F3 + H5N5F2 + H4N5E1F1 + H6N5F1 + H5N5E1 + H5N5F3 + H6N5F2 + H5N5E1F1 + H6N5E1 + H5N5F4 + H5N5L1E1 + H6N5F3 + H5N5E1F2 + H6N5E1F1 + H5N5E2 + H6N5L2 + H5N5L1F3 + H6N5L1F2 + H6N5F4 + H6N5L1E1 +
H5N5E1F3 + H6N5E1F2 + H9N5F1 + H6N5E2 + H5N5L2F2 + H6N5L1F3 + H5N5L1E1F2 + H6N5L1E1F1 + H6N5E1F3 + H5N5E2F2 + H6N5L3 + H6N5L1F4 + H6N5L2E1 + H6N5E1F4 + H6N5L1E2 + H6N5L3F1 + H6N5L2E1F1 + H6N5L1E1F3 + H6N5L1E2F1 + H5N5L3F3 + H6N5L2E2 + H6N5E3F2 +
H6N5L2E2F1 + H6N5E3F3 + H6N5L2E3F1)).
EXECUTE.
COMPUTE A4F = (1 * (H3N6F1 + H3N6F2 + H4N6F1 + H3N6F3 + H4N6F2 + H5N6F1 + H5N6F2 + H4N6E1F1 + H6N6F1 + H5N6F3 + H6N6F2 + H5N6E1F1 + H7N6F1 + H6N6L1F1 + H5N6F4 + H6N6F3 + H7N6F2 + H6N6E1F1 + H7N6L1F1 + H6N6F4 + H7N6F3 + H6N6E1F2 + H7N6E1F1 + H7N6L1F2 +
H7N6F4 + H6N6E1F3 + H7N6E1F2 + H6N6E1F4 + H7N6E1F3 + H6N6E2F2 + H7N6L2F2 + H6N6L1E1F3 + H7N6E1F4 + H7N6L2E1F1 + H7N6L1E2F1 + H7N6E3F1 + H7N6L3F2 + H7N6L4F1 + H7N6L2E2F1)) / (1 * (H3N6F1 + H3N6F2 + H4N6F1 + H3N6F3 + H4N6F2 + H5N6F1 + H5N6F2 + H4N6E1F1
+ H6N6F1 + H7N6 + H5N6F3 + H6N6F2 + H5N6E1F1 + H7N6F1 + H6N6E1 + H6N6L1F1 + H5N6F4 + H6N6F3 + H7N6F2 + H6N6E1F1 + H7N6E1 + H7N6L1F1 + H6N6F4 + H7N6F3 + H6N6E1F2 + H7N6E1F1 + H6N6E2 + H7N6L1F2 + H7N6F4 + H7N6L1E1 + H6N6E1F3 + H7N6E1F2 + H7N6E2 +
H6N6E1F4 + H7N6E1F3 + H6N6E2F2 + H7N6L2F2 + H6N6L1E1F3 + H7N6E1F4 + H7N6L1E2 + H7N6E3 + H7N6L2E1F1 + H7N6L1E2F1 + H7N6E3F1 + H7N6L3F2 + H7N6L3E1 + H7N6L2E2 + H7N6L1E3 + H7N6L4F1 + H7N6L2E2F1)).
EXECUTE.
COMPUTE ALNF = (1 * (H8N7F1 + H8N7F2 + H8N7F3 + H8N7E1F1 + H9N8F1 + H8N7F4 + H8N7E1F2 + H9N8F2 + H8N7E1F3 + H9N8F3 + H9N8E1F1 + H10N9F1 + H9N8F4 + H10N9F2 + H9N8F5 + H10N9F3)) / (1 * (H8N7 + H8N7F1 + H8N7F2 + H8N7E1 + H9N8 + H8N7F3 + H8N7E1F1 + H9N8F1
+ H8N7F4 + H8N7E1F2 + H8N7E2 + H9N8F2 + H9N8E1 + H10N9 + H8N7E1F3 + H9N8F3 + H9N8E1F1 + H10N9F1 + H9N8F4 + H8N7E3 + H9N8E2 + H10N9F2 + H10N9E1 + H9N8F5 + H8N7L3E1 + H10N9F3 + H8N7L2E2 + H9N8L2E1)).
EXECUTE.
COMPUTE A2Fa = (1 * (H3N4F2 + H4N4F2 + H5N4F2 + H6N4F2 + H5N4L1F2 + H5N4F4 + H5N4E1F2 + H5N4L1F3 + H5N4E1F3)) / (1 * (H3N4F1 + H3N4F2 + H4N4F1 + H5N4 + H4N4F2 + H5N4F1 + H4N4E1 + H6N4 + H5N4L1 + H5N4F2 + H4N4E1F1 + H6N4F1 + H5N4E1 + H5N4L1F1 + H6N4F2
+ H5N4E1F1 + H5N4L2 + H5N4L1F2 + H5N4F4 + H5N4L1E1 + H5N4E1F2 + H6N4E1F1 + H5N4E2 + H5N4L2F1 + H5N4L1F3 + H5N4L1E1F1 + H5N4E1F3 + H5N4E2F1 + H5N4L1E2F1)).
EXECUTE.
COMPUTE A3Fa = (1 * (H3N5F2 + H4N5F2 + H4N5F3 + H5N5F2 + H5N5F3 + H6N5F2 + H5N5F4 + H6N5F3 + H5N5E1F2 + H5N5L1F3 + H6N5L1F2 + H6N5F4 + H5N5E1F3 + H6N5E1F2 + H5N5L2F2 + H6N5L1F3 + H5N5L1E1F2 + H6N5E1F3 + H5N5E2F2 + H6N5L1F4 + H6N5E1F4 + H6N5L1E1F3 +
H5N5L3F3 + H6N5E3F2 + H6N5E3F3)) / (1 * (H3N5 + H3N5F1 + H4N5 + H3N5F2 + H4N5F1 + H5N5 + H4N5F2 + H5N5F1 + H4N5E1 + H6N5 + H4N5L1F1 + H4N5F3 + H5N5F2 + H4N5E1F1 + H6N5F1 + H5N5E1 + H5N5F3 + H6N5F2 + H5N5E1F1 + H6N5E1 + H5N5F4 + H5N5L1E1 + H6N5F3 +
H5N5E1F2 + H6N5E1F1 + H5N5E2 + H6N5L2 + H5N5L1F3 + H6N5L1F2 + H6N5F4 + H6N5L1E1 + H5N5E1F3 + H6N5E1F2 + H9N5F1 + H6N5E2 + H5N5L2F2 + H6N5L1F3 + H5N5L1E1F2 + H6N5L1E1F1 + H6N5E1F3 + H5N5E2F2 + H6N5L3 + H6N5L1F4 + H6N5L2E1 + H6N5E1F4 + H6N5L1E2 +
H6N5L3F1 + H6N5L2E1F1 + H6N5L1E1F3 + H6N5L1E2F1 + H5N5L3F3 + H6N5L2E2 + H6N5E3F2 + H6N5L2E2F1 + H6N5E3F3 + H6N5L2E3F1)).
EXECUTE.
COMPUTE A4Fa = (1 * (H3N6F2 + H3N6F3 + H4N6F2 + H5N6F2 + H5N6F3 + H6N6F2 + H5N6F4 + H6N6F3 + H7N6F2 + H6N6F4 + H7N6F3 + H6N6E1F2 + H7N6L1F2 + H7N6F4 + H6N6E1F3 + H7N6E1F2 + H6N6E1F4 + H7N6E1F3 + H6N6E2F2 + H7N6L2F2 + H6N6L1E1F3 + H7N6E1F4 + H7N6L3F2))
/ (1 * (H3N6F1 + H3N6F2 + H4N6F1 + H3N6F3 + H4N6F2 + H5N6F1 + H5N6F2 + H4N6E1F1 + H6N6F1 + H7N6 + H5N6F3 + H6N6F2 + H5N6E1F1 + H7N6F1 + H6N6E1 + H6N6L1F1 + H5N6F4 + H6N6F3 + H7N6F2 + H6N6E1F1 + H7N6E1 + H7N6L1F1 + H6N6F4 + H7N6F3 + H6N6E1F2 + H7N6E1F1
+ H6N6E2 + H7N6L1F2 + H7N6F4 + H7N6L1E1 + H6N6E1F3 + H7N6E1F2 + H7N6E2 + H6N6E1F4 + H7N6E1F3 + H6N6E2F2 + H7N6L2F2 + H6N6L1E1F3 + H7N6E1F4 + H7N6L1E2 + H7N6E3 + H7N6L2E1F1 + H7N6L1E2F1 + H7N6E3F1 + H7N6L3F2 + H7N6L3E1 + H7N6L2E2 + H7N6L1E3 + H7N6L4F1
+ H7N6L2E2F1)).
EXECUTE.
COMPUTE ALNFa = (1 * (H8N7F2 + H8N7F3 + H8N7F4 + H8N7E1F2 + H9N8F2 + H8N7E1F3 + H9N8F3 + H9N8F4 + H10N9F2 + H9N8F5 + H10N9F3)) / (1 * (H8N7 + H8N7F1 + H8N7F2 + H8N7E1 + H9N8 + H8N7F3 + H8N7E1F1 + H9N8F1 + H8N7F4 + H8N7E1F2 + H8N7E2 + H9N8F2 + H9N8E1 +
H10N9 + H8N7E1F3 + H9N8F3 + H9N8E1F1 + H10N9F1 + H9N8F4 + H8N7E3 + H9N8E2 + H10N9F2 + H10N9E1 + H9N8F5 + H8N7L3E1 + H10N9F3 + H8N7L2E2 + H9N8L2E1)).
EXECUTE.
COMPUTE A2G = (1/2 * (H4N4F1 + H4N4F2 + H4N4E1 + H4N4E1F1) + 2/2 * (H5N4 + H5N4F1 + H5N4L1 + H5N4F2 + H5N4E1 + H5N4L1F1 + H5N4E1F1 + H5N4L2 + H5N4L1F2 + H5N4F4 + H5N4L1E1 + H5N4E1F2 + H5N4E2 + H5N4L2F1 + H5N4L1F3 + H5N4L1E1F1 + H5N4E1F3 + H5N4E2F1 +
H5N4L1E2F1)) / (1 * (H3N4F1 + H3N4F2 + H4N4F1 + H5N4 + H4N4F2 + H5N4F1 + H4N4E1 + H6N4 + H5N4L1 + H5N4F2 + H4N4E1F1 + H6N4F1 + H5N4E1 + H5N4L1F1 + H6N4F2 + H5N4E1F1 + H5N4L2 + H5N4L1F2 + H5N4F4 + H5N4L1E1 + H5N4E1F2 + H6N4E1F1 + H5N4E2 + H5N4L2F1 +
H5N4L1F3 + H5N4L1E1F1 + H5N4E1F3 + H5N4E2F1 + H5N4L1E2F1)).
EXECUTE.
COMPUTE A3G = (1/3 * (H4N5 + H4N5F1 + H4N5F2 + H4N5E1 + H4N5L1F1 + H4N5F3 + H4N5E1F1) + 2/3 * (H5N5 + H5N5F1 + H5N5F2 + H5N5E1 + H5N5F3 + H5N5E1F1 + H5N5F4 + H5N5L1E1 + H5N5E1F2 + H5N5E2 + H5N5L1F3 + H5N5E1F3 + H5N5L2F2 + H5N5L1E1F2 + H5N5E2F2 +
H5N5L3F3) + 3/3 * (H6N5 + H6N5F1 + H6N5F2 + H6N5E1 + H6N5F3 + H6N5E1F1 + H6N5L2 + H6N5L1F2 + H6N5F4 + H6N5L1E1 + H6N5E1F2 + H6N5E2 + H6N5L1F3 + H6N5L1E1F1 + H6N5E1F3 + H6N5L3 + H6N5L1F4 + H6N5L2E1 + H6N5E1F4 + H6N5L1E2 + H6N5L3F1 + H6N5L2E1F1 +
H6N5L1E1F3 + H6N5L1E2F1 + H6N5L2E2 + H6N5E3F2 + H6N5L2E2F1 + H6N5E3F3 + H6N5L2E3F1)) / (1 * (H3N5 + H3N5F1 + H4N5 + H3N5F2 + H4N5F1 + H5N5 + H4N5F2 + H5N5F1 + H4N5E1 + H6N5 + H4N5L1F1 + H4N5F3 + H5N5F2 + H4N5E1F1 + H6N5F1 + H5N5E1 + H5N5F3 + H6N5F2 +
H5N5E1F1 + H6N5E1 + H5N5F4 + H5N5L1E1 + H6N5F3 + H5N5E1F2 + H6N5E1F1 + H5N5E2 + H6N5L2 + H5N5L1F3 + H6N5L1F2 + H6N5F4 + H6N5L1E1 + H5N5E1F3 + H6N5E1F2 + H9N5F1 + H6N5E2 + H5N5L2F2 + H6N5L1F3 + H5N5L1E1F2 + H6N5L1E1F1 + H6N5E1F3 + H5N5E2F2 + H6N5L3 +
H6N5L1F4 + H6N5L2E1 + H6N5E1F4 + H6N5L1E2 + H6N5L3F1 + H6N5L2E1F1 + H6N5L1E1F3 + H6N5L1E2F1 + H5N5L3F3 + H6N5L2E2 + H6N5E3F2 + H6N5L2E2F1 + H6N5E3F3 + H6N5L2E3F1)).
EXECUTE.
COMPUTE A4G = (1/4 * (H4N6F1 + H4N6F2 + H4N6E1F1) + 2/4 * (H5N6F1 + H5N6F2 + H5N6F3 + H5N6E1F1 + H5N6F4) + 3/4 * (H6N6F1 + H6N6F2 + H6N6E1 + H6N6L1F1 + H6N6F3 + H6N6E1F1 + H6N6F4 + H6N6E1F2 + H6N6E2 + H6N6E1F3 + H6N6E1F4 + H6N6E2F2 + H6N6L1E1F3) + 4/4
* (H7N6 + H7N6F1 + H7N6F2 + H7N6E1 + H7N6L1F1 + H7N6F3 + H7N6E1F1 + H7N6L1F2 + H7N6F4 + H7N6L1E1 + H7N6E1F2 + H7N6E2 + H7N6E1F3 + H7N6L2F2 + H7N6E1F4 + H7N6L1E2 + H7N6E3 + H7N6L2E1F1 + H7N6L1E2F1 + H7N6E3F1 + H7N6L3F2 + H7N6L3E1 + H7N6L2E2 + H7N6L1E3
+ H7N6L4F1 + H7N6L2E2F1)) / (1 * (H3N6F1 + H3N6F2 + H4N6F1 + H3N6F3 + H4N6F2 + H5N6F1 + H5N6F2 + H4N6E1F1 + H6N6F1 + H7N6 + H5N6F3 + H6N6F2 + H5N6E1F1 + H7N6F1 + H6N6E1 + H6N6L1F1 + H5N6F4 + H6N6F3 + H7N6F2 + H6N6E1F1 + H7N6E1 + H7N6L1F1 + H6N6F4 +
H7N6F3 + H6N6E1F2 + H7N6E1F1 + H6N6E2 + H7N6L1F2 + H7N6F4 + H7N6L1E1 + H6N6E1F3 + H7N6E1F2 + H7N6E2 + H6N6E1F4 + H7N6E1F3 + H6N6E2F2 + H7N6L2F2 + H6N6L1E1F3 + H7N6E1F4 + H7N6L1E2 + H7N6E3 + H7N6L2E1F1 + H7N6L1E2F1 + H7N6E3F1 + H7N6L3F2 + H7N6L3E1 +
H7N6L2E2 + H7N6L1E3 + H7N6L4F1 + H7N6L2E2F1)).
EXECUTE.
COMPUTE A2F0G = (1/2 * (H4N4E1) + 2/2 * (H5N4 + H5N4L1 + H5N4E1 + H5N4L2 + H5N4L1E1 + H5N4E2)) / (1 * (H5N4 + H4N4E1 + H6N4 + H5N4L1 + H5N4E1 + H5N4L2 + H5N4L1E1 + H5N4E2)).
EXECUTE.
COMPUTE A3F0G = (1/3 * (H4N5 + H4N5E1) + 2/3 * (H5N5 + H5N5E1 + H5N5L1E1 + H5N5E2) + 3/3 * (H6N5 + H6N5E1 + H6N5L2 + H6N5L1E1 + H6N5E2 + H6N5L3 + H6N5L2E1 + H6N5L1E2 + H6N5L2E2)) / (1 * (H3N5 + H4N5 + H5N5 + H4N5E1 + H6N5 + H5N5E1 + H6N5E1 + H5N5L1E1
+ H5N5E2 + H6N5L2 + H6N5L1E1 + H6N5E2 + H6N5L3 + H6N5L2E1 + H6N5L1E2 + H6N5L2E2)).
EXECUTE.
COMPUTE A4F0G = (1/4 * (0) + 2/4 * (0) + 3/4 * (H6N6E1 + H6N6E2) + 4/4 * (H7N6 + H7N6E1 + H7N6L1E1 + H7N6E2 + H7N6L1E2 + H7N6E3 + H7N6L3E1 + H7N6L2E2 + H7N6L1E3)) / (1 * (H7N6 + H6N6E1 + H7N6E1 + H6N6E2 + H7N6L1E1 + H7N6E2 + H7N6L1E2 + H7N6E3 +
H7N6L3E1 + H7N6L2E2 + H7N6L1E3)).
EXECUTE.
COMPUTE A2FG = (1/2 * (H4N4F1 + H4N4F2 + H4N4E1F1) + 2/2 * (H5N4F1 + H5N4F2 + H5N4L1F1 + H5N4E1F1 + H5N4L1F2 + H5N4F4 + H5N4E1F2 + H5N4L2F1 + H5N4L1F3 + H5N4L1E1F1 + H5N4E1F3 + H5N4E2F1 + H5N4L1E2F1)) / (1 * (H3N4F1 + H3N4F2 + H4N4F1 + H4N4F2 + H5N4F1
+ H5N4F2 + H4N4E1F1 + H6N4F1 + H5N4L1F1 + H6N4F2 + H5N4E1F1 + H5N4L1F2 + H5N4F4 + H5N4E1F2 + H6N4E1F1 + H5N4L2F1 + H5N4L1F3 + H5N4L1E1F1 + H5N4E1F3 + H5N4E2F1 + H5N4L1E2F1)).
EXECUTE.
COMPUTE A3FG = (1/3 * (H4N5F1 + H4N5F2 + H4N5L1F1 + H4N5F3 + H4N5E1F1) + 2/3 * (H5N5F1 + H5N5F2 + H5N5F3 + H5N5E1F1 + H5N5F4 + H5N5E1F2 + H5N5L1F3 + H5N5E1F3 + H5N5L2F2 + H5N5L1E1F2 + H5N5E2F2 + H5N5L3F3) + 3/3 * (H6N5F1 + H6N5F2 + H6N5F3 + H6N5E1F1 +
H6N5L1F2 + H6N5F4 + H6N5E1F2 + H6N5L1F3 + H6N5L1E1F1 + H6N5E1F3 + H6N5L1F4 + H6N5E1F4 + H6N5L3F1 + H6N5L2E1F1 + H6N5L1E1F3 + H6N5L1E2F1 + H6N5E3F2 + H6N5L2E2F1 + H6N5E3F3 + H6N5L2E3F1)) / (1 * (H3N5F1 + H3N5F2 + H4N5F1 + H4N5F2 + H5N5F1 + H4N5L1F1 +
H4N5F3 + H5N5F2 + H4N5E1F1 + H6N5F1 + H5N5F3 + H6N5F2 + H5N5E1F1 + H5N5F4 + H6N5F3 + H5N5E1F2 + H6N5E1F1 + H5N5L1F3 + H6N5L1F2 + H6N5F4 + H5N5E1F3 + H6N5E1F2 + H9N5F1 + H5N5L2F2 + H6N5L1F3 + H5N5L1E1F2 + H6N5L1E1F1 + H6N5E1F3 + H5N5E2F2 + H6N5L1F4 +
H6N5E1F4 + H6N5L3F1 + H6N5L2E1F1 + H6N5L1E1F3 + H6N5L1E2F1 + H5N5L3F3 + H6N5E3F2 + H6N5L2E2F1 + H6N5E3F3 + H6N5L2E3F1)).
EXECUTE.
COMPUTE A4FG = (1/4 * (H4N6F1 + H4N6F2 + H4N6E1F1) + 2/4 * (H5N6F1 + H5N6F2 + H5N6F3 + H5N6E1F1 + H5N6F4) + 3/4 * (H6N6F1 + H6N6F2 + H6N6L1F1 + H6N6F3 + H6N6E1F1 + H6N6F4 + H6N6E1F2 + H6N6E1F3 + H6N6E1F4 + H6N6E2F2 + H6N6L1E1F3) + 4/4 * (H7N6F1 +
H7N6F2 + H7N6L1F1 + H7N6F3 + H7N6E1F1 + H7N6L1F2 + H7N6F4 + H7N6E1F2 + H7N6E1F3 + H7N6L2F2 + H7N6E1F4 + H7N6L2E1F1 + H7N6L1E2F1 + H7N6E3F1 + H7N6L3F2 + H7N6L4F1 + H7N6L2E2F1)) / (1 * (H3N6F1 + H3N6F2 + H4N6F1 + H3N6F3 + H4N6F2 + H5N6F1 + H5N6F2 +
H4N6E1F1 + H6N6F1 + H5N6F3 + H6N6F2 + H5N6E1F1 + H7N6F1 + H6N6L1F1 + H5N6F4 + H6N6F3 + H7N6F2 + H6N6E1F1 + H7N6L1F1 + H6N6F4 + H7N6F3 + H6N6E1F2 + H7N6E1F1 + H7N6L1F2 + H7N6F4 + H6N6E1F3 + H7N6E1F2 + H6N6E1F4 + H7N6E1F3 + H6N6E2F2 + H7N6L2F2 +
H6N6L1E1F3 + H7N6E1F4 + H7N6L2E1F1 + H7N6L1E2F1 + H7N6E3F1 + H7N6L3F2 + H7N6L4F1 + H7N6L2E2F1)).
EXECUTE.
COMPUTE A2S = (1/2 * (H4N4E1 + H5N4L1 + H4N4E1F1 + H5N4E1 + H5N4L1F1 + H5N4E1F1 + H5N4L1F2 + H5N4E1F2 + H6N4E1F1 + H5N4L1F3 + H5N4E1F3) + 2/2 * (H5N4L2 + H5N4L1E1 + H5N4E2 + H5N4L2F1 + H5N4L1E1F1 + H5N4E2F1)) / (1 * (H3N4F1 + H3N4F2 + H4N4F1 + H5N4 +
H4N4F2 + H5N4F1 + H4N4E1 + H6N4 + H5N4L1 + H5N4F2 + H4N4E1F1 + H6N4F1 + H5N4E1 + H5N4L1F1 + H6N4F2 + H5N4E1F1 + H5N4L2 + H5N4L1F2 + H5N4F4 + H5N4L1E1 + H5N4E1F2 + H6N4E1F1 + H5N4E2 + H5N4L2F1 + H5N4L1F3 + H5N4L1E1F1 + H5N4E1F3 + H5N4E2F1 +
H5N4L1E2F1)).
EXECUTE.
COMPUTE A3S = (1/3 * (H4N5E1 + H4N5L1F1 + H4N5E1F1 + H5N5E1 + H5N5E1F1 + H6N5E1 + H5N5E1F2 + H6N5E1F1 + H5N5L1F3 + H6N5L1F2 + H5N5E1F3 + H6N5E1F2 + H6N5L1F3 + H6N5E1F3 + H6N5L1F4 + H6N5E1F4) + 2/3 * (H5N5L1E1 + H5N5E2 + H6N5L2 + H6N5L1E1 + H6N5E2 +
H5N5L2F2 + H5N5L1E1F2 + H6N5L1E1F1 + H5N5E2F2 + H6N5L1E1F3) + 3/3 * (H6N5L3 + H6N5L2E1 + H6N5L1E2 + H6N5L3F1 + H6N5L2E1F1 + H6N5L1E2F1 + H5N5L3F3 + H6N5E3F2 + H6N5E3F3)) / (1 * (H3N5 + H3N5F1 + H4N5 + H3N5F2 + H4N5F1 + H5N5 + H4N5F2 + H5N5F1 + H4N5E1
+ H6N5 + H4N5L1F1 + H4N5F3 + H5N5F2 + H4N5E1F1 + H6N5F1 + H5N5E1 + H5N5F3 + H6N5F2 + H5N5E1F1 + H6N5E1 + H5N5F4 + H5N5L1E1 + H6N5F3 + H5N5E1F2 + H6N5E1F1 + H5N5E2 + H6N5L2 + H5N5L1F3 + H6N5L1F2 + H6N5F4 + H6N5L1E1 + H5N5E1F3 + H6N5E1F2 + H9N5F1 +
H6N5E2 + H5N5L2F2 + H6N5L1F3 + H5N5L1E1F2 + H6N5L1E1F1 + H6N5E1F3 + H5N5E2F2 + H6N5L3 + H6N5L1F4 + H6N5L2E1 + H6N5E1F4 + H6N5L1E2 + H6N5L3F1 + H6N5L2E1F1 + H6N5L1E1F3 + H6N5L1E2F1 + H5N5L3F3 + H6N5L2E2 + H6N5E3F2 + H6N5L2E2F1 + H6N5E3F3 +
H6N5L2E3F1)).
EXECUTE.
COMPUTE A4S = (1/4 * (H4N6E1F1 + H5N6E1F1 + H6N6E1 + H6N6L1F1 + H6N6E1F1 + H7N6E1 + H7N6L1F1 + H6N6E1F2 + H7N6E1F1 + H7N6L1F2 + H6N6E1F3 + H7N6E1F2 + H6N6E1F4 + H7N6E1F3 + H7N6E1F4) + 2/4 * (H6N6E2 + H7N6L1E1 + H7N6E2 + H6N6E2F2 + H7N6L2F2 +
H6N6L1E1F3) + 3/4 * (H7N6L1E2 + H7N6E3 + H7N6L2E1F1 + H7N6L1E2F1 + H7N6E3F1 + H7N6L3F2) + 4/4 * (H7N6L3E1 + H7N6L2E2 + H7N6L1E3 + H7N6L4F1 + H7N6L2E2F1)) / (1 * (H3N6F1 + H3N6F2 + H4N6F1 + H3N6F3 + H4N6F2 + H5N6F1 + H5N6F2 + H4N6E1F1 + H6N6F1 + H7N6 +
H5N6F3 + H6N6F2 + H5N6E1F1 + H7N6F1 + H6N6E1 + H6N6L1F1 + H5N6F4 + H6N6F3 + H7N6F2 + H6N6E1F1 + H7N6E1 + H7N6L1F1 + H6N6F4 + H7N6F3 + H6N6E1F2 + H7N6E1F1 + H6N6E2 + H7N6L1F2 + H7N6F4 + H7N6L1E1 + H6N6E1F3 + H7N6E1F2 + H7N6E2 + H6N6E1F4 + H7N6E1F3 +
H6N6E2F2 + H7N6L2F2 + H6N6L1E1F3 + H7N6E1F4 + H7N6L1E2 + H7N6E3 + H7N6L2E1F1 + H7N6L1E2F1 + H7N6E3F1 + H7N6L3F2 + H7N6L3E1 + H7N6L2E2 + H7N6L1E3 + H7N6L4F1 + H7N6L2E2F1)).
EXECUTE.
COMPUTE A2F0S = (1/2 * (H4N4E1 + H5N4L1 + H5N4E1) + 2/2 * (H5N4L2 + H5N4L1E1 + H5N4E2)) / (1 * (H5N4 + H4N4E1 + H6N4 + H5N4L1 + H5N4E1 + H5N4L2 + H5N4L1E1 + H5N4E2)).
EXECUTE.
COMPUTE A3F0S = (1/3 * (H4N5E1 + H5N5E1 + H6N5E1) + 2/3 * (H5N5L1E1 + H5N5E2 + H6N5L2 + H6N5L1E1 + H6N5E2) + 3/3 * (H6N5L3 + H6N5L2E1 + H6N5L1E2)) / (1 * (H3N5 + H4N5 + H5N5 + H4N5E1 + H6N5 + H5N5E1 + H6N5E1 + H5N5L1E1 + H5N5E2 + H6N5L2 + H6N5L1E1 +
H6N5E2 + H6N5L3 + H6N5L2E1 + H6N5L1E2 + H6N5L2E2)).
EXECUTE.
COMPUTE A4F0S = (1/4 * (H6N6E1 + H7N6E1) + 2/4 * (H6N6E2 + H7N6L1E1 + H7N6E2) + 3/4 * (H7N6L1E2 + H7N6E3) + 4/4 * (H7N6L3E1 + H7N6L2E2 + H7N6L1E3)) / (1 * (H7N6 + H6N6E1 + H7N6E1 + H6N6E2 + H7N6L1E1 + H7N6E2 + H7N6L1E2 + H7N6E3 + H7N6L3E1 + H7N6L2E2 +
H7N6L1E3)).
EXECUTE.
COMPUTE A2FS = (1/2 * (H4N4E1F1 + H5N4L1F1 + H5N4E1F1 + H5N4L1F2 + H5N4E1F2 + H6N4E1F1 + H5N4L1F3 + H5N4E1F3) + 2/2 * (H5N4L2F1 + H5N4L1E1F1 + H5N4E2F1)) / (1 * (H3N4F1 + H3N4F2 + H4N4F1 + H4N4F2 + H5N4F1 + H5N4F2 + H4N4E1F1 + H6N4F1 + H5N4L1F1 +
H6N4F2 + H5N4E1F1 + H5N4L1F2 + H5N4F4 + H5N4E1F2 + H6N4E1F1 + H5N4L2F1 + H5N4L1F3 + H5N4L1E1F1 + H5N4E1F3 + H5N4E2F1 + H5N4L1E2F1)).
EXECUTE.
COMPUTE A3FS = (1/3 * (H4N5L1F1 + H4N5E1F1 + H5N5E1F1 + H5N5E1F2 + H6N5E1F1 + H5N5L1F3 + H6N5L1F2 + H5N5E1F3 + H6N5E1F2 + H6N5L1F3 + H6N5E1F3 + H6N5L1F4 + H6N5E1F4) + 2/3 * (H5N5L2F2 + H5N5L1E1F2 + H6N5L1E1F1 + H5N5E2F2 + H6N5L1E1F3) + 3/3 * (H6N5L3F1
+ H6N5L2E1F1 + H6N5L1E2F1 + H5N5L3F3 + H6N5E3F2 + H6N5E3F3)) / (1 * (H3N5F1 + H3N5F2 + H4N5F1 + H4N5F2 + H5N5F1 + H4N5L1F1 + H4N5F3 + H5N5F2 + H4N5E1F1 + H6N5F1 + H5N5F3 + H6N5F2 + H5N5E1F1 + H5N5F4 + H6N5F3 + H5N5E1F2 + H6N5E1F1 + H5N5L1F3 + H6N5L1F2
+ H6N5F4 + H5N5E1F3 + H6N5E1F2 + H9N5F1 + H5N5L2F2 + H6N5L1F3 + H5N5L1E1F2 + H6N5L1E1F1 + H6N5E1F3 + H5N5E2F2 + H6N5L1F4 + H6N5E1F4 + H6N5L3F1 + H6N5L2E1F1 + H6N5L1E1F3 + H6N5L1E2F1 + H5N5L3F3 + H6N5E3F2 + H6N5L2E2F1 + H6N5E3F3 + H6N5L2E3F1)).
EXECUTE.
COMPUTE A4FS = (1/4 * (H4N6E1F1 + H5N6E1F1 + H6N6L1F1 + H6N6E1F1 + H7N6L1F1 + H6N6E1F2 + H7N6E1F1 + H7N6L1F2 + H6N6E1F3 + H7N6E1F2 + H6N6E1F4 + H7N6E1F3 + H7N6E1F4) + 2/4 * (H6N6E2F2 + H7N6L2F2 + H6N6L1E1F3) + 3/4 * (H7N6L2E1F1 + H7N6L1E2F1 + H7N6E3F1
+ H7N6L3F2) + 4/4 * (H7N6L4F1 + H7N6L2E2F1)) / (1 * (H3N6F1 + H3N6F2 + H4N6F1 + H3N6F3 + H4N6F2 + H5N6F1 + H5N6F2 + H4N6E1F1 + H6N6F1 + H5N6F3 + H6N6F2 + H5N6E1F1 + H7N6F1 + H6N6L1F1 + H5N6F4 + H6N6F3 + H7N6F2 + H6N6E1F1 + H7N6L1F1 + H6N6F4 + H7N6F3 +
H6N6E1F2 + H7N6E1F1 + H7N6L1F2 + H7N6F4 + H6N6E1F3 + H7N6E1F2 + H6N6E1F4 + H7N6E1F3 + H6N6E2F2 + H7N6L2F2 + H6N6L1E1F3 + H7N6E1F4 + H7N6L2E1F1 + H7N6L1E2F1 + H7N6E3F1 + H7N6L3F2 + H7N6L4F1 + H7N6L2E2F1)).
EXECUTE.
COMPUTE A2L = (1/2 * (H5N4L1 + H5N4L1F1 + H5N4L1F2 + H5N4L1E1 + H5N4L1F3 + H5N4L1E1F1 + H5N4L1E2F1) + 2/2 * (H5N4L2 + H5N4L2F1)) / (1 * (H3N4F1 + H3N4F2 + H4N4F1 + H5N4 + H4N4F2 + H5N4F1 + H4N4E1 + H6N4 + H5N4L1 + H5N4F2 + H4N4E1F1 + H6N4F1 + H5N4E1 +
H5N4L1F1 + H6N4F2 + H5N4E1F1 + H5N4L2 + H5N4L1F2 + H5N4F4 + H5N4L1E1 + H5N4E1F2 + H6N4E1F1 + H5N4E2 + H5N4L2F1 + H5N4L1F3 + H5N4L1E1F1 + H5N4E1F3 + H5N4E2F1 + H5N4L1E2F1)).
EXECUTE.
COMPUTE A3L = (1/3 * (H4N5L1F1 + H5N5L1E1 + H5N5L1F3 + H6N5L1F2 + H6N5L1E1 + H6N5L1F3 + H5N5L1E1F2 + H6N5L1E1F1 + H6N5L1F4 + H6N5L1E2 + H6N5L1E1F3 + H6N5L1E2F1) + 2/3 * (H6N5L2 + H5N5L2F2 + H6N5L2E1 + H6N5L2E1F1 + H6N5L2E2 + H6N5L2E2F1 + H6N5L2E3F1) +
3/3 * (H6N5L3 + H6N5L3F1 + H5N5L3F3)) / (1 * (H3N5 + H3N5F1 + H4N5 + H3N5F2 + H4N5F1 + H5N5 + H4N5F2 + H5N5F1 + H4N5E1 + H6N5 + H4N5L1F1 + H4N5F3 + H5N5F2 + H4N5E1F1 + H6N5F1 + H5N5E1 + H5N5F3 + H6N5F2 + H5N5E1F1 + H6N5E1 + H5N5F4 + H5N5L1E1 + H6N5F3
+ H5N5E1F2 + H6N5E1F1 + H5N5E2 + H6N5L2 + H5N5L1F3 + H6N5L1F2 + H6N5F4 + H6N5L1E1 + H5N5E1F3 + H6N5E1F2 + H9N5F1 + H6N5E2 + H5N5L2F2 + H6N5L1F3 + H5N5L1E1F2 + H6N5L1E1F1 + H6N5E1F3 + H5N5E2F2 + H6N5L3 + H6N5L1F4 + H6N5L2E1 + H6N5E1F4 + H6N5L1E2 +
H6N5L3F1 + H6N5L2E1F1 + H6N5L1E1F3 + H6N5L1E2F1 + H5N5L3F3 + H6N5L2E2 + H6N5E3F2 + H6N5L2E2F1 + H6N5E3F3 + H6N5L2E3F1)).
EXECUTE.
COMPUTE A4L = (1/4 * (H6N6L1F1 + H7N6L1F1 + H7N6L1F2 + H7N6L1E1 + H6N6L1E1F3 + H7N6L1E2 + H7N6L1E2F1 + H7N6L1E3) + 2/4 * (H7N6L2F2 + H7N6L2E1F1 + H7N6L2E2 + H7N6L2E2F1) + 3/4 * (H7N6L3F2 + H7N6L3E1) + 4/4 * (H7N6L4F1)) / (1 * (H3N6F1 + H3N6F2 + H4N6F1
+ H3N6F3 + H4N6F2 + H5N6F1 + H5N6F2 + H4N6E1F1 + H6N6F1 + H7N6 + H5N6F3 + H6N6F2 + H5N6E1F1 + H7N6F1 + H6N6E1 + H6N6L1F1 + H5N6F4 + H6N6F3 + H7N6F2 + H6N6E1F1 + H7N6E1 + H7N6L1F1 + H6N6F4 + H7N6F3 + H6N6E1F2 + H7N6E1F1 + H6N6E2 + H7N6L1F2 + H7N6F4 +
H7N6L1E1 + H6N6E1F3 + H7N6E1F2 + H7N6E2 + H6N6E1F4 + H7N6E1F3 + H6N6E2F2 + H7N6L2F2 + H6N6L1E1F3 + H7N6E1F4 + H7N6L1E2 + H7N6E3 + H7N6L2E1F1 + H7N6L1E2F1 + H7N6E3F1 + H7N6L3F2 + H7N6L3E1 + H7N6L2E2 + H7N6L1E3 + H7N6L4F1 + H7N6L2E2F1)).
EXECUTE.
COMPUTE A2F0L = (1/2 * (H5N4L1 + H5N4L1E1) + 2/2 * (H5N4L2)) / (1 * (H5N4 + H4N4E1 + H6N4 + H5N4L1 + H5N4E1 + H5N4L2 + H5N4L1E1 + H5N4E2)).
EXECUTE.
COMPUTE A3F0L = (1/3 * (H5N5L1E1 + H6N5L1E1 + H6N5L1E2) + 2/3 * (H6N5L2 + H6N5L2E1 + H6N5L2E2) + 3/3 * (H6N5L3)) / (1 * (H3N5 + H4N5 + H5N5 + H4N5E1 + H6N5 + H5N5E1 + H6N5E1 + H5N5L1E1 + H5N5E2 + H6N5L2 + H6N5L1E1 + H6N5E2 + H6N5L3 + H6N5L2E1 +
H6N5L1E2 + H6N5L2E2)).
EXECUTE.
COMPUTE A4F0L = (1/4 * (H7N6L1E1 + H7N6L1E2 + H7N6L1E3) + 2/4 * (H7N6L2E2) + 3/4 * (H7N6L3E1) + 4/4 * (0)) / (1 * (H7N6 + H6N6E1 + H7N6E1 + H6N6E2 + H7N6L1E1 + H7N6E2 + H7N6L1E2 + H7N6E3 + H7N6L3E1 + H7N6L2E2 + H7N6L1E3)).
EXECUTE.
COMPUTE A2FL = (1/2 * (H5N4L1F1 + H5N4L1F2 + H5N4L1F3 + H5N4L1E1F1 + H5N4L1E2F1) + 2/2 * (H5N4L2F1)) / (1 * (H3N4F1 + H3N4F2 + H4N4F1 + H4N4F2 + H5N4F1 + H5N4F2 + H4N4E1F1 + H6N4F1 + H5N4L1F1 + H6N4F2 + H5N4E1F1 + H5N4L1F2 + H5N4F4 + H5N4E1F2 +
H6N4E1F1 + H5N4L2F1 + H5N4L1F3 + H5N4L1E1F1 + H5N4E1F3 + H5N4E2F1 + H5N4L1E2F1)).
EXECUTE.
COMPUTE A3FL = (1/3 * (H4N5L1F1 + H5N5L1F3 + H6N5L1F2 + H6N5L1F3 + H5N5L1E1F2 + H6N5L1E1F1 + H6N5L1F4 + H6N5L1E1F3 + H6N5L1E2F1) + 2/3 * (H5N5L2F2 + H6N5L2E1F1 + H6N5L2E2F1 + H6N5L2E3F1) + 3/3 * (H6N5L3F1 + H5N5L3F3)) / (1 * (H3N5F1 + H3N5F2 + H4N5F1
+ H4N5F2 + H5N5F1 + H4N5L1F1 + H4N5F3 + H5N5F2 + H4N5E1F1 + H6N5F1 + H5N5F3 + H6N5F2 + H5N5E1F1 + H5N5F4 + H6N5F3 + H5N5E1F2 + H6N5E1F1 + H5N5L1F3 + H6N5L1F2 + H6N5F4 + H5N5E1F3 + H6N5E1F2 + H9N5F1 + H5N5L2F2 + H6N5L1F3 + H5N5L1E1F2 + H6N5L1E1F1 +
H6N5E1F3 + H5N5E2F2 + H6N5L1F4 + H6N5E1F4 + H6N5L3F1 + H6N5L2E1F1 + H6N5L1E1F3 + H6N5L1E2F1 + H5N5L3F3 + H6N5E3F2 + H6N5L2E2F1 + H6N5E3F3 + H6N5L2E3F1)).
EXECUTE.
COMPUTE A4FL = (1/4 * (H6N6L1F1 + H7N6L1F1 + H7N6L1F2 + H6N6L1E1F3 + H7N6L1E2F1) + 2/4 * (H7N6L2F2 + H7N6L2E1F1 + H7N6L2E2F1) + 3/4 * (H7N6L3F2) + 4/4 * (H7N6L4F1)) / (1 * (H3N6F1 + H3N6F2 + H4N6F1 + H3N6F3 + H4N6F2 + H5N6F1 + H5N6F2 + H4N6E1F1 +
H6N6F1 + H5N6F3 + H6N6F2 + H5N6E1F1 + H7N6F1 + H6N6L1F1 + H5N6F4 + H6N6F3 + H7N6F2 + H6N6E1F1 + H7N6L1F1 + H6N6F4 + H7N6F3 + H6N6E1F2 + H7N6E1F1 + H7N6L1F2 + H7N6F4 + H6N6E1F3 + H7N6E1F2 + H6N6E1F4 + H7N6E1F3 + H6N6E2F2 + H7N6L2F2 + H6N6L1E1F3 +
H7N6E1F4 + H7N6L2E1F1 + H7N6L1E2F1 + H7N6E3F1 + H7N6L3F2 + H7N6L4F1 + H7N6L2E2F1)).
EXECUTE.
COMPUTE A2E = (1/2 * (H4N4E1 + H4N4E1F1 + H5N4E1 + H5N4E1F1 + H5N4L1E1 + H5N4E1F2 + H6N4E1F1 + H5N4L1E1F1 + H5N4E1F3) + 2/2 * (H5N4E2 + H5N4E2F1 + H5N4L1E2F1)) / (1 * (H3N4F1 + H3N4F2 + H4N4F1 + H5N4 + H4N4F2 + H5N4F1 + H4N4E1 + H6N4 + H5N4L1 + H5N4F2
+ H4N4E1F1 + H6N4F1 + H5N4E1 + H5N4L1F1 + H6N4F2 + H5N4E1F1 + H5N4L2 + H5N4L1F2 + H5N4F4 + H5N4L1E1 + H5N4E1F2 + H6N4E1F1 + H5N4E2 + H5N4L2F1 + H5N4L1F3 + H5N4L1E1F1 + H5N4E1F3 + H5N4E2F1 + H5N4L1E2F1)).
EXECUTE.
COMPUTE A3E = (1/3 * (H4N5E1 + H4N5E1F1 + H5N5E1 + H5N5E1F1 + H6N5E1 + H5N5L1E1 + H5N5E1F2 + H6N5E1F1 + H6N5L1E1 + H5N5E1F3 + H6N5E1F2 + H5N5L1E1F2 + H6N5L1E1F1 + H6N5E1F3 + H6N5L2E1 + H6N5E1F4 + H6N5L2E1F1 + H6N5L1E1F3) + 2/3 * (H5N5E2 + H6N5E2 +
H5N5E2F2 + H6N5L1E2 + H6N5L1E2F1 + H6N5L2E2 + H6N5L2E2F1) + 3/3 * (H6N5E3F2 + H6N5E3F3 + H6N5L2E3F1)) / (1 * (H3N5 + H3N5F1 + H4N5 + H3N5F2 + H4N5F1 + H5N5 + H4N5F2 + H5N5F1 + H4N5E1 + H6N5 + H4N5L1F1 + H4N5F3 + H5N5F2 + H4N5E1F1 + H6N5F1 + H5N5E1 +
H5N5F3 + H6N5F2 + H5N5E1F1 + H6N5E1 + H5N5F4 + H5N5L1E1 + H6N5F3 + H5N5E1F2 + H6N5E1F1 + H5N5E2 + H6N5L2 + H5N5L1F3 + H6N5L1F2 + H6N5F4 + H6N5L1E1 + H5N5E1F3 + H6N5E1F2 + H9N5F1 + H6N5E2 + H5N5L2F2 + H6N5L1F3 + H5N5L1E1F2 + H6N5L1E1F1 + H6N5E1F3 +
H5N5E2F2 + H6N5L3 + H6N5L1F4 + H6N5L2E1 + H6N5E1F4 + H6N5L1E2 + H6N5L3F1 + H6N5L2E1F1 + H6N5L1E1F3 + H6N5L1E2F1 + H5N5L3F3 + H6N5L2E2 + H6N5E3F2 + H6N5L2E2F1 + H6N5E3F3 + H6N5L2E3F1)).
EXECUTE.
COMPUTE A4E = (1/4 * (H4N6E1F1 + H5N6E1F1 + H6N6E1 + H6N6E1F1 + H7N6E1 + H6N6E1F2 + H7N6E1F1 + H7N6L1E1 + H6N6E1F3 + H7N6E1F2 + H6N6E1F4 + H7N6E1F3 + H6N6L1E1F3 + H7N6E1F4 + H7N6L2E1F1 + H7N6L3E1) + 2/4 * (H6N6E2 + H7N6E2 + H6N6E2F2 + H7N6L1E2 +
H7N6L1E2F1 + H7N6L2E2 + H7N6L2E2F1) + 3/4 * (H7N6E3 + H7N6E3F1 + H7N6L1E3) + 4/4 * (0)) / (1 * (H3N6F1 + H3N6F2 + H4N6F1 + H3N6F3 + H4N6F2 + H5N6F1 + H5N6F2 + H4N6E1F1 + H6N6F1 + H7N6 + H5N6F3 + H6N6F2 + H5N6E1F1 + H7N6F1 + H6N6E1 + H6N6L1F1 + H5N6F4
+ H6N6F3 + H7N6F2 + H6N6E1F1 + H7N6E1 + H7N6L1F1 + H6N6F4 + H7N6F3 + H6N6E1F2 + H7N6E1F1 + H6N6E2 + H7N6L1F2 + H7N6F4 + H7N6L1E1 + H6N6E1F3 + H7N6E1F2 + H7N6E2 + H6N6E1F4 + H7N6E1F3 + H6N6E2F2 + H7N6L2F2 + H6N6L1E1F3 + H7N6E1F4 + H7N6L1E2 + H7N6E3 +
H7N6L2E1F1 + H7N6L1E2F1 + H7N6E3F1 + H7N6L3F2 + H7N6L3E1 + H7N6L2E2 + H7N6L1E3 + H7N6L4F1 + H7N6L2E2F1)).
EXECUTE.
COMPUTE A2F0E = (1/2 * (H4N4E1 + H5N4E1 + H5N4L1E1) + 2/2 * (H5N4E2)) / (1 * (H5N4 + H4N4E1 + H6N4 + H5N4L1 + H5N4E1 + H5N4L2 + H5N4L1E1 + H5N4E2)).
EXECUTE.
COMPUTE A3F0E = (1/3 * (H4N5E1 + H5N5E1 + H6N5E1 + H5N5L1E1 + H6N5L1E1 + H6N5L2E1) + 2/3 * (H5N5E2 + H6N5E2 + H6N5L1E2 + H6N5L2E2) + 3/3 * (0)) / (1 * (H3N5 + H4N5 + H5N5 + H4N5E1 + H6N5 + H5N5E1 + H6N5E1 + H5N5L1E1 + H5N5E2 + H6N5L2 + H6N5L1E1 +
H6N5E2 + H6N5L3 + H6N5L2E1 + H6N5L1E2 + H6N5L2E2)).
EXECUTE.
COMPUTE A4F0E = (1/4 * (H6N6E1 + H7N6E1 + H7N6L1E1 + H7N6L3E1) + 2/4 * (H6N6E2 + H7N6E2 + H7N6L1E2 + H7N6L2E2) + 3/4 * (H7N6E3 + H7N6L1E3) + 4/4 * (0)) / (1 * (H7N6 + H6N6E1 + H7N6E1 + H6N6E2 + H7N6L1E1 + H7N6E2 + H7N6L1E2 + H7N6E3 + H7N6L3E1 +
H7N6L2E2 + H7N6L1E3)).
EXECUTE.
COMPUTE A2FE = (1/2 * (H4N4E1F1 + H5N4E1F1 + H5N4E1F2 + H6N4E1F1 + H5N4L1E1F1 + H5N4E1F3) + 2/2 * (H5N4E2F1 + H5N4L1E2F1)) / (1 * (H3N4F1 + H3N4F2 + H4N4F1 + H4N4F2 + H5N4F1 + H5N4F2 + H4N4E1F1 + H6N4F1 + H5N4L1F1 + H6N4F2 + H5N4E1F1 + H5N4L1F2 +
H5N4F4 + H5N4E1F2 + H6N4E1F1 + H5N4L2F1 + H5N4L1F3 + H5N4L1E1F1 + H5N4E1F3 + H5N4E2F1 + H5N4L1E2F1)).
EXECUTE.
COMPUTE A3FE = (1/3 * (H4N5E1F1 + H5N5E1F1 + H5N5E1F2 + H6N5E1F1 + H5N5E1F3 + H6N5E1F2 + H5N5L1E1F2 + H6N5L1E1F1 + H6N5E1F3 + H6N5E1F4 + H6N5L2E1F1 + H6N5L1E1F3) + 2/3 * (H5N5E2F2 + H6N5L1E2F1 + H6N5L2E2F1) + 3/3 * (H6N5E3F2 + H6N5E3F3 + H6N5L2E3F1))
/ (1 * (H3N5F1 + H3N5F2 + H4N5F1 + H4N5F2 + H5N5F1 + H4N5L1F1 + H4N5F3 + H5N5F2 + H4N5E1F1 + H6N5F1 + H5N5F3 + H6N5F2 + H5N5E1F1 + H5N5F4 + H6N5F3 + H5N5E1F2 + H6N5E1F1 + H5N5L1F3 + H6N5L1F2 + H6N5F4 + H5N5E1F3 + H6N5E1F2 + H9N5F1 + H5N5L2F2 +
H6N5L1F3 + H5N5L1E1F2 + H6N5L1E1F1 + H6N5E1F3 + H5N5E2F2 + H6N5L1F4 + H6N5E1F4 + H6N5L3F1 + H6N5L2E1F1 + H6N5L1E1F3 + H6N5L1E2F1 + H5N5L3F3 + H6N5E3F2 + H6N5L2E2F1 + H6N5E3F3 + H6N5L2E3F1)).
EXECUTE.
COMPUTE A4FE = (1/4 * (H4N6E1F1 + H5N6E1F1 + H6N6E1F1 + H6N6E1F2 + H7N6E1F1 + H6N6E1F3 + H7N6E1F2 + H6N6E1F4 + H7N6E1F3 + H6N6L1E1F3 + H7N6E1F4 + H7N6L2E1F1) + 2/4 * (H6N6E2F2 + H7N6L1E2F1 + H7N6L2E2F1) + 3/4 * (H7N6E3F1) + 4/4 * (0)) / (1 * (H3N6F1 +
H3N6F2 + H4N6F1 + H3N6F3 + H4N6F2 + H5N6F1 + H5N6F2 + H4N6E1F1 + H6N6F1 + H5N6F3 + H6N6F2 + H5N6E1F1 + H7N6F1 + H6N6L1F1 + H5N6F4 + H6N6F3 + H7N6F2 + H6N6E1F1 + H7N6L1F1 + H6N6F4 + H7N6F3 + H6N6E1F2 + H7N6E1F1 + H7N6L1F2 + H7N6F4 + H6N6E1F3 + H7N6E1F2
+ H6N6E1F4 + H7N6E1F3 + H6N6E2F2 + H7N6L2F2 + H6N6L1E1F3 + H7N6E1F4 + H7N6L2E1F1 + H7N6L1E2F1 + H7N6E3F1 + H7N6L3F2 + H7N6L4F1 + H7N6L2E2F1)).
EXECUTE.
COMPUTE AG = (A2 * (A2G) + A3 * (A3G) + A4 * (A4G)) / (1 * (A2 + A3 + A4)).
EXECUTE.
COMPUTE AS = (A2 * (A2S) + A3 * (A3S) + A4 * (A4S)) / (1 * (A2 + A3 + A4)).
EXECUTE.
COMPUTE AL = (A2 * (A2L) + A3 * (A3L) + A4 * (A4L)) / (1 * (A2 + A3 + A4)).
EXECUTE.
COMPUTE AE = (A2 * (A2E) + A3 * (A3E) + A4 * (A4E)) / (1 * (A2 + A3 + A4)).
EXECUTE.
COMPUTE GS = (A2 * (A2GS) + A3 * (A3GS) + A4 * (A4GS)) / (1 * (A2 + A3 + A4)).
EXECUTE.
COMPUTE GE = (A2 * (A2GE) + A3 * (A3GE) + A4 * (A4GE)) / (1 * (A2 + A3 + A4)).
EXECUTE.
COMPUTE HequN = (1 * ( H4N4F1 +H4N4F2 + H4N4E1F1 + H5N5F1 + H5N5F2 + H5N5E1 + H5N5F3 + H5N5E1F1 + H6N6F1 + H5N5E1F2 + H6N6F2 + H6N6L1F1 + H6N6F3 + H7N7F1 + H6N6F4 + H7N7F2 + H8N8 +
H7N7F3 + H8N8F1 + H7N7F4 + H8N8F2 + H9N9 + H8N8F3 + H9N9F1 + H8N8F4 + H10N10F2 )) / (1 * (H5N2 + H6N2 + H4N3F1 + H3N4F1 + H7N2 + H5N3F1 + H6N3 + H4N4F1 +
H5N4 + H3N5F1 + H8N2 + H5N3F2 + H6N3F1 + H5N3E1 + H4N4F2 + H5N4F1 + H6N4 + H4N5F1 + H3N6F1 + H9N2 + H6N3F2 + H5N4L1 + H6N3E1 + H5N4F2 + H4N4E1F1 + H6N4F1 + H5N4E1 + H4N5F2 + H5N5F1 + H6N5 + H3N6F2 + H4N6F1 + H10N2 + H5N4L1F1 + H6N4F2 + H5N4E1F1 +
H4N5F3 + H5N5F2 + H6N5F1 + H5N5E1 + H5N6F1 + H5N4L1F2 + H5N4F4 + H5N4L1E1 + H5N4E1F2 + H5N4E2 + H5N5F3 + H6N5F2 + H5N5E1F1 + H6N5E1 + H5N4L2F1 + H5N6F2 + H6N6F1 + H7N6 + H5N4L1E1F1 + H5N4E2F1 + H6N5L1F1 + H6N5F3 + H5N5E1F2 + H6N5E1F1 + H5N6F3
+ H6N6F2 + H7N6F1 + H6N5L2 + H6N7F1 + H6N5L1F2 + H5N4E2F2 + H6N5F4 + H6N5L1E1 + H6N6L1F1 + H7N6L1 + H6N6F3 + H7N6F2 + H7N6E1 + H6N5L2F1 + H5N4L1E2F1 + H6N7F2 + H7N7F1 + H8N7 + H6N5L1E1F1 + H7N6L1F1 + H6N6F4 + H7N6F3 + H7N6E1F1 + H7N7F2 + H6N5L2E1 +
H8N7F1 + H6N5L1E2 + H8N8 + H7N6F4 + H6N5E3 + H6N5L3F1 + H7N6E2 + H7N7F3 + H6N5L2E1F1 + H8N7F2 + H8N7E1 + H6N5L1E2F1 + H8N8F1 + H9N8 + H8N9 + H7N7F4 + H8N7F3 + H6N5L2E2 + H8N8F2 + H9N8F1 + H9N9 + H8N7F4 + H7N6E3 + H6N5L2E2F1 + H9N8L1 + H8N8F3 +
H7N6L2E1F1 + H9N8F2 + H9N8E1 + H8N7L2F1 + H7N6L1E2F1 + H9N9F1 + H10N9 + H7N6L3E1 + H8N8F4 + H9N8F3 + H8N7L3 + H7N6L2E2 + H8N7L2E1 + H7N6L4F1 + H6N5L2E3F1 + H7N6L2E2F1 + H10N9F2 + H11N10 + H9N8F5 + H10N9F3 + H10N10F2 + H9N8L2E1)).
EXECUTE.
COMPUTE NgreatH = (1 * (H3N4F1 + H3N5F1 + H4N5F1 + H3N6F1 + H4N5F2 + H3N6F2 + H4N6F1 + H4N5F3 + H5N6F1 + H5N6F2 + H5N6F3 + H6N7F1 + H6N7F2)) / (1 * (H5N2 + H6N2 + H4N3F1 + H3N4F1 + H7N2 + H5N3F1 + H6N3 + H4N4F1 +
H5N4 + H3N5F1 + H8N2 + H5N3F2 + H6N3F1 + H5N3E1 + H4N4F2 + H5N4F1 + H6N4 + H4N5F1 + H3N6F1 + H9N2 + H6N3F2 + H5N4L1 + H6N3E1 + H5N4F2 + H4N4E1F1 + H6N4F1 + H5N4E1 + H4N5F2 + H5N5F1 + H6N5 + H3N6F2 + H4N6F1 + H10N2 + H5N4L1F1 + H6N4F2 + H5N4E1F1 +
H4N5F3 + H5N5F2 + H6N5F1 + H5N5E1 + H5N6F1 + H5N4L1F2 + H5N4F4 + H5N4L1E1 + H5N4E1F2 + H5N4E2 + H5N5F3 + H6N5F2 + H5N5E1F1 + H6N5E1 + H5N4L2F1 + H5N6F2 + H6N6F1 + H7N6 + H5N4L1E1F1 + H5N4E2F1 + H6N5L1F1 + H6N5F3 + H5N5E1F2 + H6N5E1F1 + H5N6F3
+ H6N6F2 + H7N6F1 + H6N5L2 + H6N7F1 + H6N5L1F2 + H5N4E2F2 + H6N5F4 + H6N5L1E1 + H6N6L1F1 + H7N6L1 + H6N6F3 + H7N6F2 + H7N6E1 + H6N5L2F1 + H5N4L1E2F1 + H6N7F2 + H7N7F1 + H8N7 + H6N5L1E1F1 + H7N6L1F1 + H6N6F4 + H7N6F3 + H7N6E1F1 + H7N7F2 + H6N5L2E1 +
H8N7F1 + H6N5L1E2 + H8N8 + H7N6F4 + H6N5E3 + H6N5L3F1 + H7N6E2 + H7N7F3 + H6N5L2E1F1 + H8N7F2 + H8N7E1 + H6N5L1E2F1 + H8N8F1 + H9N8 + H8N9 + H7N7F4 + H8N7F3 + H6N5L2E2 + H8N8F2 + H9N8F1 + H9N9 + H8N7F4 + H7N6E3 + H6N5L2E2F1 + H9N8L1 + H8N8F3 +
H7N6L2E1F1 + H9N8F2 + H9N8E1 + H8N7L2F1 + H7N6L1E2F1 + H9N9F1 + H10N9 + H7N6L3E1 + H8N8F4 + H9N8F3 + H8N7L3 + H7N6L2E2 + H8N7L2E1 + H7N6L4F1 + H6N5L2E3F1 + H7N6L2E2F1 + H10N9F2 + H11N10 + H9N8F5 + H10N9F3 + H10N10F2 + H9N8L2E1)).
EXECUTE.

## Sheet: S5_Gene expression
Supplemental Table S5A: Glycosyltransferase gene expression. Absolute values for glycosyltransferase genes involved in N-glycan biosynthesis or elongation of various glycan classes extracted from gene expression microarray including calulcation of average expression (AVG) of CDX1 high vs. CDX1 low expressing cells and fold changes. An increase (green) or decrease (red) in gene expression for CDX1…
Gene Symbol:	B3GALNT2	B3GALT1	B3GALT2	B3GNT2	B3GNT3	B3GNT8	B4GALNT2	B4GALNT3	B4GALNT4	ABO blood group transferase A	B4GALT1	B4GALT2	B4GALT3	B4GALT4	B4GALT5	FUT1	FUT2	FUT3	FUT4	FUT5	FUT6	FUT7	FUT8	FUT9	MGAT1	MGAT2	MGAT3	MGAT4A	MGAT4B	MGAT5	ST3GAL3	ST3GAL4	ST3GAL6	ST6GAL1
GP2D	135.791	23.2387	19.4352	195.104	388.403	50.811	45.9333	80.2239	32.5694	56.8063	94.3682	288.853	88.7924	370.505	1525.75	131.854	152.627	354.806	758.923	56.403	100.583	43.3012	134.934	18.7595	577.129	270.536	49.672	188.667	1555.47	46.7052	46.2995	80.7377	21.4242	68.542
HCA46	102.833	30.3555	22.2551	115.223	522.211	109.627	45.0883	84.2295	21.7599	66.7946	86.9147	262.374	97.683	163.032	1198.1	149.144	216.234	205.681	828.605	49.1507	84.4754	58.6704	313.317	20.6075	408.298	246.252	52.6153	70.8867	2015.12	33.2684	43.3563	33.6715	25.8368	46.1352
HCC56	98.4864	23.6095	25.8809	178.814	559.103	93.5684	34.1019	92.9762	36.5163	75.1463	88.8885	181.847	110.308	245.73	1198.47	148.516	662.717	703.909	633.576	65.8618	266.264	48.4897	322.052	22.3641	424.182	313.727	55.6755	112.884	2761.53	55.9548	47.4415	50.4062	25.1149	161.773
LIM1863	86.6958	24.3315	36.6003	198.305	428.363	76.2481	31.876	86.1127	21.6473	74.2089	91.9875	285.176	105.167	332.276	1116.18	107.167	245.711	508.157	465.882	55.5175	163.006	54.2919	606.513	21.0129	295.573	268.776	72.2625	117.897	2538.48	46.7563	48.1351	36.0163	20.0001	36.9248
SW403	90.6348	24.5872	67.4312	132.163	477.693	87.9597	34.9866	67.156	33.2362	87.577	87.1949	284.359	105.417	243.856	368.989	124.373	258.091	523.282	293.634	64.8008	215.41	43.745	218.253	19.0261	354.188	227.908	81.8511	110.585	2679.5	35.4433	48.4239	34.7659	22.1602	235.61
PCJW	98.3834	25.7032	24.164	172.597	452.05	52.5868	32.2058	104.966	23.1933	57.3376	154.975	236.555	114.929	257.716	1363.69	130.304	308.974	589.869	924.154	57.0364	141.104	47.3778	731.546	19.1642	368.528	310.336	88.4859	61.6229	2277.6	49.0894	47.5822	119.43	24.2477	78.0397
RCM1	78.4014	27.3448	22.8017	201.211	338.211	37.2883	36.6739	94.5828	22.0252	66.228	93.227	168.882	101.939	162.805	2524.71	814.85	186.403	322.356	770.571	62.4721	117.622	49.5041	383.894	20.449	279.307	233.726	92.9772	81.4908	2260.93	45.6825	49.5507	48.8098	25.4858	95.0824
LS174T	106.964	25.3267	21.4985	168.625	367.581	55.4194	34.5016	60.5271	36.8401	63.0725	85.507	284.821	97.1761	179.758	823.192	114.028	244.997	743.397	460.494	60.2463	208.547	49.8391	438.021	18.8662	345.933	415.419	47.921	122.028	1323.7	42.0951	47.0784	56.1368	28.2233	33.1612
HCT116	113.179	30.2771	19.9793	148.289	149.17	27.5427	37.4951	65.7154	28.6932	47.4449	89.284	326.401	108.856	150.612	1777.52	135.512	83.6971	51.0973	152.638	57.4311	59.5938	43.6359	266.126	18.6631	305.543	306.763	49.6599	42.7971	946.252	41.083	45.0783	45.399	76.4046	82.0289
CC20	69.1785	24.8205	20.3041	149.329	84.4508	27.7789	34.1532	58.7608	28.6889	57.4721	76.9023	226.504	85.5808	237.896	870.72	54.6815	58.3664	40.1705	126.677	56.3061	59.8452	44.5891	176.703	18.3546	517.843	326.937	47.813	25.5959	3550.98	40.1999	60.8114	43.3222	31.823	68.9466
OXCO1	86.7036	26.6907	23.3764	99.4144	79.4728	26.8874	31.2694	61.7564	21.0299	58.314	83.5771	237.261	83.5521	174.265	2933.89	80.8642	43.8055	36.788	128.603	65.766	48.879	43.3924	603.467	23.0329	420.846	354.862	45.2837	28.2426	1144.14	41.0469	65.6883	44.112	52.6381	66.1031
CAR1	104.373	25.5259	21.792	129.724	338.664	26.8435	37.8922	60.9983	32.4827	51.9643	125.402	367.645	110.611	275.24	796.45	175.241	120.642	167.343	182.944	49.0279	71.167	36.4306	461.811	19.6545	848.229	332.428	48.0868	94.3544	1899.96	41.9797	49.6684	224.17	28.4453	33.6217
VACO429	84.7266	24.7335	20.2981	209.952	268.14	34.0063	31.449	53.3219	22.4346	70.2419	86.2855	206.088	112.815	214.869	1103.98	69.3195	121.678	291.582	834.226	57.0842	104.508	40.9369	489.31	19.0392	729.827	462.327	41.4632	35.3869	1039.35	35.3576	45.4961	48.8262	24.6507	39.7482
ISCEROL	104.254	27.7525	28.3897	225.103	148.476	32.2794	33.9686	57.2165	33.3906	57.5343	93.2637	211.775	102.851	340.284	1830.54	136.409	37.6709	20.5126	247.651	54.4175	42.2662	47.8708	538.561	19.8818	361.011	399.174	58.5854	46.8478	1657.05	114.392	49.6242	55.9926	27.1886	90.0872
COLO678	112.003	27.9391	23.61	218.687	326.496	27.9437	28.0594	63.3566	41.2434	69.4595	167.333	235.74	110.813	246.463	2458.22	125.927	35.6551	30.4249	315.685	47.8876	43.8502	43.5657	391.658	19.7431	350.575	303.051	45.2368	52.6401	1293.31	45.5323	50.8859	104.328	48.5088	29.2031
HDC8	87.8329	25.7291	21.2309	207.179	170.872	28.9723	40.1053	66.966	26.6929	59.8218	79.3151	204.029	85.7821	204.128	1099.65	626.027	120.727	49.4752	249.682	53.7212	49.8378	46.8238	1606.1	18.0257	317.143	532.503	49.8584	19.0216	1376.98	42.5203	53.3592	55.1896	45.025	85.7012
AVG CDX1-high	99.7736	25.5621	30.0084	170.255	441.702	70.4386	36.9209	83.8467	28.4735	68.3964	97.8828	249.108	102.676	244.46	1264.88	215.029	284.469	493.932	641.98	58.9361	162.127	49.4024	393.566	20.0312	381.642	285.835	67.6825	108.257	2176.54	44.3744	47.2335	57.4968	24.0616	94.4085
AVG CDX-low	95.2812	26.6836	22.3726	173.46	195.718	29.0318	34.299	61.0115	29.332	59.0316	100.17	251.93	100.108	230.47	1608.87	175.498	77.7803	85.9243	279.763	55.2052	59.9934	43.4057	566.718	19.5494	481.377	377.256	48.2484	43.1108	1613.5	50.2639	52.5765	77.6675	41.8355	61.93
Fold change CDX1-high vs.CDX1-low	1.04715	0.957973	1.3413	0.981525	2.25683	2.42626	1.07644	1.37428	0.97073	1.15864	0.977163	0.988798	1.02566	1.0607	0.786193	1.22525	3.65735	5.74846	2.29473	1.06758	2.70241	1.13816	0.694466	1.02465	0.792814	0.757669	1.40279	2.51115	1.34896	0.882827	0.898377	0.740294	0.575148	1.52444
p-value (t.test)	0.592062	0.308517	0.204807	0.875852	8.74113e-05	0.000393696	0.295832	0.000830972	0.801364	0.0591254	0.870049	0.920104	0.641452	0.690033	0.346005	0.720403	0.00318971	8.28591e-05	0.00627888	0.199478	0.000676643	0.0165643	0.329283	0.512159	0.228733	0.0244759	0.0121925	0.00135357	0.130357	0.548336	0.0625422	0.422539	0.0133264	0.238661
p-value (t.test, Bonferroni)	1	1	1	1	0.00297199	0.0133857	1	0.028253	1	1	1	1	1	1	1	1	0.10845	0.00281721	1	1	0.0230059	1	1	1	1	0.832181	0.414544	0.0460215	1	1	1	1	0.453099	1
Supplemental Table S5B: Expression of other glycosylation-related genes. Absolute values extracted from gene expression microarray data for the individual cell lines analysed including caluclations of average expression (AVG) in CDX1 high vs. CDX1 low expressing cells and fold change. An increase (green) or decrease (red) in gene expression for CDX1 high expressing cell lines is indicated. CDX1 h…
Gene Symbol:	HNF1A	HNF1B	HNF4A	HNF4G	GMDS	LGALS1	LGALS3	LGALS4
GP2D	79.0764	134.491	81.1794	42.3795	370.308	657.752	181.922	9833.57
HCA46	193.284	294.454	98.0086	71.6463	1218.51	535.48	88.1953	9085.18
HCC56	110.104	182.948	80.6945	99.7016	1315.78	114.442	44.7008	9920.52
LIM1863	107.183	126.035	149.563	262.819	665.027	52.3214	87.7958	10522.6
SW403	128.721	202.062	65.4745	303.138	555.753	23.2532	248.705	6097.07
PCJW	98.7501	155.878	74.5561	68.4591	430.151	183.713	135.649	6223.02
RCM1	113.221	123.328	102.861	79.6827	392.952	163.001	106.687	5477.11
LS174T	103.009	123.8	94.9601	147.977	1030.34	70.2161	73.9583	7947.58
HCT116	54.078	111.322	46.0051	46.5342	211.571	2975.26	76.6684	71.5381
CC20	58.8679	287.057	37.3058	24.234	119.321	10282.5	75.3377	71.8731
OXCO1	45.1277	71.522	44.1694	55.5265	187.562	3546.55	105.369	73.5886
CAR1	36.7376	169.249	36.5733	37.4026	191.609	2907.57	65.3312	53.3257
VACO429	46.3668	117.261	54.0307	44.2959	155.094	571.429	77.5782	2418.67
ISCEROL	44.2373	65.5237	47.5441	34.514	276.741	804.657	14.6864	33.6315
COLO678	44.6354	81.7533	38.8166	55.2869	197.663	89.717	26.8694	42.3468
HDC8	37.9678	64.3588	39.4132	36.4196	267.525	2313.72	24.2622	36.3021
AVG CDX1-high	116.669	167.875	93.4123	134.475	747.352	225.022	120.952	8138.33
AVG CDX-low	46.0023	121.006	42.9823	41.7767	200.886	2936.42	58.2628	350.16
Fold change CDX1-high vs. CDX1-low	2.53615	1.38733	2.17327	3.21891	3.72028	0.0766315	2.07596	23.2418
p-value (t.test)	5.0535e-05	0.189372	0.000101887	0.0178828	0.00137203	0.0327609	0.0304211	7.06992e-08
p-value (t.test, Bonferroni)	0.00171819	1	0.00346415	0.608014	0.0466491	1	1	2.40377e-06

## Sheet: S6_Correlations
Supplemental Table S6: Linear regression analysis. Linear regression analysis between mass spectrometric N-glycan traits (Supplemental Table S3) and glycosyltransferase gene expression (Supplemental Table S5) was performed in GraphPad Prism Version 6. CFa = multi/antenna-fucosylation in complex type N-glycans; N≥H = n(N-acetylhexosamine) ≥ n(hexoses); CS = sialylation in complex type N-glycans; n…
Antenna-fucosylation	R square	Sy.x	F	P (two-tailed)	Significant?	Equation	Enzyme action
CFa vs. FUT1	0.1204	0.9713	1.916	0.188	ns	Y = 0.02631*X + 6.033	α1,2-FUT
CFa vs. FUT2	0.4512	0.9179	11.51	0.0044	**	Y = 0.06093*X + 4.410	α1,2-FUT
CFa vs. FUT3	0.4918	1.354	13.55	0.0025	**	Y = 0.09753*X + 3.098	α(1,3/1,4)-FUT
CFa vs. FUT4	0.5272	0.7277	15.61	0.0014	**	Y = 0.05626*X + 6.092	α1,3-FUT
CFa vs. FUT5	0.008171	0.149	0.1153	0.7392	ns	Y = 0.0009900*X + 5.785	α1,3-FUT
CFa vs. FUT6	0.4613	0.6632	11.99	0.0038	**	Y = 0.04493*X + 4.590	α1,3-FUT
CFa vs. FUT7	0.3038	0.1397	6.111	0.0269	*	Y = 0.006757*X + 5.234	α1,3-FUT
CFa vs. FUT9	0.03434	0.1012	0.4979	0.492	ns	Y = 0.001397*X + 4.243	α1,3-FUT
Terminal HexNAc
N≥H vs. B3GNT2	0.01831	0.364	0.2611	0.6173	ns	Y = 0.002959*X + 7.274	Type 1 chain poly-LacNAc
N≥H vs. B3GNT3	0.5554	0.6244	17.49	0.0009	***	Y = 0.04155*X + 6.516	Type 1 chain poly-LacNAc
N≥H vs. B3GNT8	0.4842	0.5382	13.14	0.0028	**	Y = 0.03105*X + 4.274	Type 1 chain poly-LacNAc
N≥H vs. B4GALNT2	0.01732	0.1948	0.2467	0.6271	ns	Y = 0.001540*X + 5.084	SdA-antigen
N≥H vs. B4GALNT3	0.7297	0.1612	37.8	< 0.0001	***	Y = 0.01578*X + 5.549	LacdiNAc
N≥H vs. B4GALNT4	0.1138	0.3158	1.797	0.2014	ns	Y = -0.006737*X + 5.075	LacdiNAc
N≥H vs. MGAT3	0.6446	0.2272	25.39	0.0002	***	Y = 0.01822*X + 5.117	bisecting GlcNAc
Antennarity/HexNAc≥7
HexNAc≥7 vs. B3GNT2	0.1254	0.3436	2.008	0.1783	ns	Y = 0.01856*X + 6.950	Type 1 chain poly-LacNAc
HexNAc≥7 vs. B3GNT3	0.2502	0.8108	4.672	0.0485	*	Y = 0.06683*X + 6.523	Type 1 chain poly-LacNAc
HexNAc≥7 vs. B3GNT8	0.09365	0.7134	1.447	0.249	ns	Y = 0.03272*X + 4.684	Type 1 chain poly-LacNAc
HexNAc≥7 vs. MGAT4A	0.2959	0.82	5.884	0.0294	*	Y = 0.07586*X + 4.188	1,3 arm for tri- and tetra-antennary
HexNAc≥7 vs. MGAT4B	0.0006262	0.5799	0.008772	0.9267	ns	Y = -0.002071*X + 10.84	1,3 arm for tri- and tetra-antennary
HexNAc≥7 vs. MGAT5	0.01671	0.4148	0.2379	0.6333	ns	Y = -0.007716*X + 5.680	1,6 arm for tri- and tetra-antennary
Sialylation
CS vs. ST3GAL2	0.001332	0.3534	0.01868	0.8932	ns	Y = -0.001356*X + 6.058	α2,3-sialylation
CS vs. ST3GAL3	0.4763	0.1164	12.73	0.0031	**	Y = 0.01166*X + 5.300	α2,3-sialylation
CS vs. ST3GAL4	7.831e-05	0.7605	0.001096	0.9741	ns	Y = -0.0007071*X + 5.882	α2,3-sialylation
CS vs. ST3GAL6	0.3525	0.4533	7.622	0.0153	*	Y = 0.03514*X + 3.929	α2,3-sialylation
CS vs. ST6GAL1	0.009675	0.8679	0.1368	0.717	ns	Y = 0.009012*X + 5.783	α2,6-sialylation

## Sheet: processed raw data
Intensity values per sample per glycan: the corrected relative area with subtraction of background area after pre-prossesing is given. Only samples and compositions which have passed quality criteria are included (see manuscript for further information on data prosessing).
							Calibrated	H5N2	H6N2	H4N3F1	H3N4F1	H7N2	H5N3F1	H6N3	H4N4F1	H5N4	H3N5F1	H8N2	H5N3F2	H6N3F1	H5N3E1	H4N4F2	H5N4F1	H6N4	H4N5F1	H3N6F1	H9N2	H6N3F2	H5N4L1	H6N3E1	H5N4F2	H4N4E1F1	H6N4F1	H5N4E1	H4N5F2	H5N5F1	H6N5	H3N6F2	H4N6F1	H10N2	H5N4L1F1	H6N4F2	H5N4E1F1	H4N5F3	H5N5F2	H6N5F1	H5N5E1	H5N6F1	H5N4L1F2
							[M+Na	1257.42	1419.48	1444.51	1485.53	1581.53	1606.56	1622.55	1647.59	1663.58	1688.61	1743.58	1752.62	1768.61	1779.63	1793.64	1809.64	1825.63	1850.67	1891.69	1905.63	1914.67	1936.67	1941.68	1955.7	1966.71	1971.69	1982.71	1996.72	2012.72	2028.71	2037.75	2053.75	2067.69	2082.72	2117.75	2128.77	2142.78	2158.78	2174.77	2185.79	2215.8	2228.78
Name	Sample	Cell Line	Techn. Repl.	Well	MALDIspot	CDX1	Fraction of Distribution	0.954973	0.984911	0.984198	0.983056	0.979887	0.979	0.978564	0.977629	0.977178	0.976195	0.974016	0.97343	0.972945	0.97253	0.971836	0.971336	0.970833	0.969661	0.96792	0.967283	0.966556	0.965821	0.965518	0.964718	0.964196	0.964169	0.963641	0.962813	0.96225	0.961684	0.960839	0.960261	0.959687	0.958539	0.956728	0.956112	0.955183	0.954575	0.953965	0.953318	0.95173	0.95048
1_0_J11_1	8A	CAR1	1	B6	J11	Low	1	1.17945	5.26495	0.210259	0.495816	6.99445	0.332451	0.37021	0.25458	0.193836	0.705999	14.4512	0.194908	0.396003	0.0660454	0.143176	0.899061	0.0403041	0.276456	0.375399	8.93941	0.235401	0.596862	0.268518	0.572171	0.239015	0.0514872	0.243115	0.157957	0.283644	0.256603	2.38719	0.137921	1.48754	1.00252	0.0725038	0.458905	0.0546845	0.190521	0.56533	0.197799	0.0444668	0.846372
1_0_J13_1	8B	CAR1	1	B7	J13	Low	1	3.14812	12.7847	0.383361	0.67785	15.0498	0.580801	0.431613	0.501315	0.255582	0.515205	23.8379	0.227949	0.428382	0.0952643	0.315654	0.89861	0.164572	0.271958	0.243321	9.00656	0.187836	0.584661	0.268472	0.648417	0.214811	0.0179606	0.291352	0.395459	0.308866	0.151946	0.552664	0.0101294	0.938744	0.589164	0.0755145	0.414171	0.135023	0.206134	0.666636	0.135988	0.168762	0.696159
1_0_J21_1	10A	CC20	1	B11	J21	Low	1	0.906691	4.08912	0.171885	0.321952	6.90692	0.332152	0.217097	0.240522	0.373022	0.383038	12.9085	0.187204	0.156014	0.0682867	0.180495	1.31541	0.109498	0.166022	0.0445157	10.7296	0.0637609	0.802728	0.378288	0.245356	0.153788	0.0566574	0.744028	0.0952249	0.150031	0.638458	1.75625	0.114205	0.809789	1.74901	0.116557	2.15361	0.243069	0.183112	1.05114	0.110558	0.0295293	0.319182
1_0_J23_1	10B	CC20	1	B12	J23	Low	1	0.630159	3.33322	0.251301	0.163626	4.62344	0.320867	0.109738	0.154743	0.410779	0.36113	10.4942	0.0533474	0.114502	0.14158	0.175798	1.0851	0.059089	0.264752	0.124307	8.85021	0.0926035	0.851673	0.163319	0.207162	0.186429	0.0812382	0.504682	0.13965	0.180517	0.595867	3.32925	0.0563214	0.959671	1.94015	0.101152	1.92775	0.0961166	0.158208	0.983794	0.102554	0.0189581	0.391753
1_0_K15_1	13B	COLO678	1	C8	K15	Low	1	3.5717	6.4758	0.614309	0.226996	8.26888	0.246275	0.207468	0.31444	0.206695	0.337084	9.00131	0.361411	0.31317	0.113259	0.395855	2.10195	0.0943357	0.329527	0.228747	9.49319	0.227272	0.952585	0.279843	1.94442	0.115342	0.0889414	0.22613	0.167233	0.622755	0.197949	1.48094	0.107982	0.547639	2.01537	0.180972	0.157788	0.242185	1.16744	1.35125	0.0274498	0.159574	1.61372
1_0_L5_1	17A	GP2D	1	D3	L5	High	1	3.31211	4.52179	0.802347	1.64423	6.32252	0.718254	0.268149	1.0519	0.34315	2.83304	13.6332	0.337672	0.714208	0.0690639	0.736816	1.75734	0.0971982	1.85535	2.55217	14.0736	0.18346	0.390454	0.22052	1.26613	0.393323	0.181443	0.25103	1.1401	1.84612	0.160161	0.812525	1.37296	0.723322	0.0945561	0.154897	0.785183	0.56527	1.23672	1.10044	0.141672	1.21263	0.173576
1_0_L7_1	17B	GP2D	1	D4	L7	High	1	2.55097	3.96756	0.564275	0.837295	5.58127	0.551698	0.256755	0.679163	0.304634	1.55724	12.4314	0.376896	0.743281	0.0829906	0.512787	1.69059	0.18103	1.40964	1.47707	14.9402	0.20341	0.25704	0.251805	1.37861	0.274701	0.237346	0.133513	1.07404	1.97693	0.195414	0.439347	0.833219	0.701358	0.0851431	0.176208	0.793912	0.745058	1.48416	1.21603	0.246671	0.924533	0.161363
1_0_L11_1	18A	HCA46	1	D6	L11	High	1	2.94641	4.01927	0.749903	1.39954	5.36762	0.576042	0.215751	0.955608	0.279775	2.37885	11.4561	0.321545	0.643104	0.0763765	0.651744	1.70684	0.128312	1.73806	2.29196	12.6015	0.202695	0.273446	0.265218	1.19391	0.301022	0.218065	0.203791	1.12349	2.01212	0.175639	0.683606	1.376	0.725298	0.109561	0.134254	0.822026	0.599151	1.39483	1.25677	0.268465	1.32804	0.129168
1_0_L13_1	18B	HCA46	1	D7	L13	High	1	3.23809	4.84967	0.679797	0.983701	6.3077	0.599799	0.309995	0.70765	0.309191	1.54437	12.4121	0.386855	0.683036	0.101431	0.452593	1.59319	0.144191	1.35598	1.38549	14.2122	0.205763	0.242475	0.277077	1.26597	0.260928	0.200997	0.17151	1.03921	1.80933	0.148004	0.340181	0.731307	0.65336	0.0671989	0.137955	0.760386	0.716795	1.51758	1.08025	0.299945	0.927022	0.106852
1_0_L21_1	20A	HCC56	1	D11	L21	High	1	2.16429	7.11594	0.265985	0.0875916	11.3326	0.354789	0.0900854	0.185795	0.157908	0.270554	17.0701	0.1253	0.541585	0.240226	0.153625	0.438707	0.227679	0.286036	0.202209	14.312	0.063293	2.13784	1.32799	0.486699	0.298065	0.299339	0.249498	0.391542	0.300415	0.121886	0.931666	0.146883	1.01021	0.121238	0.385866	0.839097	0.540975	0.818721	0.191163	0.292902	0.17544	0.238535
1_0_L23_1	20B	HCC56	1	D12	L23	High	1	2.79631	7.26856	0.152034	0.2306	10.9551	0.250828	0.143888	0.228178	0.140826	0.421937	16.5603	0.312801	0.309478	0.319679	0.285505	0.371405	0.131237	0.362417	0.27999	12.3355	0.219833	1.99063	1.31127	0.415521	0.17002	0.137697	0.201629	0.597437	0.432633	0.18483	2.80651	0.117264	0.931666	0.21373	0.392516	0.844232	0.54098	0.619292	0.293026	0.38933	0.300399	0.334603
1_0_I15_1	4A	HCT116	1	A8	I15	Low	1	2.20132	4.28342	0.223454	0.263294	4.39241	0.328096	0.629459	0.236439	1.02145	0.254729	9.96718	0.299836	0.31155	0.626774	0.325861	0.00878514	0.388592	0.270852	0.00448656	12.1567	0.0703176	1.54234	1.16959	0.355311	0.474674	0.0802975	6.12325	0.261505	0.309774	1.30573	2.80613	0.164492	0.650642	0.115874	0.12958	0.0760488	0.156584	0.279598	0.132032	0.371219	0.0492831	0.0931462
1_0_I17_1	4B	HCT116	1	A9	I17	Low	1	2.30801	5.84928	0.0478584	0.271063	5.55929	0.0672274	0.629205	0.240891	1.29353	0.267262	14.0286	0.0746069	0.352134	0.449954	0.176392	0.0748415	0.0375169	0.191226	0.0231956	17.0979	0.0639059	1.29367	0.92378	0.171653	0.330167	0.0811551	5.94382	0.186234	0.121727	1.31922	1.68903	0.0470524	0.979032	0.0965698	0.181225	0.062195	0.113517	0.266376	0.0522699	0.13358	0.0766348	0.130754
1_0_J17_1	9A	HDC8	1	B9	J17	Low	1	5.08642	5.85005	0.426674	0.685862	11.3485	0.27052	0.259517	0.523981	0.61834	0.809311	1.21527	0.358272	0.515391	0.361525	0.478625	1.26492	0.217613	0.433809	1.17676	0.546324	0.243511	0.970965	0.575584	1.07169	0.183076	0.322276	0.406757	0.7115	0.374683	0.535644	0.26899	0.17636	0.0721832	0.796528	0.10488	2.96905	0.626334	0.250634	1.45762	0.24208	0.27934	0.565066
1_0_J19_1	9B	HDC8	1	B10	J19	Low	1	7.76857	9.5287	0.681527	1.16153	16.8213	0.503145	0.176752	0.595996	0.287845	1.36249	1.68208	0.352264	0.306246	0.131504	0.324646	2.15341	0.139933	0.389284	1.28411	0.648425	0.138417	0.695971	0.199544	1.17719	0.385508	0.151534	0.588406	0.831977	0.701382	0.442863	0.357806	0.171446	0.170324	0.596474	0.177087	3.16589	0.702971	0.387629	2.15813	0.293072	0.505418	0.286505
1_0_I9_1	human plasma	human plasma	1	A5	I9	n.a.	1	0.35353	0.460794	0.0344769	0.294622	0.19134	0.0554542	0.0959166	0.975153	0.23049	0.128186	1.34369	0.0639722	0.253163	0.410695	0.0805525	1.00954	0.0563016	0.383471	0.078358	1.53039	0.0305988	0.601594	0.480168	0.0466001	0.263238	0.0168644	7.00356	0.0592573	0.277599	0.128946	1.14376	0.137409	0.199852	0.945639	0.583592	2.38655	0.167559	0.154674	0.0980629	0.563411	0.742831	0.395936
1_0_J15_1	human plasma	human plasma	1	B8	J15	n.a.	1	0.444819	0.67234	0.0341147	0.453469	0.326732	0.0646999	0.0874516	1.60582	0.27304	0.182027	1.67753	0.10866	0.249374	0.4238	0.0456382	1.40667	0.0388626	0.426848	0.0980451	2.18084	0.0449956	0.411336	0.374397	0.0969223	0.330157	0.033637	7.3412	0.108682	0.351687	0.0597654	0.760367	0.0887969	0.211703	0.64055	0.299529	2.37313	0.191737	0.0224874	0.0514725	0.520675	0.568153	0.237576
1_0_K1_1	human plasma	human plasma	1	C1	K1	n.a.	1	0.233847	0.448239	0.0346553	0.361955	0.226921	0.0395016	0.082924	1.49332	0.287829	0.173507	1.57471	0.0824952	0.327113	0.467651	0.067523	1.47416	0.0502437	0.504999	0.0707808	1.75173	0.0223237	0.595252	0.46801	0.0695841	0.343667	0.0133594	7.1964	0.0616806	0.287539	0.0571616	1.26248	0.0776001	0.182048	0.864164	0.644548	2.55724	0.0797052	0.0776635	0.0621946	0.582302	0.743452	0.434279
1_0_K7_1	12A	ISRECO1	1	C4	K7	Low	1	1.71365	3.06363	0.238108	0.201548	6.59883	0.457097	0.352011	0.182178	0.204668	0.336719	18.2603	0.159394	0.601508	0.328536	0.162809	0.746672	0.0420004	0.184105	0.270463	19.1487	0.146189	0.878158	1.33331	0.85171	0.380951	0.0630563	0.609277	0.287484	0.181234	0.215589	2.67839	0.0103386	1.18115	0.338986	0.165965	2.50176	0.191122	0.1827	0.612816	0.0465549	0.125291	0.282988
1_0_K21_1	15A	LIM1863	1	C11	K21	High	1	2.45471	5.73388	0.223709	0.541369	6.33491	0.157322	0.263949	0.510566	0.516738	0.833406	11.053	0.111475	0.581599	0.0414224	0.501959	1.24823	0.52476	1.79261	0.363766	8.21598	0.264903	0.43316	0.252802	0.73928	0.123715	0.722798	0.243474	1.37501	2.02162	0.142931	2.34075	0.182513	0.589685	0.0796342	0.521992	0.204392	1.12739	2.4042	0.309503	0.116961	0.637003	0.106004
1_0_K23_1	15B	LIM1863	1	C12	K23	High	1	2.26663	5.78643	0.203333	0.409241	6.81415	0.336497	0.177019	0.31786	0.556661	0.600338	12.5803	0.107165	0.493832	0.0395552	0.318718	1.28744	0.494231	1.15927	0.196724	9.52848	0.263296	0.543466	0.2135	0.431339	0.116656	0.867301	0.113156	0.890202	1.76773	0.0884222	1.16207	0.117254	0.661226	0.0943498	0.539811	0.0855689	0.945253	2.67712	0.325715	0.278685	0.632951	0.122243
1_0_I1_1	1A	LS174T	1	A1	I1	High	1	2.55443	5.0836	0.44172	0.483927	4.67829	0.629909	0.384349	0.286007	0.170077	0.771486	10.6513	0.776161	0.92571	0.070095	0.381189	1.58303	0.0462727	0.342869	0.394674	14.5455	0.409218	0.967254	0.365277	3.26553	0.194269	0.083158	0.107276	0.601337	0.23823	0.149622	4.11144	0.0182702	1.40284	0.292166	0.399293	0.180967	0.625588	0.219808	0.671785	0.137961	0.128917	0.472213
1_0_I3_1	1B	LS174T	1	A2	I3	High	1	2.70377	4.70057	0.572647	0.337325	4.7524	0.757902	0.270263	0.220828	0.206621	0.554314	10.6048	0.744352	1.19748	0.0465225	0.401771	1.19113	0.0288879	0.159292	0.310107	13.0704	0.703699	1.18715	0.448576	3.20688	0.0935281	0.0430223	0.116621	0.296376	0.185558	0.10902	3.28546	0.0686644	1.10908	0.315883	0.398379	0.158563	0.495652	0.47584	0.666751	0.0443863	0.0372678	0.304165
1_0_J7_1	7A	OXCO1	1	B4	J7	Low	1	0.951496	2.41804	0.601224	0.139975	3.71374	0.283955	0.22749	0.337035	0.454042	0.331937	7.81207	0.257232	0.298067	0.175539	0.520292	2.69904	0.0593297	0.470026	0.0794491	5.19688	0.0296173	1.44642	0.708575	0.897662	0.242433	0.0990382	0.365798	0.192507	0.492817	0.40678	4.66257	0.070122	0.697393	3.9463	0.145523	1.16229	0.247634	0.193434	2.1897	0.0259875	0.35471	0.713946
1_0_J9_1	7B	OXCO1	1	B5	J9	Low	1	0.839795	3.51211	0.416153	0.122896	4.69916	0.352995	0.228813	0.267384	0.201355	0.40085	11.0709	0.227449	0.32315	0.120272	0.292064	2.35263	0.138557	0.409581	0.00899453	9.12471	0.0721988	1.09952	0.392853	0.887068	0.293803	0.0521108	0.230953	0.247629	0.34626	0.385014	4.2836	0.121454	0.982731	3.55084	0.0985345	1.19384	0.0987082	0.194285	1.94007	0.0188047	0.118706	0.91922
1_0_K17_1	14A	PCJW	1	C9	K17	High	1	2.34204	4.69081	0.122966	0.711597	6.07356	0.201754	0.13511	1.90153	0.684634	0.549211	9.76924	0.14071	0.438401	0.162828	0.281348	2.35117	0.525712	1.47906	0.110516	8.01808	0.264143	0.358608	0.34628	0.406285	0.281711	0.8684	1.5917	0.944278	1.65422	0.0448607	0.871872	0.0484187	0.636149	0.288453	0.884348	1.37	0.587438	2.42769	0.174482	0.530468	0.20389	0.183207
1_0_K19_1	14B	PCJW	1	C10	K19	High	1	2.48134	4.9399	0.167359	0.435195	6.9112	0.286731	0.110564	0.72757	0.823329	0.776392	11.2863	0.209717	0.37121	0.119534	0.402496	1.2556	0.510191	2.06457	0.240422	11.2294	0.165174	0.419281	0.323344	0.27697	0.181265	0.468283	0.447541	1.87274	2.1032	0.153064	1.50477	0.232282	0.808601	0.120827	0.349718	0.394939	0.6543	3.44594	0.0902662	0.403942	0.527211	0.100778
1_0_L15_1	19A	RCM1	1	D8	L15	High	1	1.93276	4.88771	0.20637	0.326391	5.67816	0.336602	0.142638	0.455526	0.737373	0.566141	12.2486	0.158995	0.496347	0.0404791	0.33058	1.06673	0.350175	1.30594	0.305726	13.3318	0.294711	0.581732	0.135313	0.494463	0.171401	0.449945	0.0885708	1.60457	1.10045	0.0636489	1.08535	0.236222	1.17833	0.0717656	0.439628	0.0825416	1.08916	1.915	0.273165	0.267418	0.501604	0.117607
1_0_L17_1	19B	RCM1	1	D9	L17	High	1	2.04031	5.00229	0.172381	0.313141	6.01866	0.257358	0.159025	0.52814	0.715815	0.36453	13.8545	0.186101	0.665181	0.0751213	0.435617	1.12272	0.448997	1.17467	0.294208	15.5963	0.198684	0.585882	0.156115	0.464675	0.211799	0.463883	0.128575	1.37088	1.06683	0.0679806	0.437678	0.259694	1.71602	0.0906756	0.437411	0.156193	0.984717	1.75894	0.207264	0.102586	0.530581	0.234001
1_0_L1_1	16A	SW403	1	D1	L1	High	1	2.87442	5.43544	0.177999	0.382278	5.86799	0.601961	0.47095	0.213744	0.184182	0.528659	12.0889	0.804233	1.33273	0.0837203	0.528634	0.582679	0.306332	0.308848	0.338321	11.4988	1.62142	0.853923	0.337007	1.1393	0.0940689	0.125745	0.178414	0.518103	0.35855	0.126868	1.24571	0.0970821	0.939355	0.182104	0.361747	0.221401	0.972266	0.622409	0.45205	0.415382	0.174706	0.181964
1_0_L3_1	16B	SW403	1	D2	L3	High	1	3.49393	8.53607	0.217444	0.395338	9.21234	0.52323	0.506596	0.211139	0.176625	0.494853	17.901	1.0719	1.73009	0.0630733	0.47185	0.473127	0.197964	0.171816	0.652979	17.2135	2.38812	0.607865	0.328004	0.92414	0.161396	0.163427	0.187698	0.319639	0.157929	0.0539823	0.426571	0.0172068	0.976685	0.0915986	0.214614	0.132851	0.77759	0.347737	0.29825	0.224042	0.0852712	0.134008
1_0_K3_1	11A	VACO429	1	C2	K3	Low	1	0.733864	4.61892	0.0997889	0.259265	7.23854	0.280442	0.190235	0.615287	0.671982	0.48427	14.1903	0.10609	0.497996	0.622005	0.203122	0.508309	0.0280644	0.508154	0.0345648	10.6677	0.0284182	2.45358	1.02878	0.207261	0.423163	0.0430343	4.94136	0.224485	0.291048	0.824973	3.76873	0.18922	0.990487	0.143244	0.262534	0.856999	0.102506	0.332431	0.190689	0.261588	0.120216	0.116185
1_0_K5_1	11B	VACO429	1	C3	K5	Low	1	0.760187	4.62477	0.0962735	0.268763	7.02632	0.329821	0.228444	0.0959734	0.633297	0.592406	14.0262	0.153447	0.444826	0.489294	0.282033	0.230267	0.0635619	0.409222	0.1548	10.1096	0.036815	1.77503	0.794821	0.308159	0.370187	0.159054	4.09975	0.425946	0.2754	0.967262	5.86744	0.247067	0.97149	0.105403	0.283248	0.408656	0.0774996	0.364198	0.288429	0.234597	0.0849889	0.222693
2_0_N11_1	8A	CAR1	2	F6	N11	Low	1	1.51391	9.17276	0.230534	0.497524	12.2895	0.566296	0.325512	0.119089	0.159547	0.589397	26.3294	0.278928	0.585879	0.0823218	0.120852	0.845209	0.0373468	0.162879	0.481952	17.3911	0.148289	0.686314	0.220458	0.672372	0.244541	0.0966543	0.346193	0.148552	0.126583	0.203956	0.60637	0.0382705	2.53732	0.706365	0.0411575	0.376671	0.158988	0.211991	0.555506	0.0632666	0.0456985	0.712304
2_0_N21_1	10A	CC20	2	F11	N21	Low	1	1.03628	3.97583	0.259442	0.188485	6.5652	0.280418	0.061322	0.152791	0.517292	0.214536	12.4645	0.0258565	0.124246	0.0593975	0.0454362	1.23712	0.0661359	0.118454	0.128399	10.4159	0.0275058	1.36335	0.181255	0.172511	0.189855	0.0499429	0.730871	0.157047	0.128695	0.536591	1.11355	0.0384328	0.772704	2.18875	0.0659453	2.53402	0.106418	0.135517	1.06979	0.106708	0.0972165	0.26352
2_0_N23_1	10B	CC20	2	F12	N23	Low	1	0.800349	4.8695	0.152779	0.13521	8.40935	0.310776	0.107165	0.121405	0.435691	0.281603	19.7463	0.039102	0.264645	0.0820926	0.0644731	1.60592	0.0298596	0.127681	0.14529	18.2867	0.0188489	0.798429	0.142504	0.161167	0.264843	0.0218726	0.540788	0.0683057	0.126637	0.563347	1.38774	0.0415332	1.53387	1.80967	0.0324744	2.01509	0.118625	0.192977	1.20458	0.0487599	0.0212395	0.306913
2_0_O13_1	13A	COLO678	2	G7	O13	Low	1	5.77608	8.18928	0.518031	0.172641	13.1548	0.489189	0.100614	0.215444	0.178717	0.234397	8.8752	0.392403	0.580216	0.0621086	0.450778	1.81435	0.0519129	0.160199	0.255106	8.6393	0.330234	0.896923	0.246323	3.26662	0.157857	0.0843056	0.387831	0.283904	0.271787	0.185839	0.596447	0.0823128	0.907011	1.83489	0.242335	0.206838	0.565722	1.0401	0.988343	0.117245	0.107025	2.60124
2_0_O15_1	13B	COLO678	2	G8	O15	Low	1	2.98684	5.33172	0.56795	0.181376	7.11736	0.47568	0.292812	0.235191	0.238948	0.189836	8.06098	0.294255	0.311506	0.0475783	0.285429	2.06988	0.1255	0.247867	0.0363331	9.07676	0.144882	1.26194	0.287448	1.89893	0.0984099	0.15593	0.082603	0.34623	0.742694	0.28096	1.30128	0.0739132	0.472068	2.43326	0.179987	0.163507	0.255709	1.25126	1.23495	0.0696191	0.261712	1.97202
2_0_P5_1	17A	GP2D	2	H3	P5	High	1	2.18148	4.74869	0.413181	0.529614	5.29018	0.502562	0.400356	0.239097	0.167272	0.521665	11.3584	0.974221	1.18137	0.092739	0.604554	0.591758	0.0976544	0.299317	0.352171	10.7051	1.51664	1.03766	0.295442	1.31638	0.18595	0.165147	0.250884	0.511809	0.329366	0.0885351	2.55599	0.0788345	0.797449	0.236536	0.332402	0.349509	0.932425	0.615663	0.576112	0.294001	0.199513	0.152413
2_0_P7_1	17B	GP2D	2	H4	P7	High	1	3.2564	6.38453	0.259137	0.568268	7.06305	0.705655	0.483957	0.315727	0.152504	0.842085	13.3261	0.969953	1.64047	0.096547	0.465228	0.609106	0.0642393	0.191907	0.647922	12.4545	2.31481	1.25779	0.362881	0.986764	0.118293	0.176795	0.0580547	0.451453	0.381086	0.121762	1.73532	0.064575	0.774023	0.200115	0.364205	0.164938	0.908571	0.660673	0.287358	0.16993	0.119604	0.211766
2_0_P11_1	18A	HCA46	2	H6	P11	High	1	1.91904	2.82399	0.578723	0.9748	3.89003	0.453859	0.169382	0.866372	0.345387	1.89287	9.43684	0.323913	0.622334	0.141448	0.678472	1.59459	0.217384	1.71867	1.60128	11.0266	0.179515	0.654329	0.313724	1.03867	0.372745	0.295455	0.192402	1.37537	1.70375	0.126205	3.30788	0.956561	0.746463	0.161761	0.26461	0.729002	0.81691	1.68911	0.930549	0.316905	1.08651	0.136322
2_0_P13_1	18B	HCA46	2	H7	P13	High	1	1.56581	3.12251	0.314282	0.39454	4.32935	0.399594	0.176397	0.540918	0.415904	0.787274	10.8931	0.303673	0.660098	0.0634586	0.437832	1.30118	0.31914	1.23668	0.612779	13.6571	0.275102	0.217913	0.202354	0.877014	0.297581	0.409756	0.17982	1.26469	1.49546	0.0940743	1.32128	0.416063	1.18012	0.0977628	0.336515	0.412085	0.956462	1.88291	0.70054	0.215114	0.717842	0.151009
2_0_P21_1	20A	HCC56	2	H11	P21	High	1	1.88868	7.11195	0.306652	0.154705	12.2755	0.377668	0.237025	0.167481	0.111046	0.331637	19.433	0.225657	0.431265	0.269251	0.189993	0.400606	0.170896	0.315694	0.216572	17.0418	0.172425	0.851125	1.06247	0.582342	0.417971	0.2042	0.235272	0.371397	0.411403	0.212682	2.06799	0.0253771	1.13841	0.0698521	0.427871	0.688093	0.626988	0.781543	0.157245	0.347331	0.152709	0.316409
2_0_M15_1	4A	HCT116	2	E8	M15	Low	1	2.88684	4.92051	0.037409	0.0873161	6.39231	0.0782394	0.675041	0.0658284	1.16626	0.041345	15.4419	0.0531742	0.0788443	0.530875	0.0796	0.044472	0.0724238	0.153278	0.0352574	20.7326	0.0558523	1.34705	1.09619	0.0758093	0.347995	0.0320464	6.90759	0.170573	0.0859775	1.36746	1.09809	0.0277075	1.16983	0.0923588	0.295435	0.214295	0.0825811	0.0757115	0.0267793	0.127497	0.0308847	0.147281
2_0_M19_1	4B	HCT116	2	E10	M19	Low	1	2.09912	3.70441	0.331684	0.112224	3.81618	0.431215	0.560963	0.0699685	1.55788	0.530288	8.17157	0.043939	0.0648535	0.367527	0.256909	0.168044	0.162076	0.578009	0.00418821	10.7913	0.0397025	1.32791	0.742778	0.183471	0.372192	0.120044	5.699	0.236886	0.371383	1.28381	5.10753	0.16293	0.875559	0.123437	0.445879	0.176853	0.491378	0.402125	0.11176	0.174911	0.256915	0.100798
2_0_N17_1	9A	HDC8	2	F9	N17	Low	1	7.85653	9.13194	0.430105	0.707487	16.3668	0.380207	0.205868	0.491397	0.32726	1.17138	1.09759	0.113203	0.206913	0.209092	0.314703	1.63386	0.152888	0.487447	1.36028	0.830064	0.0315375	1.39057	0.444796	1.2236	0.357691	0.0761708	0.700437	0.802832	0.571995	0.372395	0.452477	0.184867	0.552366	0.964368	0.189647	3.76094	0.622081	0.387188	1.73907	0.315455	0.31372	0.430688
2_0_N19_1	9B	HDC8	2	F10	N19	Low	1	5.32024	7.26114	0.608338	0.923577	14.9068	0.68505	0.238244	0.677714	0.398891	1.20574	1.36315	0.140251	0.34883	0.19179	0.325298	2.22977	0.108715	0.423907	1.3461	0.541327	0.132966	1.15806	0.347255	1.34699	0.402649	0.139862	0.428757	0.888414	0.711925	0.396755	0.255396	0.275919	0.121566	0.749871	0.116276	3.74809	0.627333	0.388739	2.54369	0.314098	0.457527	0.305359
2_0_N13_1	human plasma	human plasma	2	F7	N13	n.a.	1	0.393042	0.582793	0.018506	0.539741	0.323574	0.0463392	0.092479	2.12339	0.303559	0.234154	2.15891	0.0506839	0.347135	0.479907	0.0302675	1.8975	0.067053	0.574255	0.0858399	2.64952	0.0244809	0.540224	0.412131	0.043409	0.3331	0.0125919	7.8933	0.0734639	0.372605	0.118233	1.13574	0.102084	0.198254	0.688343	0.525227	2.67529	0.101246	0.0891656	0.0556448	0.581675	0.480574	0.310027
2_0_O1_1	human plasma	human plasma	2	G1	O1	n.a.	1	0.196559	0.286857	0.0206355	0.236779	0.166204	0.0446158	0.0579276	0.814947	0.229114	0.124256	1.48029	0.0779268	0.347888	0.416396	0.062153	0.844425	0.0309329	0.318841	0.0675227	1.47207	0.0153412	0.562285	0.385899	0.0589227	0.203116	0.00999122	6.03996	0.0911342	0.269509	0.0607901	1.68259	0.0664471	0.230125	0.74616	0.729096	1.99865	0.0651747	0.106598	0.0471361	0.43201	0.832691	0.449529
2_0_P19_1	human plasma	human plasma	2	H10	P19	n.a.	1	0.293259	0.381389	0.096207	0.282605	0.263846	0.0565754	0.0654004	0.904436	0.24016	0.124072	1.44335	0.0430121	0.249806	0.425778	0.0778084	0.882519	0.0184285	0.311681	0.0763845	1.49374	0.0211449	0.528972	0.399262	0.0630849	0.235966	0.0105196	6.92771	0.0564379	0.25776	0.15179	0.969925	0.117247	0.163227	0.687668	0.460752	1.99707	0.0666325	0.0854119	0.0736833	0.50341	0.487938	0.272153
2_0_O7_1	12A	ISRECO1	2	G4	O7	Low	1	1.95861	3.39373	0.316502	0.275755	7.45304	0.4698	0.420805	0.196411	0.208821	0.432117	20.531	0.14757	0.656587	0.366585	0.133144	0.798419	0.0305294	0.276321	0.233834	21.0552	0.214287	0.626818	1.23007	0.886352	0.319176	0.0746036	0.633381	0.173723	0.235673	0.231656	1.1139	0.0481437	1.37662	0.387142	0.141707	2.50125	0.242499	0.182058	0.577301	0.0983174	0.0479343	0.376946
2_0_O9_1	12B	ISRECO1	2	G5	O9	Low	1	3.35167	4.55145	0.267948	0.711883	8.1315	0.416537	0.267506	0.340043	0.357914	1.68977	19.3823	0.168322	0.49022	0.290728	0.181008	0.690068	0.0736217	0.357038	1.21783	15.1963	0.138581	0.993809	1.014	0.542468	0.425959	0.0647232	0.513113	0.300091	0.24865	0.146385	1.51725	0.188655	1.37195	0.318401	0.202307	2.10023	0.239603	0.168579	0.645753	0.0804288	0.158322	0.294137
2_0_O21_1	15A	LIM1863	2	G11	O21	High	1	2.48543	7.07129	0.248259	0.359946	7.95988	0.308247	0.156833	0.369836	0.665089	0.583066	15.0456	0.25561	0.613589	0.043867	0.357344	1.50701	0.455267	1.7517	0.186273	11.7966	0.278006	0.524558	0.156364	0.40148	0.135346	0.780471	0.112877	1.42042	2.0486	0.0910972	0.802242	0.136743	0.568261	0.139505	0.508904	0.0638223	1.02176	2.57601	0.329225	0.192142	0.630127	0.160377
2_0_O23_1	15B	LIM1863	2	G12	O23	High	1	2.59115	8.22611	0.31324	0.375852	9.54216	0.281763	0.148975	0.357816	0.757624	0.573825	17.5987	0.277505	0.682842	0.0919963	0.254096	1.0397	0.501403	1.21589	0.195338	12.7322	0.182776	0.466648	0.189802	0.391787	0.20147	0.862275	0.243168	0.858603	1.76065	0.0549361	0.788446	0.116477	0.594781	0.141053	0.358431	0.163138	0.685561	2.20925	0.328692	0.234909	0.51552	0.227729
2_0_M1_1	1A	LS174T	2	E1	M1	High	1	2.12466	4.48824	0.347293	0.41164	5.55816	0.691149	0.390356	0.288782	0.22385	0.575607	12.5733	0.638499	0.958941	0.0516506	0.57633	1.23755	0.123171	0.365557	0.240152	16.9305	0.335721	0.592643	0.159106	3.15393	0.281102	0.0870509	0.286547	0.404251	0.417947	0.0909653	3.6026	0.0310708	1.64352	0.362035	0.309507	0.108897	0.574022	0.424029	0.598259	0.165814	0.14532	0.299789
2_0_M3_1	1B	LS174T	2	E2	M3	High	1	2.71068	6.22887	0.41961	0.222934	7.73778	0.75405	0.267581	0.165137	0.0947331	0.338849	18.6701	0.950255	1.44607	0.0709636	0.26164	1.14773	0.01845	0.0658812	0.260506	22.3637	0.537132	0.71914	0.212936	3.08087	0.257825	0.0675021	0.31947	0.292992	0.18027	0.111055	0.253172	0.0194151	1.60278	0.0778881	0.164119	0.142935	0.414218	0.297715	0.532334	0.0522058	0.0696612	0.206067
2_0_N7_1	7A	OXCO1	2	F4	N7	Low	1	1.29776	3.44321	0.667273	0.106904	5.42941	0.52712	0.388637	0.445276	0.508136	0.32121	11.3195	0.076963	0.491733	0.0942173	0.202883	3.44259	0.171498	0.350086	0.121121	7.38738	0.0139944	1.69656	0.397496	0.805277	0.188388	0.0274369	0.353674	0.2149	0.310372	0.316589	1.48101	0.0628285	0.572613	4.8318	0.0737758	1.28388	0.109917	0.230858	2.20161	0.0223401	0.139378	0.812348
2_0_N9_1	7B	OXCO1	2	F5	N9	Low	1	1.15381	5.57725	0.467984	0.0977874	7.69986	0.538915	0.430427	0.307173	0.368383	0.292574	18.3975	0.186471	0.504069	0.124239	0.151474	3.33878	0.0391947	0.311688	0.116816	14.8613	0.0465199	1.02843	0.264319	0.925504	0.256966	0.0664592	0.334222	0.167855	0.196919	0.276063	1.47828	0.0520256	1.22824	3.56659	0.0890719	1.16305	0.114263	0.200158	2.25681	0.0182634	0.140678	0.856133
2_0_O17_1	14A	PCJW	2	G9	O17	High	1	2.94404	6.82367	0.122181	0.589931	8.90842	0.478161	0.215968	0.469444	0.872388	0.389611	13.1085	0.180692	0.655445	0.142272	0.315102	1.70216	0.708548	1.56874	0.1615	10.4858	0.321788	0.719726	0.512442	0.580199	0.29345	1.26923	0.126789	1.50378	2.11711	0.161234	0.602842	0.0250807	0.914247	0.192352	0.948941	0.225009	0.632465	3.04388	0.0694761	0.390701	0.305889	0.145297
2_0_O19_1	14B	PCJW	2	G10	O19	High	1	2.31098	4.93535	0.222032	0.449262	7.2819	0.361827	0.0698177	0.498311	0.739377	0.714496	12.5099	0.183324	0.407106	0.0575669	0.443811	0.986574	0.511401	2.10749	0.217316	13.4074	0.184358	0.511068	0.242653	0.343702	0.260416	0.544666	0.151259	1.99942	2.50209	0.0347707	1.94848	0.153677	0.811567	0.16152	0.384108	0.238884	0.784371	3.5555	0.259934	0.438691	0.583261	0.198722
2_0_P1_1	16A	SW403	2	H1	P1	High	1	1.51894	4.9378	0.209331	0.31986	6.99921	0.496166	0.160676	0.410949	0.946615	0.870585	10.5988	0.257029	0.658165	0.230354	0.546258	1.79502	1.15916	0.935495	0.120258	12.5653	0.1016	0.898725	1.38364	0.678178	0.909753	1.24905	0.116873	0.740987	0.562767	0.132848	3.8356	0.0882393	0.679207	0.158213	0.810295	0.542819	0.946512	0.974659	0.246915	0.528119	0.226056	0.126235
2_0_P3_1	16B	SW403	2	H2	P3	High	1	1.57865	5.68763	0.247563	0.387117	7.72003	0.503755	0.202733	0.400348	1.04819	1.06289	13.3372	0.130692	0.674004	0.213816	0.736244	1.77225	1.00053	1.16875	0.169791	14.3472	0.0772567	1.51752	1.35471	0.730304	0.998892	0.957562	0.29445	0.765665	0.648958	0.0923673	7.01202	0.20197	0.649049	0.0745824	0.591113	0.538244	0.849654	0.871882	0.235859	0.472758	0.248209	0.0835154
2_0_O3_1	11A	VACO429	2	G2	O3	Low	1	1.12701	5.90033	0.269402	0.392349	9.02374	0.64455	0.27522	0.227535	0.791599	0.670793	16.4683	0.0708802	0.529222	0.289138	0.369351	0.135745	0.196724	0.718995	0.0623363	12.3915	0.0656187	1.55031	0.676974	0.195608	0.451139	0.111932	3.61276	0.0776277	0.292291	0.776158	7.10741	0.317056	1.08357	0.240826	0.289937	0.502208	0.149891	0.192269	0.229333	0.225011	0.0938977	0.200275
2_0_O5_1	11B	VACO429	2	G3	O5	Low	1	1.11022	5.8408	0.170636	0.30986	9.70143	0.344701	0.151275	0.126205	0.829018	0.507805	19.8496	0.0716107	0.219294	0.438687	0.12254	0.211467	0.0390077	0.377566	0.0866098	13.9734	0.0402557	1.69317	0.758294	0.218316	0.307619	0.0321804	4.50592	0.16789	0.128409	0.891169	3.04728	0.0514739	1.09548	0.0641427	0.182809	0.520211	0.118257	0.233152	0.161091	0.275734	0.0758959	0.20247
3_0_J12_1	8A	CAR1	3	B6	J12	Low	1	0.98434	6.19366	0.125511	0.392918	9.52358	0.439983	0.262514	0.247748	0.156937	0.815259	21.0993	0.273739	0.481095	0.0918341	0.124479	0.881707	0.0519992	0.296421	0.476632	12.9169	0.119752	0.890392	0.361389	0.659205	0.408826	0.127948	0.207465	0.282507	0.163572	0.373553	2.51801	0.0689292	1.95567	0.678401	0.151172	0.48185	0.124305	0.354381	0.584221	0.0584123	0.14296	0.787522
3_0_J14_1	8B	CAR1	3	B7	J14	Low	1	2.0283	10.5329	0.307698	0.422645	14.059	0.592564	0.294948	0.244988	0.147667	0.554424	24.9483	0.193381	0.559478	0.0428399	0.100605	0.83404	0.102725	0.324868	0.16216	9.63471	0.243791	0.762993	0.315489	0.658014	0.165291	0.0610124	0.36279	0.343645	0.301701	0.192368	0.80174	0.0684528	0.992242	0.385645	0.0636829	0.463068	0.178916	0.273845	0.561377	0.140624	0.0372145	0.495666
3_0_J22_1	10A	CC20	3	B11	J22	Low	1	0.929349	4.6759	0.176465	0.152124	8.87518	0.386743	0.194514	0.103683	0.374644	0.335006	17.7018	0.131509	0.24496	0.142631	0.149099	1.18796	0.0726907	0.169596	0.136116	15.2788	0.0395878	1.06082	0.27767	0.18872	0.22066	0.0252706	0.535918	0.0883293	0.150383	0.469517	1.6484	0.0471242	0.901568	1.39457	0.122474	2.326	0.0523691	0.254634	1.02531	0.0158579	0.165992	0.349293
3_0_J24_1	10B	CC20	3	B12	J24	Low	1	0.795847	4.77998	0.135497	0.226882	8.18451	0.328284	0.129193	0.0902976	0.374699	0.39517	20.254	0.109773	0.288324	0.111743	0.0839705	1.50682	0.0255843	0.222403	0.100329	17.8486	0.0327233	0.669353	0.126934	0.177526	0.2126	0.0379095	0.358188	0.0540767	0.119605	0.589915	2.08319	0.0773957	1.33216	1.43456	0.0603325	1.8212	0.0485069	0.144661	1.12084	0.0417256	0.193894	0.310668
3_0_K14_1	13A	COLO678	3	C7	K14	Low	1	4.89039	7.83509	0.135982	0.113972	13.7331	0.195732	0.21916	0.282755	0.309259	0.0794121	9.28432	0.50705	0.370035	0.0273815	0.373629	1.64469	0.0375782	0.150658	0.158583	8.91806	0.239242	1.0401	0.43334	2.9073	0.0935351	0.100925	0.410611	0.378379	0.286588	0.2398	0.616986	0.0272189	0.75318	1.68358	0.159146	0.477725	0.503492	1.08785	0.845851	0.129486	0.209891	2.3995
3_0_K16_1	13B	COLO678	3	C8	K16	Low	1	3.2648	6.76877	0.524136	0.227196	9.89159	0.255018	0.20249	0.268628	0.210341	0.233826	12.0713	0.333488	0.443184	0.115005	0.188829	1.89347	0.0216051	0.233272	0.121312	13.1894	0.160228	0.75246	0.380517	1.97525	0.108897	0.1416	0.170345	0.304607	0.632908	0.227635	0.611545	0.0947849	0.544897	1.50888	0.286124	0.170721	0.323039	1.33441	1.33356	0.0480052	0.199923	1.44731
3_0_L6_1	17A	GP2D	3	D3	L6	High	1	2.05655	4.70796	0.151377	0.265146	5.22907	0.45918	0.347193	0.204023	0.0638425	0.297221	12.769	0.922907	1.21049	0.035614	0.370201	0.537121	0.0553287	0.185898	0.415782	12.8946	1.73485	0.573824	0.309434	1.21267	0.0956114	0.122652	0.125328	0.323063	0.254117	0.0292255	1.08831	0.0339929	0.970624	0.168401	0.186559	0.126252	0.990727	0.56219	0.436104	0.247904	0.132865	0.168331
3_0_L8_1	17B	GP2D	3	D4	L8	High	1	2.67442	5.51993	0.241589	0.342128	5.81968	0.492566	0.359309	0.22725	0.10217	0.586959	12.125	1.08701	1.47939	0.111288	0.458964	0.439021	0.0658049	0.22944	0.415528	13.0077	2.23832	0.651916	0.16895	1.10712	0.213925	0.158768	0.0481655	0.293074	0.256223	0.0895655	3.02643	0.0387429	0.81414	0.196447	0.342565	0.215888	0.895094	0.397104	0.424065	0.257613	0.049994	0.0922379
3_0_L12_1	18A	HCA46	3	D6	L12	High	1	2.65451	3.60733	0.68756	1.34884	5.1368	0.523614	0.223825	0.882746	0.284711	2.2586	11.1448	0.273872	0.584681	0.085501	0.610286	1.57562	0.0672911	1.55976	1.99528	12.465	0.137125	0.264493	0.28887	1.18581	0.367627	0.193174	0.173848	1.08098	1.84208	0.148254	1.34619	1.22553	0.656514	0.103071	0.140978	0.843617	0.640547	1.41826	1.29838	0.243374	1.33428	0.123068
3_0_L14_1	18B/empty	HCA46	3	D7	L14	High	1	2.84194	4.2769	0.508388	0.784558	5.78983	0.511831	0.304108	0.641728	0.261405	1.28124	12.2051	0.31785	0.700506	0.112384	0.387888	1.50166	0.135046	1.24102	1.00213	14.8347	0.198928	0.224876	0.262798	1.25233	0.274498	0.234851	0.209965	0.880667	1.62472	0.139677	1.18136	0.66509	0.664477	0.0601222	0.146937	0.773853	0.717413	1.487	1.08966	0.308812	0.893838	0.15145
3_0_I16_1	4A	HCT116	3	A8	I16	Low	1	2.51788	4.71519	0.131616	0.140633	5.58844	0.227095	0.481609	0.0842199	1.14777	0.202423	14.0007	0.0509084	0.356317	0.458247	0.136258	0.0818627	0.0836551	0.290934	0.0303255	17.6156	0.0740008	1.34809	1.0891	0.135482	0.283687	0.0687146	5.64629	0.147313	0.160658	1.24418	1.81428	0.123476	1.11317	0.180728	0.24603	0.100315	0.121582	0.251822	0.0695704	0.130277	0.101133	0.0772415
3_0_I18_1	4B	HCT116	3	A9	I18	Low	1	2.08615	5.4949	0.140505	0.129074	6.0893	0.21405	0.371033	0.109676	1.15609	0.136967	15.8972	0.178181	0.127252	0.268233	0.0909264	0.0685565	0.0911264	0.244478	0.210842	20.1369	0.0451025	1.19583	0.92495	0.127675	0.254781	0.0315858	5.28412	0.23395	0.13682	1.31731	1.17976	0.196332	0.992644	0.12376	0.269693	0.191033	0.173849	0.0837202	0.121606	0.164556	0.0260423	0.156839
3_0_J18_1	9A	HDC8	3	B9	J18	Low	1	7.11414	9.44497	0.526003	0.582546	21.2043	0.42977	0.151881	0.336251	0.274062	0.830338	1.84743	0.372765	0.500431	0.219953	0.381296	1.63382	0.170293	0.264545	0.764775	0.642579	0.125371	1.04773	0.425436	1.10563	0.274555	0.0316445	0.320506	0.590462	0.536395	0.378966	0.263536	0.125777	0.141297	0.496225	0.168426	2.88105	0.596303	0.198014	1.86916	0.20274	0.242357	0.258799
3_0_I10_1	human plasma	human plasma	3	A5	I10	n.a.	1	0.239065	0.427921	0.080724	0.461575	0.224365	0.0573082	0.0404373	2.04741	0.255858	0.171482	1.2575	0.0835262	0.156688	0.461408	0.100333	1.99531	0.0676998	0.623793	0.0676723	1.58826	0.0164419	0.476293	0.429463	0.0326341	0.327194	0.0240005	6.54159	0.065771	0.349217	0.120249	1.35163	0.124279	0.134018	0.664596	0.422434	2.67193	0.100298	0.0786948	0.0775364	0.623633	0.593929	0.378427
3_0_J16_1	human plasma	human plasma	3	B8	J16	n.a.	1	0.501547	1.01586	0.0175759	0.531108	0.456413	0.0399299	0.0651173	2.10466	0.345876	0.170695	2.16669	0.0916954	0.208432	0.416871	0.0664414	2.07721	0.0477545	0.609417	0.0702857	3.11573	0.016552	0.560275	0.468371	0.0836723	0.3175	0.0253902	8.00339	0.0790049	0.462235	0.143931	1.18911	0.0578333	0.175746	0.541525	0.37996	2.73759	0.121532	0.11525	0.0981395	0.763756	0.548551	0.351284
3_0_K2_1	human plasma	human plasma	3	C1	K2	n.a.	1	0.182096	0.289339	0.0531218	0.512542	0.166258	0.0647987	0.0793253	2.22464	0.267426	0.192406	1.1214	0.0454194	0.19253	0.453966	0.131391	2.14162	0.0299739	0.623327	0.102817	1.29398	0.0296799	0.445367	0.383628	0.0552455	0.356056	0.010344	6.24174	0.080037	0.443524	0.0570683	0.893392	0.0560816	0.191924	0.58332	0.534933	2.53494	0.0488305	0.0601742	0.0250073	0.485511	0.701269	0.376732
3_0_L20_1	human plasma	human plasma	3	D10	L20	n.a.	1	0.414874	0.698906	0.0397056	0.424187	0.348488	0.0291356	0.0988368	1.75371	0.269022	0.147699	2.05675	0.0329749	0.174816	0.348796	0.0227554	1.70674	0.0692189	0.470967	0.0383709	2.88755	0.00596977	0.464533	0.432671	0.0655792	0.28845	0.0123917	7.45446	0.0828334	0.38214	0.0811428	0.755727	0.0238175	0.142341	0.712209	0.387378	2.7524	0.123696	0.0917152	0.0675682	0.5625	0.480667	0.222329
3_0_K8_1	12A	ISRECO1	3	C4	K8	Low	1	1.44299	2.52386	0.182747	0.177705	5.63664	0.290657	0.351666	0.281273	0.155912	0.507153	17.0021	0.285803	0.572942	0.400566	0.222486	0.633681	0.0423667	0.368413	0.123918	18.6564	0.111899	0.679154	1.33081	0.743372	0.364276	0.0517117	0.686596	0.292614	0.154877	0.276075	3.71535	0.0146313	1.25839	0.323216	0.118847	2.49052	0.232583	0.160155	0.575585	0.100712	0.143197	0.308378
3_0_K22_1	15A	LIM1863	3	C11	K22	High	1	2.11259	5.03475	0.261843	0.31889	6.03973	0.243065	0.205655	0.393749	0.47987	0.513972	11.5423	0.182249	0.428501	0.105273	0.31201	1.12746	0.405167	1.45487	0.223195	9.59088	0.299142	0.724426	0.258938	0.421679	0.122351	0.642749	0.121542	1.24583	1.8308	0.0959336	2.16029	0.340687	0.513222	0.144392	0.423989	0.164057	1.0721	2.54752	0.343888	0.200045	0.832889	0.226592
3_0_K24_1	15B	LIM1863	3	C12	K24	High	1	1.79566	5.33239	0.367717	0.350799	6.10555	0.293365	0.0674756	0.376536	0.48235	0.514738	12.2046	0.177599	0.536786	0.02815	0.455298	1.11102	0.513534	1.0232	0.158219	9.28896	0.247308	0.628645	0.11068	0.412764	0.0678667	0.739115	0.101905	1.01756	1.77628	0.0983828	1.75097	0.0983817	0.504991	0.214749	0.410753	0.128907	0.811794	2.54989	0.298009	0.282537	0.602523	0.218331
3_0_I2_1	1A	LS174T	3	A1	I2	High	1	1.04731	2.90261	0.328676	0.280557	3.38348	0.559826	0.160918	0.36762	0.111869	0.469793	8.91737	0.702117	0.798829	0.103206	0.475807	1.3854	0.0284895	0.476379	0.0642887	13.4096	0.307778	0.770829	0.457674	2.89301	0.170372	0.142433	0.512279	0.36871	0.164804	0.237386	6.86634	0.080293	1.18624	0.223268	0.325917	0.346586	0.57432	0.351657	0.718728	0.131011	0.159652	0.15657
3_0_I4_1	1B	LS174T	3	A2	I4	High	1	1.78158	3.70692	0.407425	0.166479	4.05923	0.569014	0.172942	0.271828	0.145892	0.471303	10.1714	0.762345	1.01932	0.0978064	0.349806	1.24016	0.045421	0.202865	0.0965559	13.4266	0.436925	2.09175	0.538057	3.14428	0.225188	0.113758	0.430512	0.468998	0.3117	0.156391	3.71428	0.110259	1.03421	0.289655	0.385986	0.344222	0.507266	0.622297	0.716501	0.0815541	0.251272	0.380433
3_0_J10_1	7B	OXCO1	3	B5	J10	Low	1	0.73732	2.87711	0.307411	0.176324	3.75229	0.380416	0.297966	0.231751	0.290273	0.508726	9.41343	0.105184	0.378562	0.120493	0.195527	1.88634	0.109249	0.366648	0.0552712	8.14947	0.0588216	1.54797	0.615161	0.675802	0.38196	0.0580763	0.222182	0.15456	0.297669	0.508981	5.87195	0.112692	0.83756	3.01232	0.147534	1.24502	0.12922	0.309038	1.69427	0.130552	0.457436	0.714712
3_0_J8_1	7A	OXCO1	3	B4	J8	Low	1	1.06662	3.1305	0.56449	0.122382	5.33823	0.49326	0.379323	0.398707	0.418071	0.322618	12.1405	0.130458	0.531547	0.0881447	0.170762	3.09121	0.107993	0.389923	0.0642306	8.44863	0.00781702	1.39316	0.417115	0.885109	0.214325	0.0503013	0.367876	0.247154	0.389452	0.366699	2.59001	0.0967568	0.665521	3.99802	0.0946664	1.23661	0.139225	0.267645	2.59307	0.0430653	0.266293	0.705882
3_0_K18_1	14A	PCJW	3	C9	K18	High	1	2.41169	5.64536	0.0776717	0.423817	8.06025	0.285348	0.239319	0.593734	0.590108	0.464215	12.356	0.282259	0.539183	0.129477	0.291219	1.54252	0.621903	1.34438	0.0520507	10.7252	0.263529	0.531055	0.479905	0.424669	0.13425	1.12144	0.141389	1.10248	1.94911	0.145754	0.736554	0.0877896	0.849446	0.218739	0.962583	0.240652	0.625724	3.1729	0.262595	0.345246	0.191258	0.294405
3_0_K20_1	14B	PCJW	3	C10	K20	High	1	2.19878	4.56008	0.111905	0.349189	7.02996	0.415531	0.0848988	0.493332	0.795985	0.69073	11.5157	0.168046	0.365939	0.109271	0.445303	0.864137	0.534292	1.83715	0.170867	11.9222	0.183691	0.600021	0.274643	0.442162	0.156944	0.414157	0.058524	1.97149	2.12296	0.106223	1.42286	0.208475	0.840823	0.117158	0.277786	0.131825	0.838045	3.52645	0.302965	0.350604	0.593888	0.136815
3_0_L16_1	19A	RCM1	3	D8	L16	High	1	2.1315	4.5708	0.152404	0.392289	5.50891	0.376877	0.172288	0.648635	0.642683	0.665472	12.505	0.127447	0.550525	0.0579329	0.582965	1.11365	0.347913	1.27221	0.277095	13.4209	0.251414	0.429984	0.13119	0.568557	0.151257	0.318953	0.28842	1.54213	0.959746	0.129377	1.79822	0.241375	1.08934	0.0680559	0.425862	0.0878296	1.05847	1.77702	0.434939	0.241774	0.38343	0.162941
3_0_L18_1	19B	RCM1	3	D9	L18	High	1	1.49832	3.38479	0.176935	0.396575	4.13504	0.274684	0.117561	0.425105	0.490853	0.488335	9.7645	0.195973	0.55401	0.0685621	0.37535	1.0015	0.375912	1.04128	0.185834	12.3689	0.315828	0.426909	0.194221	0.554727	0.272237	0.377648	0.118364	1.22483	1.05613	0.0410287	2.74209	0.135844	1.47066	0.110367	0.433064	0.0930653	1.04148	1.90256	0.286098	0.183487	0.461444	0.109883
3_0_L4_1	16B	SW403	3	D2	L4	High	1	2.27922	9.06201	0.145437	0.266458	11.7449	0.345014	0.148189	0.353412	1.01147	0.574568	20.4669	0.137421	0.446179	0.15089	0.257334	1.73204	1.47549	0.631736	0.318193	21.1288	0.0742036	0.532657	1.02287	0.387626	0.627088	1.19439	0.28284	0.527951	0.509599	0.0922052	0.743882	0.044853	0.93219	0.044026	0.603757	0.353201	0.629741	0.428763	0.243824	0.329635	0.113478	0.0926368
3_0_K4_1	11A	VACO429	3	C2	K4	Low	1	0.674331	6.27409	0.109429	0.154118	11.5265	0.253337	0.232616	0.13828	0.587006	0.267702	24.7638	0.217701	0.253826	0.378277	0.0483449	0.171429	0.0235474	0.208153	0.0956513	19.9414	0.0336355	0.798418	0.759507	0.230493	0.391256	0.0441323	3.6035	0.152414	0.114319	0.814365	0.933171	0.072701	1.88888	0.12219	0.0846299	0.430007	0.122011	0.105286	0.173082	0.103472	0	0.135752
3_0_K6_1	11B	VACO429	3	C3	K6	Low	1	0.771948	4.5188	0.111141	0.38651	7.71719	0.527705	0.130194	0.109007	0.655803	0.653757	16.6523	0.0950247	0.197616	0.256847	0.310969	0.1906	0.0815773	0.561986	0	12.6537	0.0838233	1.64445	0.936225	0.391829	0.36515	0.0401352	3.42103	0.62031	0.60951	1.05725	5.15137	0.188709	1.06637	0.0817347	0.531478	0.673637	0.141052	0.393389	0.496042	0.198666	0.11837	0.162963
4_0_N12_1	8A	CAR1	4	F6	N12	Low	1	1.03444	6.90235	0.239166	0.397621	10.3494	0.457936	0.329705	0.163847	0.165719	0.511674	24.582	0.185642	0.3789	0.117243	0.123488	0.837931	0.0828647	0.193305	0.247539	16.6457	0.112227	0.597628	0.211061	0.695907	0.300708	0.0512576	0.242952	0.161508	0.230746	0.226011	1.1967	0.0301269	2.50562	0.705326	0.10844	0.391945	0.122544	0.0624551	0.559942	0.10972	0.0509038	0.821171
4_0_N16_1	8B	CAR1	4	F8	N16	Low	1	2.30914	6.93037	0.242639	0.535966	9.71998	0.468061	0.199329	0.193248	0.456633	0.908323	16.3187	0.081991	0.431619	0.121913	0.895093	0.876526	0.165002	0.48394	0.140681	6.65849	0.198283	0.97124	0.605521	0.601381	0.370183	0.324138	0.441474	0.39434	0.596667	0.591911	1.84223	0.313366	0.634294	0.660781	0.500719	0.479497	0.142095	0.553169	0.830046	0.0913378	0.0513941	0.787265
4_0_N22_1	10A	CC20	4	F11	N22	Low	1	0.740985	3.91085	0.106908	0.120569	6.8827	0.11621	0.136519	0.107616	0.368737	0.265307	14.0349	0.0209968	0.139512	0.0632164	0.04122	1.28854	0.024074	0.101676	0.0708489	12.2453	0.0397965	0.968659	0.164126	0.198972	0.196298	0.0338625	0.637566	0.0621599	0.109263	0.567697	1.19903	0.0500219	0.787296	2.09687	0.0590974	2.65044	0.116984	0.0688756	1.03911	0.0626536	0.115566	0.370622
4_0_N24_1	10B	CC20	4	F12	N24	Low	1	0.78995	3.70926	0.0995284	0.372649	6.37384	0.281817	0.127	0.224904	0.363058	0.32022	16.1833	0.0611047	0.23881	0.118668	0.0450481	1.30047	0.0294729	0.196928	0.140978	14.2621	0.0681585	1.02463	0.0968081	0.209309	0.203005	0.0189515	0.506383	0.0928717	0.124086	0.356812	2.14191	0.111327	1.24819	1.95164	0.0993482	2.05322	0.0889022	0.0948561	1.01944	0.0299222	0.0934455	0.350582
4_0_O14_1	13A	COLO678	4	G7	O14	Low	1	4.44357	6.91371	0.498182	0.175318	13.2189	0.340398	0.130149	0.161168	0.229619	0.178892	9.69411	0.319068	0.407392	0.0140618	0.324685	1.653	0.0932848	0.215258	0.0240355	10.3791	0.264343	1.00728	0.407604	3.30173	0.281743	0.140092	0.323844	0.358691	0.141009	0.20402	0.981616	0	0.864177	1.70185	0.405858	0.328518	0.659934	1.24335	0.871642	0.0582174	0.115499	2.36019
4_0_O16_1	13B	COLO678	4	G8	O16	Low	1	2.16475	4.49735	0.446778	0.149215	7.25577	0.35105	0.207638	0.233924	0.0907779	0.165854	9.38096	0.297953	0.371967	0.0530332	0.228732	1.89883	0.048301	0.22321	0.119562	11.4836	0.114671	0.893154	0.198099	2.03542	0.0610015	0.182749	0.127542	0.265772	0.698331	0.177906	1.78383	0.0151414	0.543598	1.90317	0.254683	0.173815	0.353837	1.34847	1.4474	0.0886761	0.125523	1.83344
4_0_P6_1	17A	GP2D	4	H3	P6	High	1	1.53246	3.59498	0.192286	0.234274	4.37058	0.409815	0.343477	0.270955	0.0944434	0.417631	10.5068	0.902044	1.02094	0.0424746	0.346583	0.563727	0.0768806	0.299275	0.158725	10.6032	1.4965	0.446995	0.192944	1.21634	0.14266	0.0830626	0.106203	0.434462	0.270553	0.0647322	3.0046	0.0404681	0.87515	0.191933	0.314538	0.227374	0.928151	0.53507	0.437523	0.310444	0.0744968	0.12784
4_0_P22_1	20A	HCC56	4	H11	P22	High	1	1.46755	4.98173	0.201546	0.193189	8.47309	0.233809	0.190491	0.369636	0.16568	0.551765	15.0163	0.241173	0.401555	0.204004	0.224139	0.425857	0.0880266	0.324625	0.160986	14.9914	0.239664	0.546269	0.93002	0.371068	0.435861	0.290933	0.271177	0.26493	0.384556	0.253609	5.49142	0.102629	1.17983	0.176666	0.226766	0.685604	0.736423	0.753828	0.320757	0.42075	0.154807	0.467899
4_0_P24_1	20B	HCC56	4	H12	P24	High	1	2.20386	6.40187	0.176285	0.335081	11.9448	0.337558	0.144753	0.190684	0.0286447	0.341608	20.8328	0.122908	0.356915	0.324393	0.20624	0.38223	0.11866	0.329243	0.138074	16.9732	0.135751	0.423811	0.71359	0.313102	0.243388	0.148763	0.116499	0.434865	0.215562	0.127766	2.56674	0.0434326	1.30956	0.180634	0.361578	0.684472	0.481199	0.651688	0.244906	0.313562	0.143859	0.361783
4_0_M16_1	4A	HCT116	4	E8	M16	Low	1	2.56539	4.86004	0.0822196	0.0533404	6.58731	0.214229	0.504933	0.0896162	1.13195	0.0308069	16.2898	0.0764518	0.206677	0.511361	0.0358689	0	0.102674	0.0649831	0.00355337	22.5237	0.0379214	1.29157	1.05414	0.050235	0.305425	0.023398	6.58513	0.204509	0.116335	1.37854	1.01048	0.0437791	1.2037	0.0741191	0.182772	0.170058	0.0817538	0.0709471	0.00860235	0.181459	0.0379129	0.055602
4_0_N18_1	9A	HDC8	4	F9	N18	Low	1	5.02579	7.6713	0.356309	0.586077	18.698	0.349226	0.134623	0.435704	0.303145	0.63815	1.55689	0.146132	0.231294	0.0982747	0.281518	1.7825	0.117836	0.305986	0.499695	0.748764	0.192493	0.581223	0.254332	1.29832	0.34467	0.185251	0.474775	0.761358	0.562386	0.54851	0.285745	0.125986	0.163272	0.695584	0.116402	3.70076	0.602988	0.216698	2.08776	0.217683	0.223725	0.475481
4_0_N20_1	9B	HDC8	4	F10	N20	Low	1	4.68623	6.35925	0.5135	0.851505	13.6698	0.386297	0.12379	0.570749	0.433549	1.26428	1.2688	0.112124	0.379038	0.105995	0.448062	2.15705	0.0692683	0.439795	1.05058	0.537415	0.206004	0.820896	0.23914	1.26205	0.444526	0.17619	0.45442	0.690329	0.750204	0.472424	0.407787	0.274824	0.260135	0.792441	0.317559	3.56347	0.690791	0.229028	2.46087	0.349788	0.394905	0.30262
4_0_M6_1	human plasma	human plasma	4	E3	M6	n.a.	1	0.478929	2.10838	0.0792724	0.33141	2.39438	0.115553	0.11223	1.62703	0.328141	0.188298	7.34778	0.103442	0.458947	0.475937	0.0649744	1.94208	0.0412264	0.486911	0.0700321	9.09717	0.0575958	0.653003	0.438703	0.422515	0.353269	0.0156037	7.83866	0.136322	0.550498	0.12367	1.29927	0.0213284	0.599008	0.52984	0.539969	2.34156	0.312599	0.168104	0.189014	0.62482	0.518096	0.335505
4_0_N14_1	human plasma	human plasma	4	F7	N14	n.a.	1	0.450628	0.874842	0.0464	0.503375	0.44174	0.0567851	0.116375	2.04472	0.350714	0.177177	2.664	0.0388071	0.284878	0.426211	0.0439384	1.78954	0.0422016	0.475625	0.0420228	3.43324	0.0132455	0.53516	0.4211	0.0479899	0.355288	0.0379202	8.20091	0.0769228	0.328693	0.0963545	0.819233	0.0393419	0.181723	0.608223	0.521039	2.58737	0.109005	0.106812	0.0495595	0.596586	0.500486	0.324082
4_0_O2_1	human plasma	human plasma	4	G1	O2	n.a.	1	0.38943	0.937768	0.0259862	0.508648	0.589239	0.0691303	0.106513	2.23473	0.44304	0.192055	3.65752	0.0761979	0.403349	0.567409	0.033325	2.35989	0.074586	0.598156	0.0972456	4.93521	0.00586614	0.749601	0.530667	0.0907333	0.373657	0.0252628	8.46976	0.0768417	0.613124	0.187493	1.52055	0.0613362	0.247344	0.698568	0.786959	3.05591	0.161208	0.099592	0.0783308	0.65284	0.642033	0.305591
4_0_P20_1	human plasma	human plasma	4	H10	P20	n.a.	1	0.354669	0.497147	0.0782397	0.348614	0.285991	0.0889425	0.0973437	1.20236	0.2132	0.147965	1.39778	0.0451701	0.137717	0.425871	0.0694982	1.31407	0.0509029	0.370299	0.0195549	1.96501	0.00901024	0.484275	0.446216	0.0472498	0.29428	0.0369495	6.91419	0.0866203	0.304363	0.137249	1.75497	0.069549	0.241581	0.768289	0.588473	2.34627	0.112538	0.123373	0.0193826	0.544466	0.63677	0.428401
4_0_O10_1	12B	ISRECO1	4	G5	O10	Low	1	1.88193	2.67854	0.224177	0.485864	5.12825	0.242351	0.283184	0.324298	0.168256	1.00636	12.866	0.145572	0.417848	0.182503	0.343321	0.618582	0.149179	0.397046	0.39527	11.1521	0.0659797	1.0431	0.653501	0.571622	0.62238	0.0846989	0.537695	0.439982	0.400026	0.249397	7.57217	0.263174	0.979177	0.332019	0.0540367	1.54037	0.200079	0.468213	0.547644	0.144528	0.278077	0.367538
4_0_O8_1	12A	ISRECO1	4	G4	O8	Low	1	1.18608	2.14984	0.219383	0.183126	5.23788	0.370274	0.289093	0.225779	0.154829	0.493211	16.0564	0.184004	0.610164	0.322158	0.192825	0.724952	0.0588572	0.405569	0.107153	18.0304	0.110115	0.935031	1.09942	0.78249	0.516532	0.0642635	0.551263	0.182511	0.277265	0.283344	5.61052	0.0673937	1.12936	0.357287	0.121179	2.27926	0.152565	0.239833	0.590921	0.119975	0.129092	0.319945
4_0_O22_1	15A	LIM1863	4	G11	O22	High	1	1.68997	5.72861	0.118914	0.281061	7.55829	0.264038	0.172025	0.491265	0.619393	0.566289	15.104	0.296897	0.329463	0.071199	0.398019	1.27075	0.539951	1.51582	0.142876	12.4513	0.198166	0.344973	0.189629	0.505389	0.0977969	0.720207	0.203533	1.12759	1.98	0.0905898	1.67005	0.0911639	0.691145	0.109818	0.42274	0.0699119	1.05632	2.57742	0.320948	0.1878	0.619785	0.118632
4_0_M2_1	1A	LS174T	4	E1	M2	High	1	1.54647	4.30492	0.274444	0.145431	6.00517	0.606227	0.269502	0.171914	0.124821	0.325215	17.061	0.837213	1.18722	0.0920916	0.252945	1.30544	0.0384992	0.1978	0.185737	25.5984	0.480982	0.401696	0.131143	3.1612	0.433242	0.107047	0.2928	0.279005	0.144215	0.0974505	0.881975	0.0164205	2.18524	0.146248	0.219988	0.144902	0.453637	0.287499	0.603535	0.104274	0.0383697	0.218626
4_0_M4_1	1B	LS174T	4	E2	M4	High	1	1.81738	4.25585	0.394127	0.20549	5.53076	0.563587	0.201213	0.183109	0.0676733	0.333068	14.3764	0.831249	1.11905	0.0534094	0.287888	1.23373	0.0434101	0.114429	0.163483	18.5336	0.553654	0.423243	0.165166	3.2877	0.233818	0.0826697	0.206326	0.333909	0.14583	0.0809917	0.932694	0.0241816	1.34201	0.164315	0.221715	0.151686	0.450505	0.361211	0.604655	0.0554504	0.0703838	0.296199
4_0_N10_1	7B	OXCO1	4	F5	N10	Low	1	0.971837	5.05871	0.397723	0.16756	7.44591	0.457794	0.306614	0.316912	0.297871	0.328178	19.405	0.101636	0.441118	0.14052	0.120735	3.15342	0.041178	0.25241	0.112494	15.7855	0.0740607	0.821866	0.297941	0.849323	0.224695	0.0455547	0.357866	0.166274	0.25444	0.304585	1.70121	0.0521339	1.31945	3.28677	0.0248345	1.17224	0.15484	0.191585	2.39961	0.0332866	0.134381	0.818407
4_0_N8_1	7A	OXCO1	4	F4	N8	Low	1	0.717265	2.51937	0.46264	0.264696	4.02231	0.567656	0.546357	0.882454	0.32757	0.363571	8.2144	0.215378	0.384704	0.143629	0.204286	2.34927	0.102663	0.284839	0.0618318	5.42396	0.177267	1.16696	0.633957	0.745507	0.221489	0.0124002	0.328977	0.286308	0.391293	0.602452	3.22457	0.177317	0.467666	3.19618	0.248836	1.30617	0.227267	0.269044	1.83655	0.0970673	0.28363	0.568976
4_0_O20_1	14B	PCJW	4	G10	O20	High	1	2.19178	4.30231	0.102758	0.41375	5.72151	0.326137	0.10319	0.614952	0.800348	0.911778	10.0686	0.228908	0.531226	0.0762125	0.550307	0.895592	0.54846	2.21967	0.304431	10.8127	0.213616	0.59609	0.294368	0.516911	0.136334	0.472204	0.204122	2.13685	2.66249	0.149031	1.59537	0.234121	0.813033	0.181384	0.332151	0.218909	0.88556	3.73081	0.285662	0.451856	0.457192	0.12381
4_0_P16_1	19A/18A	RCM1	4	H8	P16	High	1	1.24987	3.28132	0.139219	0.193016	4.6472	0.227851	0.0872954	0.421996	0.491013	0.43345	12.7059	0.297186	0.529643	0.0804565	0.371511	0.925208	0.321304	1.07077	0.252429	15.5597	0.226753	0.337267	0.158016	0.531579	0.22338	0.420105	0.156479	1.34429	0.893272	0.0378905	2.38442	0.181601	1.25369	0.114796	0.371501	0.091181	1.02663	1.71355	0.278506	0.281045	0.394132	0.117725
4_0_P18_1	19B/18B	RCM1	4	H9	P18	High	1	1.20657	2.77722	0.185242	0.217348	3.48256	0.294632	0.0588045	0.387244	0.53186	0.527047	8.96788	0.224855	0.522184	0.0764364	0.402034	1.00019	0.398744	1.14768	0.165716	11.8117	0.284295	0.430163	0.169246	0.62437	0.384329	0.42181	0.167424	1.29437	1.04194	0.0528214	2.77491	0.103707	1.40688	0.128984	0.493602	0.113893	1.12986	1.78044	0.287739	0.232327	0.517155	0.139627
4_0_P2_1	16A	SW403	4	H1	P2	High	1	1.36602	4.46973	0.181311	0.291255	7.13545	0.343642	0.125712	0.381034	0.872579	0.692309	12.0347	0.183264	0.469149	0.149219	0.588436	1.61863	1.00546	0.864371	0.0982565	14.6097	0.16232	0.39092	1.2637	0.731706	0.791377	1.18288	0.215136	0.561747	0.610971	0.134148	6.17674	0.0524425	0.794829	0.108552	0.698254	0.525741	0.899688	0.640911	0.241225	0.454827	0.146809	0.15729
4_0_P4_1	16B	SW403	4	H2	P4	High	1	1.41676	4.92527	0.214972	0.619935	7.52105	0.312964	0.0878264	0.467137	0.915747	0.984628	12.936	0.0834424	0.663629	0.283738	0.599211	1.477	0.954053	1.0434	0.111847	13.2061	0.177566	0.375259	1.10529	0.788103	0.76345	0.838171	0.238303	0.579997	0.660235	0.0766234	6.65641	0.230382	0.751073	0.113588	0.542127	0.703853	0.927089	0.728678	0.238675	0.578377	0.279839	0.183861
4_0_O4_1	11A	VACO429	4	G2	O4	Low	1	0.587129	5.99761	0.0670858	0.0939558	12.6129	0.371534	0.217588	0.0882554	0.616995	0.209262	27.5819	0.185055	0.457325	0.439655	0.0303217	0.181641	0.0180055	0.149035	0.0846761	21.9493	0.0703058	0.951575	0.663145	0.163928	0.428118	0.0445877	3.05244	0.110724	0.166725	0.848756	0.505462	0.0377835	1.99721	0.0689365	0.0911934	0.365988	0.091049	0.160397	0.152901	0.113199	0.0823411	0.154786
4_0_O6_1	11B	VACO429	4	G3	O6	Low	1	0.626015	4.86699	0.137206	0.340395	8.49278	0.190834	0.0935354	0.117952	0.564694	0.68949	19.7256	0.0942512	0.32679	0.397296	0.290424	0.183128	0.0481446	0.531417	0.0666479	14.6375	0.0557369	2.15223	0.783212	0.276866	0.272903	0.0609624	3.53189	0.338681	0.206056	0.605252	7.00514	0.0689483	1.12515	0.0761043	0.208617	0.445894	0.106898	0.267326	0.235193	0.250962	0.0920072	0.149416
[truncated: 92 more columns]
